# Supplementary material
Source: PubMed Central journal article supplement (PMC6528277)
Supplement: ol9b00778_si_001.pdf [file ol9b00778_si_001.pdf]

## Supporting Information

### **Diverse Isoquinoline Scaffolds by Ugi/Pomeranz–Fritsch and Ugi/Schlittler–Müller Reactions**

Yuanze Wang<sup>[a]</sup>, Pravin Patil<sup>[a]</sup>, Katarzyna Kurpiewska<sup>[b]</sup>, Justyna Kalinowska-Tluscik<sup>[b]</sup>,  
Alexander Dömling<sup>[b]\*</sup>

[a] University of Groningen, Department of Drug Design, A. Deusinglaan 1, 9713 AV Groningen, The Netherlands.

[b] Jagiellonian University, Faculty of Chemistry, Department of Crystal Chemistry and Crystal Physics, Biocrystallography Group, Ingardena 3, 30-060 Krakow, Poland.

Fax: (+31)503637582.

E-mail: a.s.s.domling@rug.nl, [www.drugdesign.nl](http://www.drugdesign.nl)

## Contents

|                                                                 |         |
|-----------------------------------------------------------------|---------|
| General methods . . . . .                                       | S3      |
| Experimental procedures . . . . .                               | S4-S5   |
| $^1\text{H}$ , $^{13}\text{C}$ NMR and mass data . . . . .      | S6-S15  |
| $^1\text{H}$ , $^{13}\text{C}$ NMR and mass spectra's . . . . . | S16-S73 |
| Crystal x-ray structure determination . . . . .                 | S74     |
| Figure SI-1: log P vs Mol. weight plot. . . . .                 | S75     |
| References. . . . .                                             | S78     |

## Experiment procedures and Characterization Data of Products

### General methods

All chemicals were purchased from commercial suppliers and used without any purification unless otherwise noted. Nuclear magnetic resonance spectra were recorded. Chemical shifts for  $^1\text{H}$  NMR were reported as  $\delta$  values and coupling constants were in hertz (Hz). The following abbreviations were used for spin multiplicity: s = singlet, bs = broad singlet, d = doublet, t = triplet, q = quartet, quin = quintet, dd = double of doublets, ddd = double of doublet of doublets, m = multiplet. Chemical shifts for  $^{13}\text{C}$  NMR reported in ppm relative to the solvent peak. Thin layer chromatography was performed on silica gel plates (0.20 mm thick, particle size 25  $\mu\text{m}$ ). Flash chromatography was performed using RediSep R<sub>f</sub> Normal-phase Silica Flash Columns (Silica Gel 60 Å, 230-400 mesh). High resolution mass spectra were recorded using a LTQ-Orbitrap-XL (Thermo) at a resolution of 60000@m/z400.

### **General procedure A: synthesis of isoquinoline 6**

To the stirred solution of oxo-component (1 mmol, 1.0 equiv.) in methanol (1M) at room temperature, was added 2,2-dimethoxyethylamine (1 mmol, 1.0 equiv.), acid (1 mmol, 1.0 equiv.) and isocyanide (1 mmol, 1.0 equiv.). The resulting mixture was stirred at room temperature for 15 h. Solvents were removed under vacuum. Then the crude Ugi-adduct (**5**) was dissolved in 3 mL acetonitrile and methanesulfonic acid (20 mmol, 20.0 equiv.) was added. The resulting mixture was stirred at room temperature for 18 h. The reaction was diluted with dichloromethane and quenched with saturated sodium bicarbonate solution at 0-5 °C. The resulting solution was extracted with dichloromethane (10 mL x 3). The solvents were removed under vacuum and the crude product was purified by flash column chromatography to give pure product (**6**).

### **General procedure B: synthesis of benzo[*d*]azepinone 8**

To the stirred solution of oxo-component (1 mmol, 1.0 equiv.) in methanol (1M) at room temperature, was added 2,2-dimethoxyethylamine (1 mmol, 1.0 equiv.), pivalic acid (1 mmol, 1.0 equiv.) and isocyanide (1 mmol, 1.0 equiv.). The resulting mixture was stirred at room temperature for 15 h. Solvents were removed under vacuum. Then the crude Ugi-adduct (**7**) was dissolved in 37% HCl(aq) solution in dioxane (1 mL, 1:1, v/v) and was stirred at room temperature for 18 h. The reaction was diluted with dichloromethane and quenched with saturated sodium bicarbonate solution at 0-5 °C. The resulting solution was extracted with dichloromethane (10 mL x 3). The solvents were removed under vacuum and the crude product was purified by flash column chromatography to give pure product (**8**).

### **General procedure C: synthesis of isoquinoline and carboline derivatives 10**

To a stirred solution of 2,2-dimethoxyacetaldehyde (1 mmol) in MeOH (1M) at room temperature, amine (1 mmol), benzoic acid (1 mmol) and isocyanide (1 mmol) were added. The resulting mixture was stirred at room temperature for 15 h. Upon completion, the solvent was evaporated under vacuum. Then, the crude Ugi-adduct (**1**) was dissolved in 37% HCl<sub>(aq)</sub> solution in dioxane (1 mL, 4:1, v/v) and was stirred at room temperature for 48 h. The reaction was diluted with dichloromethane (20 mL) and washed with saturated sodium bicarbonate solution (3 x 10 mL). Finally, the solvent was evaporated under vacuum and the crude product was purified by flash column chromatography using petroleum ether/ethyl acetate.

### **General procedure D: synthesis of tetrazole 12**

To the stirred solution of oxo-component (2 mmol, 1.0 equiv.) in methanol (1M) at room temperature, was added 2,2-dimethoxyethylamine (2 mmol, 1.0 equiv.), isocyanide (2 mmol, 1.0 equiv.) and trimethylsilyl azide (2 mmol, 1.0 equiv.). The resulting mixture was stirred at room temperature for 15 h. Solvents were removed under vacuum. Then the crude Ugi-adduct (**9**) was dissolved in 3 mL pyridine and *p*-tolunene sulfonyl chloride (2.4 mmol, 1.2 equiv.) was added. The resulting mixture was stirred at room temperature for 12 h. Solvents were removed

under vacuum. The residue was dissolved in dichloromethane (8 mL) and washed by 1M HCl solution (5 mL x 3). The solvents were removed under vacuum and the crude product was purified by flash column chromatography to give pure product (**12**).

**General procedure E: synthesis of isoquinoline-tetrazole 13**

To the stirred solution of tetrazole **12** (0.5 mmol, 1.0 equiv.) in dioxane (4 mL) at room temperature, was added 6 M HCl solution (1 mL). The mixture was kept under reflux for 7 h. Solvents were removed under vacuum, the crude product was dissolved in dichloromethane (8 mL), washed by saturated sodium bicarbonate solution (5 mL x 3), saturated sodium chloride solution (5 mL x 1) and dried over MgSO<sub>4</sub>. The solvents were removed under vacuum and the crude product was purified by flash column chromatography to give pure product (**13**).

**General procedure F: synthesis of tetrazole 14**

To the stirred solution of 3,5-dimethoxybenzaldehyde (3 mmol, 1.0 equiv.) in methanol (1M) at room temperature, was added 2,2-dimethoxyethylamine (3 mmol, 1.0 equiv.), Methyl isocyanacetate (3 mmol, 1.0 equiv.) and trimethylsilyl azide (3 mmol, 1.0 equiv.). The resulting mixture was stirred at room temperature for 15 h. Then the sodium methoxide (3 mmol, 1.0 equiv.) was added. The resulting mixture was stirred at room temperature for 1 h. Solvents were removed under vacuum, the crude product was dissolved in dichloromethane (20 mL), washed by water (10 mL x 2), saturated sodium chloride solution (10 mL x 1) and dried over MgSO<sub>4</sub>. The solvents were removed under vacuum and the crude product was purified by flash column chromatography to give pure product (**14**).

**General procedure G: synthesis of tetracyclic product 15**

To the stirred solution of tetrazole **14** (1 mmol, 1.0 equiv.) in dioxane (2 mL) at room temperature, was added 37% HCl solution (1 mL). The resulting mixture was stirred at room temperature for 1 h. Solvents were removed under vacuum, the crude product was dissolved in dichloromethane (8 mL), washed by saturated sodium bicarbonate solution (5 mL x 3), saturated sodium chloride solution (5 mL x 1) and dried over MgSO<sub>4</sub>. The solvents were removed under vacuum and the crude product was purified by flash column chromatography to give pure product (**15**).

**6a: 2-(2-(4-chlorophenyl)acetyl)-5,6,7-trimethoxy-N-phenethyl-1,2-dihydroisoquinoline-1-carboxamide**

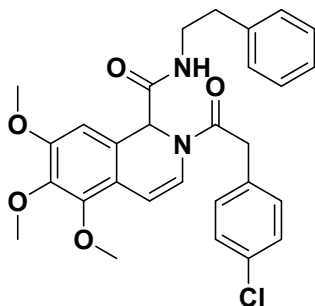

The product was synthesized according to procedure A in 1 mmol scale and purified by column chromatography using petroleum ether: ethyl acetate, afforded as white solid (270 mg, 52% yield), M.P.= 160 –161 °C;  $^1\text{H}$  NMR (500 MHz,  $\text{CDCl}_3$ )  $\delta$  7.31 – 7.19 (m, 5H), 7.19 – 7.15 (m, 2H), 7.06 – 7.01 (m, 2H), 6.59 – 6.55 (m, 1H), 6.51 (s, 1H), 6.19 (d,  $J$  = 7.8 Hz, 1H), 6.02 (s, 1H), 5.78 (s, 1H), 3.89 (s, 3H), 3.87 (s, 3H), 3.81 (s, 3H), 3.79 (s, 2H), 3.42 (q,  $J$  = 6.5 Hz, 2H), 2.78 – 2.62 (m, 2H);  $^{13}\text{C}$  NMR (126 MHz,  $\text{CDCl}_3$ )  $\delta$  169.4, 168.6, 153.3, 148.8, 142.1, 138.6, 133.2, 132.2, 130.5, 129.0, 128.8, 128.6, 126.5, 124.1, 122.1, 117.1, 107.0, 106.4, 61.5, 61.0, 57.0, 56.2, 40.8, 39.6, 35.3; HRMS (ESI)  $m/z$  calculated for  $\text{C}_{29}\text{H}_{30}\text{ClN}_2\text{O}_5$   $[\text{M}+\text{H}]^+$ : 521.1838; found  $[\text{M}+\text{H}]^+$ : 521.1835.

**6b: 2-(3-bromopropanoyl)-5,6,7-trimethoxy-N-phenethyl-1,2-dihydroisoquinoline-1-carboxamide**

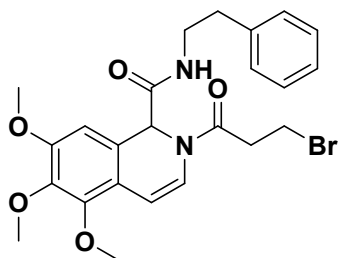

The product was synthesized according to procedure A in 1 mmol scale and purified by column chromatography using petroleum ether: ethyl acetate, afforded as white solid (226 mg, 45% yield), M.P.= 153 –155 °C;  $^1\text{H}$  NMR (500 MHz,  $\text{CDCl}_3$ )  $\delta$  7.31 – 7.17 (m, 3H), 7.09 – 7.03 (m, 2H), 6.57 – 6.50 (m, 2H), 6.23 (d,  $J$  = 7.8 Hz, 1H), 6.01 (s, 1H), 5.88 (t,  $J$  = 6.0 Hz, 1H), 3.90 (s, 3H), 3.87 (s, 3H), 3.82 (s, 3H), 3.71 – 3.58 (m, 2H), 3.50 – 3.40 (m, 2H), 3.11 – 3.03 (m, 1H), 3.02 – 2.94 (m, 1H), 2.78 – 2.68 (m, 2H);  $^{13}\text{C}$  NMR (126 MHz,  $\text{CDCl}_3$ )  $\delta$  168.9, 168.5, 153.4, 148.8, 142.1, 138.6, 128.8, 128.6, 126.5, 124.1, 121.5, 117.0, 107.1, 106.7, 61.5, 61.0, 56.9, 56.2, 40.7, 36.3, 35.2, 26.3; HRMS (ESI)  $m/z$  calculated for  $\text{C}_{24}\text{H}_{28}\text{BrN}_2\text{O}_5$   $[\text{M}+\text{H}]^+$ : 503.1176; found  $[\text{M}+\text{H}]^+$ : 503.1178.

**6c: 2-benzoyl-N-cyclohexyl-5,7-dimethoxy-1,2-dihydroisoquinoline-1-carboxamide**

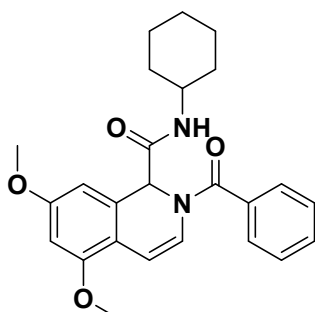

The product was synthesized according to procedure A in 1 mmol scale and purified by column chromatography using petroleum ether: ethyl acetate, afforded as white solid (139 mg, 33% yield), M.P.= 241 – 243 °C;  $^1\text{H}$  NMR (500 MHz,  $\text{CDCl}_3$ )  $\delta$  7.61 – 7.56 (m, 2H), 7.52 – 7.48 (m, 1H), 7.46 – 7.41 (m, 2H), 6.54 – 6.36 (m, 3H), 6.26 (s, 1H), 6.18 (d,  $J$  = 7.7 Hz, 1H), 6.08 (s, 1H), 3.83 (s, 3H), 3.82 (s, 3H), 3.76 – 3.66 (m, 1H), 1.86 – 1.78 (m, 2H), 1.68 – 1.58 (m, 2H), 1.57 – 1.50 (m, 1H), 1.37 – 1.27 (m, 2H), 1.22 – 1.09 (m, 3H);  $^{13}\text{C}$  NMR (126 MHz,  $\text{CDCl}_3$ )  $\delta$  170.0, 167.9, 160.5, 155.6, 134.0, 131.3, 130.8, 129.1, 128.6, 123.8, 113.3, 105.2, 104.1, 98.6, 58.5, 55.7, 48.4, 32.9, 32.8, 25.6, 24.6; HRMS (ESI)  $m/z$  calculated for  $\text{C}_{25}\text{H}_{29}\text{N}_2\text{O}_4$   $[\text{M}+\text{H}]^+$ : 421.2123; found  $[\text{M}+\text{H}]^+$ : 421.2122.

**6d: 2-(3-bromobenzoyl)-*N*-cyclohexyl-6,7-dimethoxy-1,2-dihydroisoquinoline-1-carboxamide**

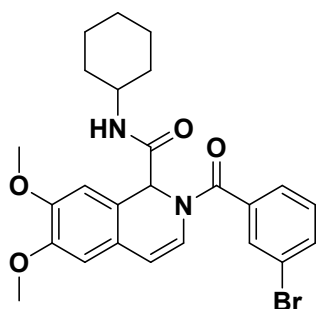

The product was synthesized according to procedure A in 1 mmol scale and purified by column chromatography using petroleum ether: ethyl acetate, afforded as light yellow solid (269 mg, 54% yield), M.P.= 209 – 211 °C; <sup>1</sup>H NMR (500 MHz, CDCl<sub>3</sub>) δ 7.72 (t, *J* = 1.8 Hz, 1H), 7.67 – 7.61 (m, 1H), 7.50 (d, *J* = 7.6 Hz, 1H), 7.32 (t, *J* = 7.9 Hz, 1H), 6.86 (s, 1H), 6.67 (s, 1H), 6.45 (d, *J* = 7.6 Hz, 1H), 6.19 (s, 1H), 6.07 (s, 1H), 5.83 (d, *J* = 7.6 Hz, 1H), 3.89 (s, 3H), 3.86 (s, 3H), 3.75 – 3.62 (m, 1H), 1.86 – 1.75 (m, 2H), 1.66 – 1.51 (m, 3H), 1.37 – 1.22 (m, 2H), 1.22 – 1.04 (m, 3H); <sup>13</sup>C NMR (126 MHz, CDCl<sub>3</sub>) δ 168.3, 168.0, 149.3, 148.9, 135.8, 134.3, 131.8, 130.3, 127.4, 124.7, 123.4, 122.8, 120.8, 110.7, 110.6, 108.7, 58.1, 56.3, 56.1, 48.5, 32.8, 25.6, 24.6; HRMS (ESI) *m/z* calculated for C<sub>25</sub>H<sub>28</sub>BrN<sub>2</sub>O<sub>4</sub> [M+H]<sup>+</sup>: 499.1227; found [M+H]<sup>+</sup>: 499.1225.

**6e: *N*-benzyl-2-(3-bromopropanoyl)-5,6,7-trimethoxy-1,2-dihydroisoquinoline-1-carboxamide**

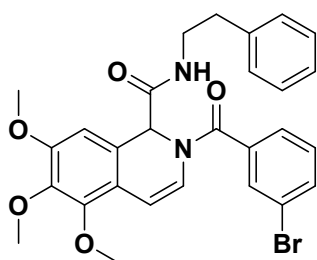

The product was synthesized according to procedure A in 1 mmol scale and purified by column chromatography using petroleum ether: ethyl acetate, afforded as white solid (336 mg, 61% yield), M.P.= 167 – 169 °C; <sup>1</sup>H NMR (500 MHz, CDCl<sub>3</sub>) δ 7.68 – 7.61 (m, 2H), 7.43 (d, *J* = 7.7 Hz, 1H), 7.33 – 7.20 (m, 4H), 7.07 (d, *J* = 7.2 Hz, 2H), 6.58 (s, 1H), 6.35 (d, *J* = 7.8 Hz, 1H), 6.19 – 6.09 (m, 2H), 6.01 (s, 1H), 3.93 (s, 3H), 3.88 (s, 3H), 3.83 (s, 3H), 3.50 (q, *J* = 6.4 Hz, 2H), 2.77 (q, *J* = 6.7 Hz, 2H); <sup>13</sup>C NMR (126 MHz, CDCl<sub>3</sub>) δ 168.6, 168.1, 153.5, 149.0, 142.3, 138.8, 135.5, 134.4, 132.1, 130.1, 128.9, 128.8, 127.6, 126.7, 124.2, 124.0, 122.8, 117.5, 107.0, 105.8, 61.6, 61.1, 58.0, 56.3, 40.9, 35.4; HRMS (ESI) *m/z* calculated for C<sub>28</sub>H<sub>28</sub>BrN<sub>2</sub>O<sub>5</sub> [M+H]<sup>+</sup>: 551.1176; found [M+H]<sup>+</sup>: 551.1177.

**6f: 5,7-dimethoxy-*N*-phenethyl-2-(thiophene-2-carbonyl)-1,2-dihydroisoquinoline-1-carboxamide**

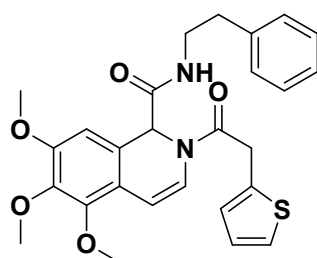

The product was synthesized according to procedure A in 1 mmol scale and purified by column chromatography using petroleum ether: ethyl acetate, afforded as yellow solid (206 mg, 46% yield), M.P.= 187 – 189 °C; <sup>1</sup>H NMR (500 MHz, CDCl<sub>3</sub>) δ 7.61 – 7.58 (m, 1H), 7.56 – 7.54 (m, 1H), 7.23 – 7.18 (m, 2H), 7.18 – 7.14 (m, 1H), 7.11 – 7.05 (m, 3H), 6.73 (d, *J* = 7.2 Hz, 1H), 6.42 (d, *J* = 2.2 Hz, 1H), 6.38 (d, *J* = 2.2 Hz, 1H), 6.37 – 6.33 (m, 1H), 6.31 (d, *J* = 7.6 Hz, 1H), 5.94 (s, 1H), 3.85 (s, 3H), 3.80 (s, 3H), 3.53 – 3.41 (m, 2H), 2.84 – 2.67 (m, 2H); <sup>13</sup>C NMR (126 MHz, CDCl<sub>3</sub>) δ 168.7, 162.6, 160.6, 155.6, 138.9, 136.3, 132.7, 131.8, 130.9, 128.9, 128.7, 127.4, 126.5, 123.3, 113.1, 106.6, 104.1, 98.7, 58.8, 55.7, 55.7, 41.0, 35.6; HRMS (ESI) *m/z* calculated for C<sub>25</sub>H<sub>25</sub>N<sub>2</sub>O<sub>4</sub>S [M+H]<sup>+</sup>: 449.1530; found [M+H]<sup>+</sup>: 449.1531.

**6g: 2-(5-bromofuran-2-carbonyl)-5,7-dimethoxy-N-phenethyl-1,2-dihydroisoquinoline-1-carboxamide**

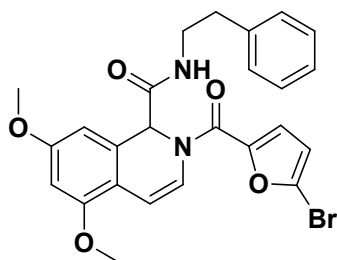

The product was synthesized according to procedure A in 1 mmol scale and purified by column chromatography using petroleum ether: ethyl acetate, afforded as yellow solid (260 mg, 51% yield), M.P.= 142 – 144 °C; <sup>1</sup>H NMR (500 MHz, CDCl<sub>3</sub>) δ 7.23 – 7.18 (m, 2H), 7.18 – 7.14 (m, 1H), 7.05 (d, *J* = 6.8 Hz, 3H), 6.84 – 6.78 (m, 1H), 6.48 (d, *J* = 3.6 Hz, 1H), 6.41 (d, *J* = 2.3 Hz, 1H), 6.38 (d, *J* = 2.3 Hz, 1H), 6.34 (d, *J* = 7.8 Hz, 1H), 6.25 (s, 1H), 5.94 (s, 1H), 3.84 (s, 3H), 3.79 (s, 3H), 3.45 (q, *J* = 6.6 Hz, 2H), 2.80 – 2.68 (m, 2H); <sup>13</sup>C NMR (126 MHz, CDCl<sub>3</sub>) δ 168.5, 160.6, 157.0, 155.6, 148.1, 138.8, 130.7, 128.9, 128.6, 127.1, 126.5, 122.2, 121.2, 113.8, 112.9, 107.0, 104.1, 98.7, 58.3, 55.7, 40.9, 35.5; HRMS (ESI) *m/z* calculated for C<sub>25</sub>H<sub>24</sub>BrN<sub>2</sub>O<sub>5</sub> [M+H]<sup>+</sup>: 511.0863; found [M+H]<sup>+</sup>: 511.0864.

**6h: N-benzyl-2-(cyclohexanecarbonyl)-5,6,7-trimethoxy-1,2-dihydroisoquinoline-1-carboxamide**

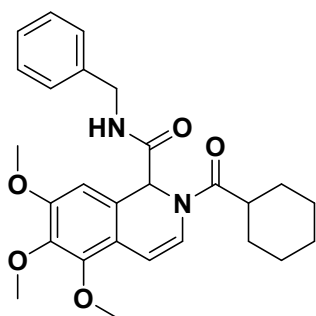

The product was synthesized according to procedure A in 1 mmol scale and purified by column chromatography using petroleum ether: ethyl acetate, afforded as semi-solid (153 mg, 33% yield); <sup>1</sup>H NMR (500 MHz, CDCl<sub>3</sub>) δ 7.30 – 7.24 (m, 3H), 7.18 – 7.13 (m, 2H), 6.72 – 6.67 (m, 1H), 6.64 (s, 1H), 6.41 (t, *J* = 5.8 Hz, 1H), 6.22 (d, *J* = 7.8 Hz, 1H), 6.11 (s, 1H), 4.42 – 4.30 (m, 2H), 3.90 (s, 3H), 3.86 (s, 3H), 3.84 (s, 3H), 2.68 – 2.57 (m, 1H), 1.85 – 1.64 (m, 5H), 1.55 – 1.41 (m, 2H), 1.34 – 1.18 (m, 3H); <sup>13</sup>C NMR (126 MHz, CDCl<sub>3</sub>) δ 175.4, 169.3, 153.3, 148.8, 142.1, 138.2, 128.7, 127.5, 127.5, 124.5, 122.1, 117.5, 107.2, 105.8, 61.6, 61.1, 57.0, 56.3, 43.6, 41.0, 29.1, 25.8; HRMS (ESI) *m/z* calculated for C<sub>27</sub>H<sub>33</sub>N<sub>2</sub>O<sub>5</sub> [M+H]<sup>+</sup>: 465.2384; found [M+H]<sup>+</sup>: 465.2386.

**6i: N-benzyl-2-(3-bromopropanoyl)-5,6,7-trimethoxy-1,2-dihydroisoquinoline-1-carboxamide**

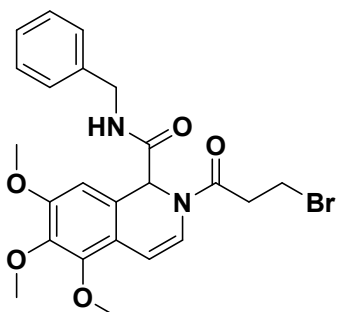

The product was synthesized according to procedure A in 1 mmol scale and purified by column chromatography using petroleum ether: ethyl acetate, afforded as white solid (210 mg, 43% yield), M.P.= 195 – 197 °C; <sup>1</sup>H NMR (500 MHz, CDCl<sub>3</sub>) δ 7.30 – 7.22 (m, 3H), 7.16 – 7.13 (m, 2H), 6.66 (s, 1H), 6.66 – 6.63 (m, 1H), 6.33 (t, *J* = 5.8 Hz, 1H), 6.28 (d, *J* = 7.8 Hz, 1H), 6.12 (s, 1H), 4.46 – 4.29 (m, 2H), 3.90 (s, 3H), 3.87 (s, 3H), 3.85 (s, 3H), 3.73 – 3.61 (m, 2H), 3.25 – 3.12 (m, 1H), 3.07 – 2.94 (m, 1H); <sup>13</sup>C NMR (126 MHz, CDCl<sub>3</sub>) δ 169.2, 168.7, 153.6, 149.0, 142.2, 137.9, 128.8, 127.6, 124.2, 121.5, 117.1, 107.3, 107.0, 61.6, 61.1, 57.2, 56.4, 43.8, 36.4, 26.5; HRMS (ESI) *m/z* calculated for C<sub>23</sub>H<sub>26</sub>BrN<sub>2</sub>O<sub>5</sub> [M+H]<sup>+</sup>: 489.1020; found [M+H]<sup>+</sup>: 489.1020.



**6j: 2-acetyl-5,6,7-trimethoxy-N-phenethyl-1,2-dihydroisoquinoline-1-carboxamide**

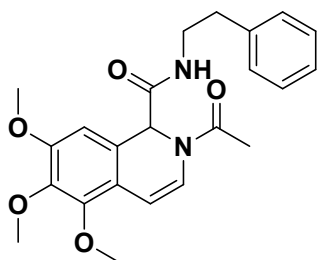

The product was synthesized according to procedure **B** in 1 mmol scale and purified by column chromatography using petroleum ether: ethyl acetate, afforded as yellow solid (69 mg, 16% yield), M.P.= 108 – 110 °C; <sup>1</sup>H NMR (500 MHz, CDCl<sub>3</sub>) δ 7.29 – 7.27 (m, 2H), 7.23 – 7.19 (m, 1H), 7.08 – 7.04 (m, 2H), 6.56 (s, 1H), 6.52 (d, *J* = 7.9 Hz, 1H), 6.18 (d, *J* = 7.9 Hz, 1H), 6.02 (s, 1H), 5.95 (t, *J* = 6.0 Hz, 1H), 3.89 (s, 3H), 3.87 (s, 3H), 3.82 (s, 3H), 3.49 – 3.38 (m, 2H), 2.79 – 2.66 (m, 2H), 2.21 (s, 3H); <sup>13</sup>C NMR (126 MHz, CDCl<sub>3</sub>) δ 169.3, 168.9, 153.0, 148.5, 141.8, 138.6, 128.6, 128.4, 126.3, 124.0, 122.9, 117.0, 107.0, 105.1, 61.3, 60.8, 56.7, 56.0, 40.6, 35.1, 21.2; HRMS (ESI) *m/z* calculated for C<sub>23</sub>H<sub>26</sub>N<sub>2</sub>O<sub>5</sub>Na [M+Na]<sup>+</sup>: 433.1733; found [M+Na]<sup>+</sup>: 433.1728.

**8a: N-(6,7,8-trimethoxy-2-oxo-3-phenethyl-2,3-dihydro-1H-benzo[d]azepin-1-yl) pivalamide**

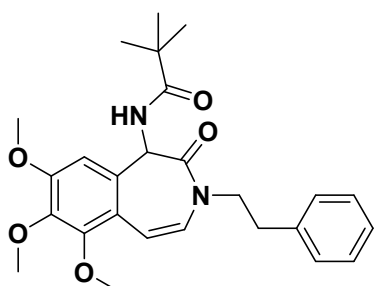

The product was synthesized according to procedure **B** in 1 mmol scale and purified by column chromatography using petroleum ether: ethyl acetate, afforded as white solid (235 mg, 52% yield), M.P.= 111 – 112 °C; <sup>1</sup>H NMR (500 MHz, CDCl<sub>3</sub>) δ 7.44 (d, *J* = 6.1 Hz, 1H), 7.19 – 7.09 (m, 3H), 7.05 – 6.97 (m, 2H), 6.69 (d, *J* = 9.0 Hz, 1H), 6.49 (s, 1H), 6.14 (d, *J* = 9.1 Hz, 1H), 4.95 (d, *J* = 6.0 Hz, 1H), 4.14 – 3.98 (m, 1H), 3.89 (s, 3H), 3.85 (s, 3H), 3.82 (s, 3H), 3.60 – 3.46 (m, 1H), 2.83 – 2.70 (m, 2H), 1.34 (s, 9H); <sup>13</sup>C NMR (126 MHz, CDCl<sub>3</sub>) δ 177.7, 165.8, 155.0, 150.2, 140.9, 137.9, 130.3, 128.8, 128.5, 127.0, 126.5, 118.8, 114.7, 101.2, 61.2, 60.9, 55.7, 54.0, 49.8, 39.0, 34.6, 27.7; HRMS (ESI) *m/z* calculated for C<sub>26</sub>H<sub>33</sub>N<sub>2</sub>O<sub>5</sub> [M+H]<sup>+</sup>: 453.2384; found [M+H]<sup>+</sup>: 453.2382.

**8b: N-(7,8-dimethoxy-2-oxo-3-phenethyl-2,3-dihydro-1H-benzo[d]azepin-1-yl) pivalamide**

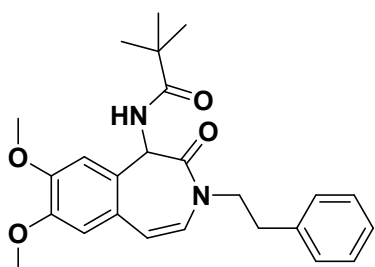

The product was synthesized according to procedure **B** in 1 mmol scale and purified by column chromatography using petroleum ether: ethyl acetate, afforded as semi-solid (190 mg, 45% yield); <sup>1</sup>H NMR (500 MHz, CDCl<sub>3</sub>) δ 7.46 (d, *J* = 5.9 Hz, 1H), 7.18 – 7.11 (m, 3H), 7.03 – 6.92 (m, 2H), 6.69 (d, *J* = 10.7 Hz, 2H), 6.43 (d, *J* = 8.9 Hz, 1H), 6.07 (d, *J* = 8.9 Hz, 1H), 4.95 (d, *J* = 6.0 Hz, 1H), 4.16 – 4.03 (m, 1H), 3.88 (s, 3H), 3.85 (s, 3H), 3.56 – 3.43 (m, 1H), 2.84 – 2.68 (m, 2H), 1.35 (s, 9H); <sup>13</sup>C NMR (126 MHz, CDCl<sub>3</sub>) δ 177.7, 166.0, 150.6, 148.3, 138.1, 128.9, 128.5, 127.2, 126.9, 126.5, 124.6, 118.8, 110.0, 105.4, 56.2, 55.8, 53.9, 50.2, 39.1, 34.7, 27.8; HRMS (ESI) *m/z* calculated for C<sub>25</sub>H<sub>31</sub>N<sub>2</sub>O<sub>4</sub> [M+H]<sup>+</sup>: 423.2278; found [M+H]<sup>+</sup>: 423.2278.

**8c: N-(6,8-dimethoxy-2-oxo-3-phenethyl-2,3-dihydro-1H-benzo[d]azepin-1-yl)pivalamide**

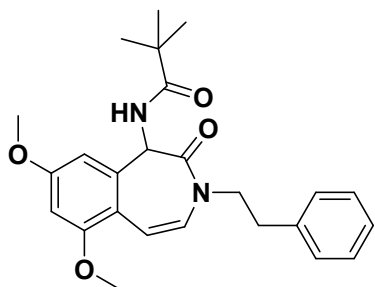

The product was synthesized according to procedure **B** in 1 mmol scale and purified by column chromatography using petroleum ether: ethyl acetate, afforded as white solid (181 mg, 43% yield), M.P.= 156 – 158 °C; <sup>1</sup>H NMR (500 MHz, CDCl<sub>3</sub>) δ 7.44 (d, *J* = 6.2 Hz, 1H), 7.19 – 7.12 (m, 3H), 7.05 – 6.96 (m, 2H), 6.69 (d, *J* = 9.0 Hz, 1H), 6.40 (d, *J* = 2.2 Hz, 1H), 6.33 (d, *J* = 2.1 Hz, 1H), 6.09 (d, *J* = 9.0 Hz, 1H), 4.99 (d, *J* = 6.2 Hz, 1H), 4.09 – 3.99 (m, 1H), 3.84 (s, 3H), 3.78 (s, 3H), 3.56 – 3.44 (m, 1H), 2.81 – 2.72 (m, 2H), 1.34 (s, 9H); <sup>13</sup>C NMR (126 MHz, CDCl<sub>3</sub>) δ 177.7, 165.8, 162.1, 157.5, 138.1, 137.0, 128.9, 128.5, 126.5, 114.9, 114.4, 106.0, 98.3, 97.5, 55.7, 55.4, 54.3, 49.9, 39.1, 34.6, 27.7; HRMS (ESI) *m/z* calculated for C<sub>25</sub>H<sub>31</sub>N<sub>2</sub>O<sub>4</sub> [M+H]<sup>+</sup>: 423.2278; found [M+H]<sup>+</sup>: 423.2279.

**8d: N-(6-oxo-7-phenethyl-6,7-dihydro-5H-[1,3]dioxolo[4',5':4,5]benzo[1,2-d]azepin-5-yl)pivalamide**

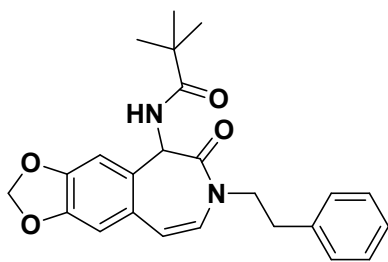

The product was synthesized according to procedure **B** in 1 mmol scale and purified by column chromatography using petroleum ether: ethyl acetate, afforded as white solid (159 mg, 39% yield), M.P.= 142 – 143 °C; <sup>1</sup>H NMR (500 MHz, CDCl<sub>3</sub>) δ 7.26 – 7.18 (m, 3H), 7.12 – 7.07 (m, 2H), 6.79 (d, *J* = 1.3 Hz, 1H), 6.73 (s, 2H), 6.39 (s, 1H), 6.09 (s, 1H), 5.95 – 5.90 (m, 2H), 5.29 (d, *J* = 5.9 Hz, 1H), 3.86 – 3.71 (m, 2H), 2.88 (t, *J* = 7.0 Hz, 2H), 1.31 (s, 9H); <sup>13</sup>C NMR (126 MHz, CDCl<sub>3</sub>) δ 175.9, 164.7, 148.0, 147.5, 138.1, 129.1, 128.7, 126.8, 119.9, 113.6, 110.3, 108.4, 107.3, 101.2, 59.1, 48.1, 39.7, 34.7, 28.0, 27.9; HRMS (ESI) *m/z* calculated for C<sub>24</sub>H<sub>27</sub>N<sub>2</sub>O<sub>4</sub> [M+H]<sup>+</sup>: 407.1965; found [M+H]<sup>+</sup>: 407.1968.

**8e: N-(3-benzyl-6,8-dimethoxy-2-oxo-2,3-dihydro-1H-benzo[d]azepin-1-yl)pivalamide**

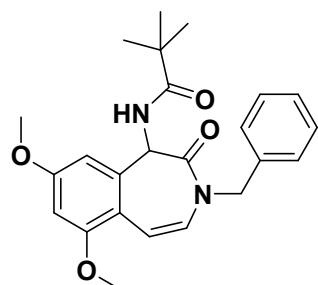

The product was synthesized according to procedure **B** in 1 mmol scale and purified by column chromatography using petroleum ether: ethyl acetate, afforded as white solid (176 mg, 41% yield), M.P.= 139 – 141 °C; <sup>1</sup>H NMR (500 MHz, CDCl<sub>3</sub>) δ 7.50 (d, *J* = 6.3 Hz, 1H), 7.29 – 7.21 (m, 3H), 7.12 – 7.08 (m, 2H), 6.75 (d, *J* = 9.0 Hz, 1H), 6.40 – 6.37 (m, 2H), 6.21 (d, *J* = 9.0 Hz, 1H), 5.12 (d, *J* = 6.2 Hz, 1H), 4.85 – 4.65 (m, 2H), 3.81 (s, 3H), 3.78 (s, 3H), 1.36 (s, 9H); <sup>13</sup>C NMR (126 MHz, CDCl<sub>3</sub>) δ 177.7, 166.3, 162.1, 157.6, 137.0, 136.1, 128.8, 127.7, 127.5, 126.0, 115.0, 114.4, 98.5, 97.7, 55.9, 55.3, 54.3, 51.0, 39.1, 27.8; HRMS (ESI) *m/z* calculated for C<sub>24</sub>H<sub>28</sub>N<sub>2</sub>O<sub>4</sub>Na [M+Na]<sup>+</sup>: 431.1941; found [M+Na]<sup>+</sup>: 431.1941.

**10a: 5-methoxy-N-phenethylisoquinoline-3-carboxamide**

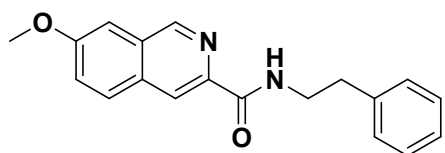

The product was synthesized according to procedure C in 1 mmol scale and purified by column chromatography using petroleum ether: ethyl acetate, afforded as grey solid (104 mg, 34% yield), M.P.= 147–149 °C; <sup>1</sup>H NMR (500 MHz, CDCl<sub>3</sub>) δ 9.01 (s, 1H), 8.54 (s, 1H), 8.27 (t, *J* = 6.1 Hz, 1H), 7.88 (d, *J* = 8.9 Hz, 1H), 7.42 – 7.38 (m, 1H), 7.36 – 7.21 (m, 6H), 3.97 (s, 3H), 3.83 – 3.76 (m, 2H), 2.99 (t, *J* = 7.3 Hz, 2H); <sup>13</sup>C NMR (126 MHz, CDCl<sub>3</sub>) δ 165.2, 159.8, 149.6, 142.3, 139.3, 131.6, 131.3, 129.8, 129.0, 128.7, 126.5, 124.2, 120.2, 105.1, 55.7, 41.0, 36.2; HRMS (ESI) *m/z* calculated for C<sub>19</sub>H<sub>19</sub>N<sub>2</sub>O<sub>2</sub> [M+H]<sup>+</sup>: 307.1441; found [M+H]<sup>+</sup>: 307.1441.

### 10b: 6-hydroxy-7-methoxy-*N*-phenethylisoquinoline-3-carboxamide

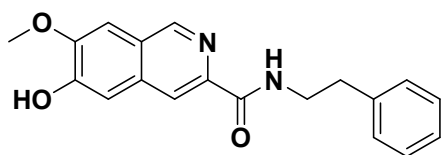

The product was synthesized according to procedure C in 1 mmol scale and purified by column chromatography using petroleum ether: ethyl acetate, afforded as white solid (125 mg, 39% yield), M.P.= 202–204 °C; <sup>1</sup>H NMR (500 MHz, CDCl<sub>3</sub>) δ 10.42 (s, 1H), 9.03 (s, 1H), 8.80 (t, *J* = 6.1 Hz, 1H), 8.25 (s, 1H), 7.58 (s, 1H), 7.33 (s, 1H), 7.32 – 7.24 (m, 4H), 7.22 – 7.16 (m, 1H), 3.96 (s, 3H), 3.62 – 3.54 (m, 2H), 2.89 (t, *J* = 7.5 Hz, 2H); <sup>13</sup>C NMR (126 MHz, CDCl<sub>3</sub>) δ 164.4, 151.7, 151.0, 148.6, 142.3, 139.5, 132.3, 128.6, 128.4, 126.1, 125.2, 117.7, 109.2, 106.2, 55.8, 40.3, 35.3; HRMS (ESI) *m/z* calculated for C<sub>19</sub>H<sub>19</sub>N<sub>2</sub>O<sub>3</sub> [M+H]<sup>+</sup>: 323.1390; found [M+H]<sup>+</sup>: 323.1391.

### 10c: *N*-cyclohexyl-9*H*-pyrido[3,4-*b*]indole-3-carboxamide

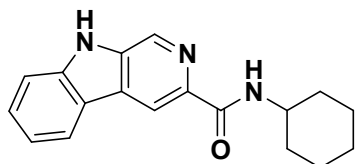

The product was synthesized according to procedure C in 1 mmol scale and purified by column chromatography using petroleum ether: ethyl acetate, afforded as light yellow solid (102 mg, 35% yield), M.P.= 253–254 °C; <sup>1</sup>H NMR (500 MHz, CDCl<sub>3</sub>) δ 11.93 (s, 1H), 8.88 (s, 1H), 8.83 (s, 1H), 8.39 (d, *J* = 7.9 Hz, 1H), 8.35 (d, *J* = 8.6 Hz, 1H), 7.65 (d, *J* = 8.2 Hz, 1H), 7.61 – 7.57 (m, 1H), 7.32 – 7.26 (m, 1H), 3.90 – 3.78 (m, 1H), 1.89 – 1.82 (m, 2H), 1.76 – 1.70 (m, 2H), 1.64 – 1.57 (m, 1H), 1.46 – 1.31 (m, 4H), 1.24 – 1.13 (m, 1H); <sup>13</sup>C NMR (126 MHz, CDCl<sub>3</sub>) δ 163.5, 141.0, 139.7, 137.1, 132.1, 128.5, 128.2, 122.2, 120.9, 119.9, 113.8, 112.2, 47.6, 32.4, 25.1, 24.7; HRMS (ESI) *m/z* calculated for C<sub>18</sub>H<sub>20</sub>N<sub>3</sub>O [M+H]<sup>+</sup>: 294.1601; found [M+H]<sup>+</sup>: 294.1600.

### 10d: *N*-phenethyl-9*H*-pyrido[3,4-*b*]indole-3-carboxamide

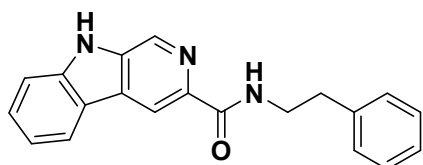

The product was synthesized according to procedure C in 1 mmol scale and purified by column chromatography using petroleum ether: ethyl acetate, afforded as yellow solid (116 mg, 37% yield), M.P.= 196–198 °C; <sup>1</sup>H NMR (500 MHz, DMSO-*d*<sub>6</sub>) δ 11.95 (s, 1H), 8.88 (s, 1H), 8.84 (s, 1H), 8.74 (t, *J* = 6.0 Hz, 1H), 8.39 (d, *J* = 7.9 Hz, 1H), 7.65 (d, *J* = 8.2 Hz, 1H), 7.63 – 7.55 (m, 1H), 7.34 – 7.25 (m, 5H), 7.24 – 7.18 (m, 1H), 3.65 – 3.57 (m, 2H), 2.91 (t, *J* = 7.5 Hz, 2H); <sup>13</sup>C NMR (126 MHz, DMSO-*d*<sub>6</sub>) δ 164.6, 141.0, 139.7, 139.5, 137.1, 132.3, 128.6, 128.4, 128.2, 126.1,

122.3, 121.0, 120.0, 113.9, 112.3, 40.3, 35.4; HRMS (ESI)  $m/z$  calculated for  $C_{20}H_{18}N_3O$   $[M+H]^+$ : 316.1444; found  $[M+H]^+$ : 316.1444.

**12a: *N*-(2,2-dimethoxyethyl)-4-methyl-*N*-((1-phenethyl-1*H*-tetrazol-5-yl)(3,4,5-trimethoxyphenyl)methyl)benzenesulfonamide**

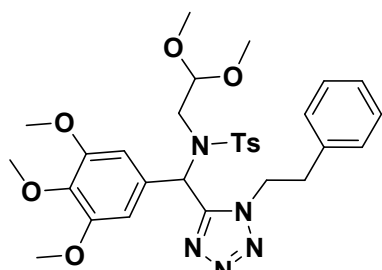

The product was synthesized according to procedure **D** in 2 mmol scale and purified by column chromatography using petroleum ether: ethyl acetate, afforded as semi-solid (830 mg, 68% yield);  $^1H$  NMR (500 MHz,  $CDCl_3$ )  $\delta$  7.44 (d,  $J = 8.3$  Hz, 2H), 7.23 – 7.12 (m, 6H), 7.09 – 7.05 (m, 1H), 6.11 (s, 1H), 5.96 (s, 2H), 4.61 (dd,  $J = 8.0, 6.0$  Hz, 2H), 4.22 (dd,  $J = 6.4, 4.0$  Hz, 1H), 3.78 (s, 3H), 3.60 (s, 6H), 3.58 – 3.53 (m, 1H), 3.47 – 3.41 (m, 1H), 3.21 (s, 3H), 3.27 – 3.15 (m, 2H), 3.08 (s, 3H), 2.36 (s, 3H);  $^{13}C$  NMR (126 MHz,  $CDCl_3$ )  $\delta$  153.3, 152.7, 144.3, 138.4, 136.2, 135.6, 129.6, 128.9, 128.7, 127.6, 127.4, 105.8, 105.7, 103.2, 103.1, 60.9, 60.9, 56.1, 55.0, 54.9, 54.5, 53.9, 48.8, 47.7, 35.8, 21.6; HRMS (ESI)  $m/z$  calculated for  $C_{30}H_{37}N_5O_7SNa$   $[M+Na]^+$ : 634.2306; found  $[M+Na]^+$ : 634.2306.

**13a: 5,6,7-trimethoxy-1-(1-phenethyl-1*H*-tetrazol-5-yl)-2-tosyl-1,2-dihydro-isoquinoline**

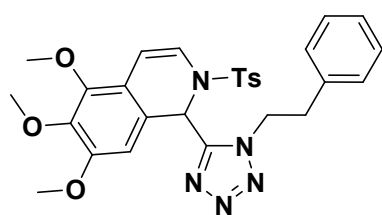

The product was synthesized according to procedure **E** in 0.5 mmol scale and purified by column chromatography using petroleum ether: ethyl acetate, afforded as yellow solid (172 mg, 63% yield), M.P. = 180–182 °C;  $^1H$  NMR (500 MHz,  $CDCl_3$ )  $\delta$  7.43 (d,  $J = 8.4$  Hz, 2H), 7.40 – 7.33 (m, 2H), 7.33 – 7.30 (m, 1H), 7.23 – 7.19 (m, 2H), 7.02 (d,  $J = 8.1$  Hz, 2H), 6.48 (d,  $J = 7.3$  Hz, 1H), 6.29 – 6.25 (m, 1H), 5.80 (s, 1H), 5.69 (s, 1H), 5.03 – 4.94 (m, 1H), 4.91 – 4.83 (m, 1H), 3.75 (s, 3H), 3.73 (s, 3H), 3.64 (s, 3H), 3.35 – 3.18 (m, 2H), 2.25 (s, 3H);  $^{13}C$  NMR (126 MHz,  $CDCl_3$ )  $\delta$  153.9, 153.1, 149.0, 144.6, 142.2, 136.9, 133.5, 129.7, 129.1, 128.9, 127.3, 127.1, 121.4, 121.1, 116.9, 114.5, 105.9, 61.3, 61.0, 56.4, 50.9, 48.9, 36.6, 21.6. HRMS (ESI)  $m/z$  calculated for  $C_{28}H_{30}N_5O_5S$   $[M+H]^+$ : 548.1962; found  $[M+H]^+$ : 548.1973.

**12b: *N*-((1-cyclohexyl-1*H*-tetrazol-5-yl)(2,5-dimethoxyphenyl)methyl)-*N*-(2,2-dimethoxyethyl)-4-methylbenzenesulfonamide**

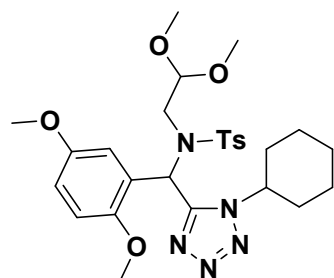

The product was synthesized according to procedure **D** in 2 mmol scale and purified by column chromatography using petroleum ether: ethyl acetate, afforded as yellow solid (658 mg, 59% yield), M.P. = 146 – 148 °C;  $^1H$  NMR (500 MHz,  $CDCl_3$ )  $\delta$  7.51 (d,  $J = 8.3$  Hz, 2H), 7.14 (d,  $J = 8.0$  Hz, 2H), 6.80 (s, 1H), 6.75 – 6.72 (m, 2H), 6.25 (d,  $J = 2.5$  Hz, 1H), 4.36 – 4.28 (m, 2H), 3.72 – 3.64 (m, 1H), 3.60 – 3.56 (m, 4H), 3.53 (s, 3H), 3.09 (s, 3H), 3.04 (s, 3H), 2.36 (s, 3H), 2.23 – 2.16 (m, 1H), 2.13 – 2.04 (m, 1H), 2.01 – 1.95 (m, 1H), 1.91 – 1.82 (m, 3H), 1.77 – 1.69 (m, 1H), 1.51 – 1.42 (m, 1H), 1.41 – 1.27 (m, 2H);  $^{13}C$  NMR (126 MHz,  $CDCl_3$ )  $\delta$  153.4, 152.8, 150.8, 143.9, 136.2, 129.4, 127.7, 123.6, 114.9, 111.9, 103.4, 57.9, 56.0, 55.6,

54.5, 53.4, 50.6, 48.3, 33.0, 32.3, 25.4, 21.6; HRMS (ESI)  $m/z$  calculated for  $C_{27}H_{37}N_5O_6SNa$   $[M+Na]^+$ : 582.2357; found  $[M+Na]^+$ : 582.2354.

**13b: 1-(1-cyclohexyl-1H-tetrazol-5-yl)-5,8-dimethoxy-2-tosyl-1,2-dihydroisoquinoline**

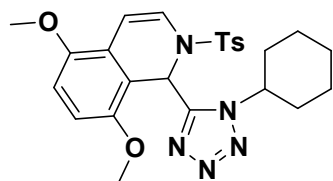

The product was synthesized according to procedure **E** in 0.5 mmol scale and purified by column chromatography using petroleum ether: ethyl acetate, afforded as yellow solid (213 mg, 86% yield), M.P.= 141 – 143 °C;  $^1H$  NMR (500 MHz,  $CDCl_3$ )  $\delta$  7.52 – 7.49 (m, 2H), 7.06 (d,  $J$  = 8.0 Hz, 2H), 6.88 (s, 1H), 6.66 – 6.59 (m, 3H), 6.49 – 6.46 (m, 1H), 4.99 – 4.90 (m, 1H), 3.70 (s, 3H), 3.69 (s, 3H), 2.28 (s, 3H), 2.23 – 2.16 (m, 1H), 2.10 – 1.95 (m, 5H), 1.85 – 1.77 (m, 1H), 1.65 – 1.53 (m, 2H), 1.42 – 1.31 (m, 1H);  $^{13}C$  NMR (126 MHz,  $CDCl_3$ )  $\delta$  151.8, 148.7, 148.5, 144.3, 134.8, 129.4, 126.9, 123.0, 120.1, 116.0, 112.5, 111.3, 110.4, 58.1, 56.2, 55.9, 45.1, 33.3, 33.2, 25.7, 25.4, 25.1, 21.6; HRMS (ESI)  $m/z$  calculated for  $C_{25}H_{29}N_5O_4SNa$   $[M+Na]^+$ : 518.1833; found  $[M+Na]^+$ : 518.1835.

**12c: 2-(5-(((N-(2,2-dimethoxyethyl)-4-methylphenyl)sulfonamido)(2,5-dimethoxyphenyl)methyl)-1H-tetrazol-1-yl)-N-(4-fluorobenzyl)acetamide**

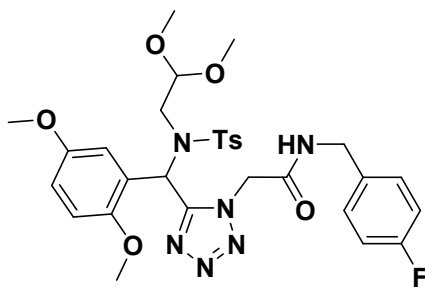

The product was synthesized according to procedure **D** in 2 mmol scale and purified by column chromatography using petroleum ether: ethyl acetate, afforded as white solid (786 mg, 46% yield), M.P.= 148 – 150 °C;  $^1H$  NMR (500 MHz,  $CDCl_3$ )  $\delta$  7.48 (d,  $J$  = 8.0 Hz, 2H), 7.28 – 7.23 (m, 2H), 7.15 (d,  $J$  = 8.0 Hz, 2H), 6.99 – 6.92 (m, 2H), 6.76 – 6.71 (m, 2H), 6.70 – 6.66 (m, 2H), 6.17 (d,  $J$  = 2.9 Hz, 1H), 5.17 (d,  $J$  = 16.6 Hz, 1H), 5.07 (d,  $J$  = 16.6 Hz, 1H), 4.53 – 4.38 (m, 2H), 4.31 (m, 1H), 3.59 – 3.55 (m, 2H), 3.53 (s, 3H), 3.42 (s, 3H), 3.09 (s, 3H), 2.98 (s, 3H), 2.38 (s, 3H);  $^{13}C$  NMR (126 MHz,  $CDCl_3$ )  $\delta$  163.9, 163.3, 161.4, 154.5, 153.4, 150.6, 144.3, 135.8, 133.4, 129.8, 129.6, 127.6, 122.3, 115.7, 114.7, 111.9, 103.2, 55.9, 55.5, 54.5, 53.7, 50.9, 50.8, 49.9, 48.1, 43.3, 21.6; HRMS (ESI)  $m/z$  calculated for  $C_{30}H_{35}FN_6O_7SNa$   $[M+Na]^+$ : 665.2164; found  $[M+Na]^+$ : 665.2164.

**13c: 2-(5-(5,8-dimethoxy-2-tosyl-1,2-dihydroisoquinolin-1-yl)-1H-tetrazol-1-yl)-N-(4-fluorobenzyl)acetamide**

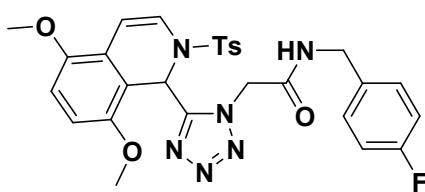

The product was synthesized according to procedure **E** in 0.5 mmol scale and purified by column chromatography using petroleum ether: ethyl acetate, afforded as yellow solid (208 mg, 72% yield), M.P.= 106 – 108 °C;  $^1H$  NMR (500 MHz,  $CDCl_3$ )  $\delta$  7.51 (d,  $J$  = 7.9 Hz, 2H), 7.32 – 7.27 (m, 2H), 7.09 (d,  $J$  = 7.9 Hz, 2H), 7.00 (t,  $J$  = 8.4 Hz, 2H), 6.76 (s, 1H), 6.65 (d,  $J$  = 8.8 Hz, 1H), 6.61 – 6.54 (m, 2H), 6.49 (d,  $J$  = 7.6 Hz, 1H), 6.44 (t,  $J$  = 5.8 Hz, 1H), 5.40 (s, 2H), 4.60 – 4.52 (m, 1H), 4.45 – 4.38 (m, 1H), 3.71 (s, 3H), 3.62 (s, 3H), 2.29 (s, 3H);  $^{13}C$  NMR (126 MHz, Chloroform- $d$ )  $\delta$  164.1, 163.4, 161.4, 153.8, 148.7, 148.6, 144.7, 134.4, 133.3, 129.9,

129.6, 126.9, 123.0, 119.7, 115.8, 115.6, 115.2, 111.6, 111.3, 110.7, 56.1, 50.2, 45.4, 43.4; HRMS (ESI)  $m/z$  calculated for  $C_{28}H_{27}FN_6O_5SNa$   $[M+Na]^+$ : 601.1639; found  $[M+Na]^+$ : 601.1637.

**12d: *N*-(2,2-dimethoxyethyl)-*N*-((2,5-dimethoxyphenyl)(1-phenethyl-1*H*-tetrazol-5-yl)methyl)-4-methylbenzenesulfonamide**

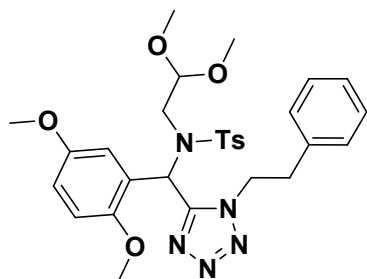

The product was synthesized according to procedure **D** in 2 mmol scale and purified by column chromatography using petroleum ether: ethyl acetate, afforded as light yellow solid (732 mg, 63% yield), M.P.= 143 – 144 °C;  $^1H$  NMR (500 MHz,  $CDCl_3$ )  $\delta$  7.53 – 7.49 (m, 2H), 7.31 – 7.19 (m, 5H), 7.14 (d,  $J$  = 7.9 Hz, 2H), 6.85 (s, 1H), 6.78 – 6.71 (m, 2H), 6.28 (d,  $J$  = 2.7 Hz, 1H), 4.65 – 4.52 (m, 2H), 4.31 (t,  $J$  = 5.2 Hz, 1H), 3.60 (d,  $J$  = 5.3 Hz, 2H), 3.57 (s, 3H), 3.54 (s, 3H), 3.26 – 3.18 (m, 2H), 3.09 (s, 3H), 3.07 (s, 3H), 2.37 (s, 3H);  $^{13}C$  NMR (126 MHz,  $CDCl_3$ )  $\delta$  153.5, 153.4, 150.8, 143.9, 136.5, 136.1, 129.4, 128.9, 127.7, 127.3, 123.0, 115.0, 114.7, 111.8, 103.5, 56.0, 55.6, 54.9, 53.5, 50.3, 50.2, 48.6, 48.2, 35.7, 21.6; HRMS (ESI)  $m/z$  calculated for  $C_{29}H_{36}N_5O_6S$   $[M+H]^+$ : 582.2381; found  $[M+H]^+$ : 582.2387.

**13d: 5,8-dimethoxy-1-(1-phenethyl-1*H*-tetrazol-5-yl)-2-tosyl-1,2-dihydro-isoquinoline**

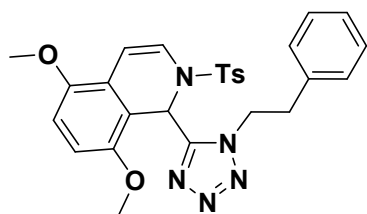

The product was synthesized according to procedure **E** in 0.5 mmol scale and purified by column chromatography using petroleum ether: ethyl acetate, afforded as white solid (219 mg, 85% yield), M.P.= 155 – 157 °C;  $^1H$  NMR (500 MHz,  $CDCl_3$ )  $\delta$  7.51 (d,  $J$  = 8.3 Hz, 2H), 7.40 – 7.34 (m, 4H), 7.32 – 7.27 (m, 1H), 7.06 (d,  $J$  = 8.0 Hz, 2H), 6.86 (d,  $J$  = 1.2 Hz, 1H), 6.67 – 6.57 (m, 3H), 6.44 (m, 1H), 4.99 – 4.79 (m, 2H), 3.71 (s, 3H), 3.65 (s, 3H), 3.37 (t,  $J$  = 8.1 Hz, 2H), 2.28 (s, 3H);  $^{13}C$  NMR (126 MHz,  $CDCl_3$ )  $\delta$  152.5, 148.7, 148.6, 144.4, 136.8, 134.6, 129.4, 129.2, 129.0, 127.2, 126.9, 122.9, 119.9, 115.7, 112.9, 111.3, 110.5, 56.1, 55.9, 49.0, 45.2, 36.1, 21.6; HRMS (ESI)  $m/z$  calculated for  $C_{27}H_{27}N_5O_4SNa$   $[M+Na]^+$ : 540.1676; found  $[M+Na]^+$ : 540.1677.

**14: 7-(2,2-dimethoxyethyl)-8-(3,5-dimethoxyphenyl)-7,8-dihydro-1,5-*a*pyrazin-6(5*H*)-one**

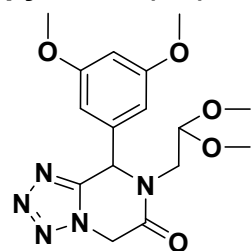

The product was synthesized according to procedure **F** in 3 mmol scale and purified by column chromatography using petroleum ether: ethyl acetate, afforded as colorless oil (675 mg, 62% yield);  $^1H$  NMR (500 MHz,  $CDCl_3$ )  $\delta$  6.41 – 6.39 (m, 3H), 6.33 (s, 1H), 5.37 – 5.27 (m, 1H), 5.17 – 5.07 (m, 1H), 4.54 – 4.49 (m, 1H), 4.31 – 4.26 (m, 1H), 3.77 (s, 6H), 3.40 (s, 3H), 3.38 (s, 3H), 2.93 – 2.85 (m, 1H);  $^{13}C$  NMR (126 MHz,  $CDCl_3$ )  $\delta$  161.9, 161.5, 137.4, 104.9, 103.1, 100.9, 57.8, 55.8, 55.7, 55.6, 55.0, 48.0, 47.0; HRMS (ESI)  $m/z$  calculated for  $C_{16}H_{22}N_5O_5$   $[M+H]^+$ : 364,1616; found  $[M+H]^+$ : 364,1617.

**15: 10,12-dimethoxy-13*bH*-tetrazolo[5',1':3,4]pyrazino[2,1-*a*]isoquinolin-6(5*H*)-one**

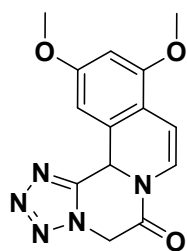

The product was synthesized according to procedure **G** in 1 mmol scale and purified by column chromatography using petroleum ether: ethyl acetate, afforded as white solid (276 mg, 92% yield), M.P.= 185 – 186 °C; <sup>1</sup>H NMR (500 MHz, CDCl<sub>3</sub>) δ 7.17 (d, *J* = 7.7 Hz, 1H), 7.10 (d, *J* = 2.2 Hz, 1H), 6.80 (d, *J* = 7.7 Hz, 1H), 6.46 (d, *J* = 2.2 Hz, 1H), 6.08 – 6.05 (m, 1H), 5.31 – 5.18 (m, 2H), 3.86 (s, 3H), 3.81 (s, 3H); <sup>13</sup>C NMR (126 MHz, CDCl<sub>3</sub>) δ 161.5, 157.8, 156.1, 146.8, 129.1, 121.7, 113.3, 112.2, 101.5, 99.1, 55.9, 55.8, 53.4, 47.7;

HRMS (ESI) *m/z* calculated for C<sub>14</sub>H<sub>14</sub>N<sub>5</sub>O<sub>3</sub> [M+H]<sup>+</sup>: 300.1091; found [M+H]<sup>+</sup>: 300.1095.

**6a: 2-(2-(4-chlorophenyl)acetyl)-5,6,7-trimethoxy-N-phenethyl-1,2-dihydro-isoquinoline-1-carboxamide**

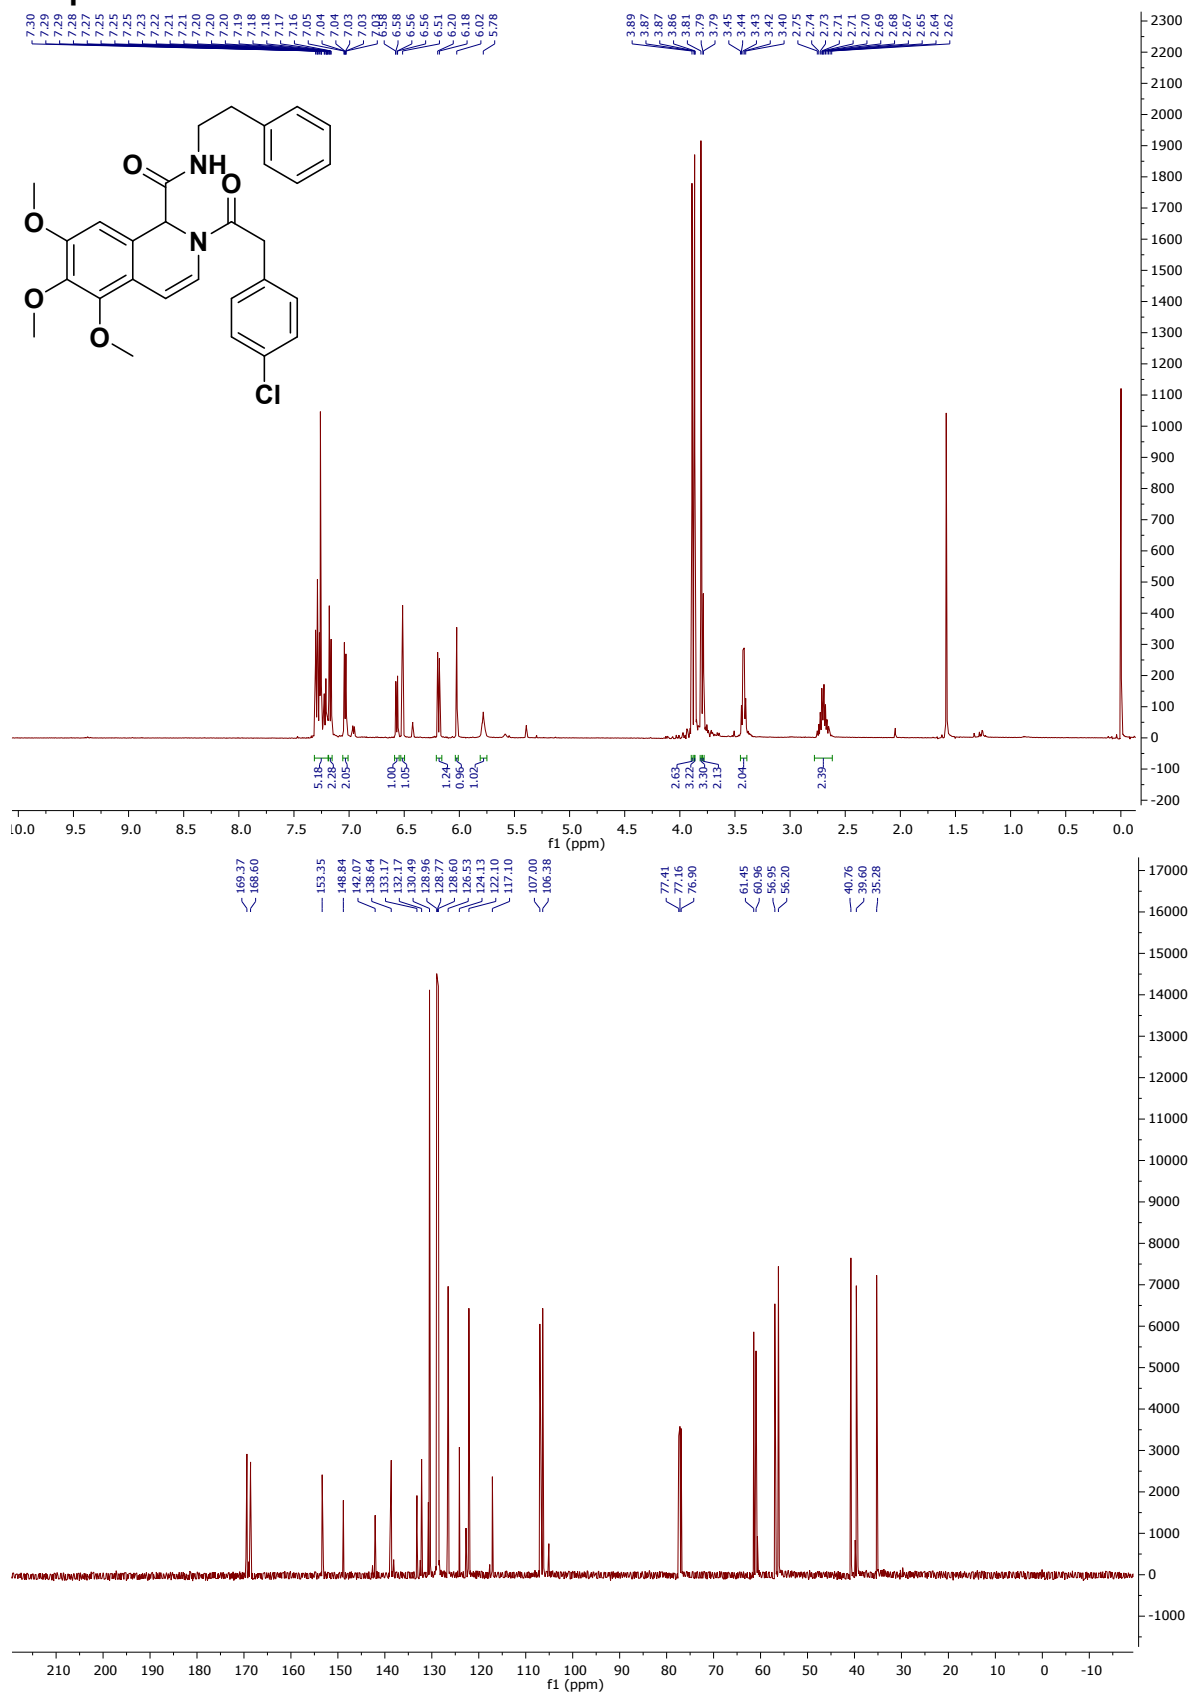



17mdv196-YZ321C #14 RT: 0.23991 AV: 1 NL: 9.03E6  
T: FTMS + p ESI Full ms [150.00-1000.00]

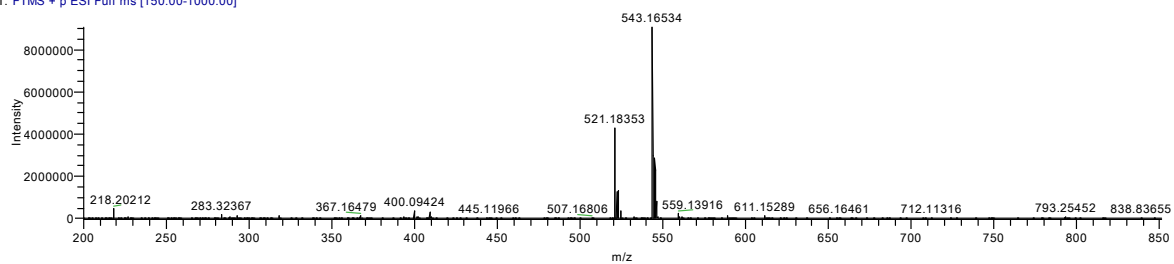

17mdv196-YZ321C #14 RT: 0.23991 AV: 1 NL: 9.03E6  
T: FTMS + p ESI Full ms [150.00-1000.00]

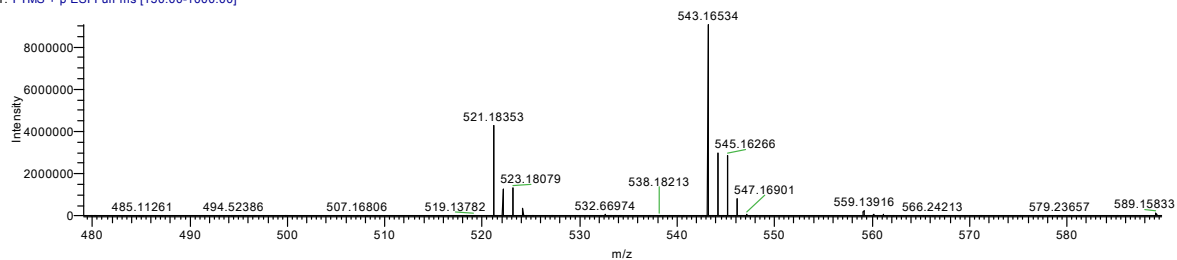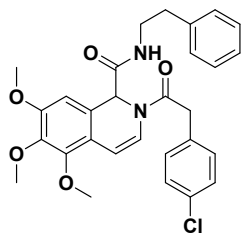

**Chemical Formula:**  $C_{29}H_{29}ClN_2O_5$   
**Exact Mass:** 520.1765  
**Molecular Weight:** 521.0100

**6b: 2-(3-bromopropanoyl)-5,6,7-trimethoxy-N-phenethyl-1,2-dihydroisoquinoline-1-carboxamide**

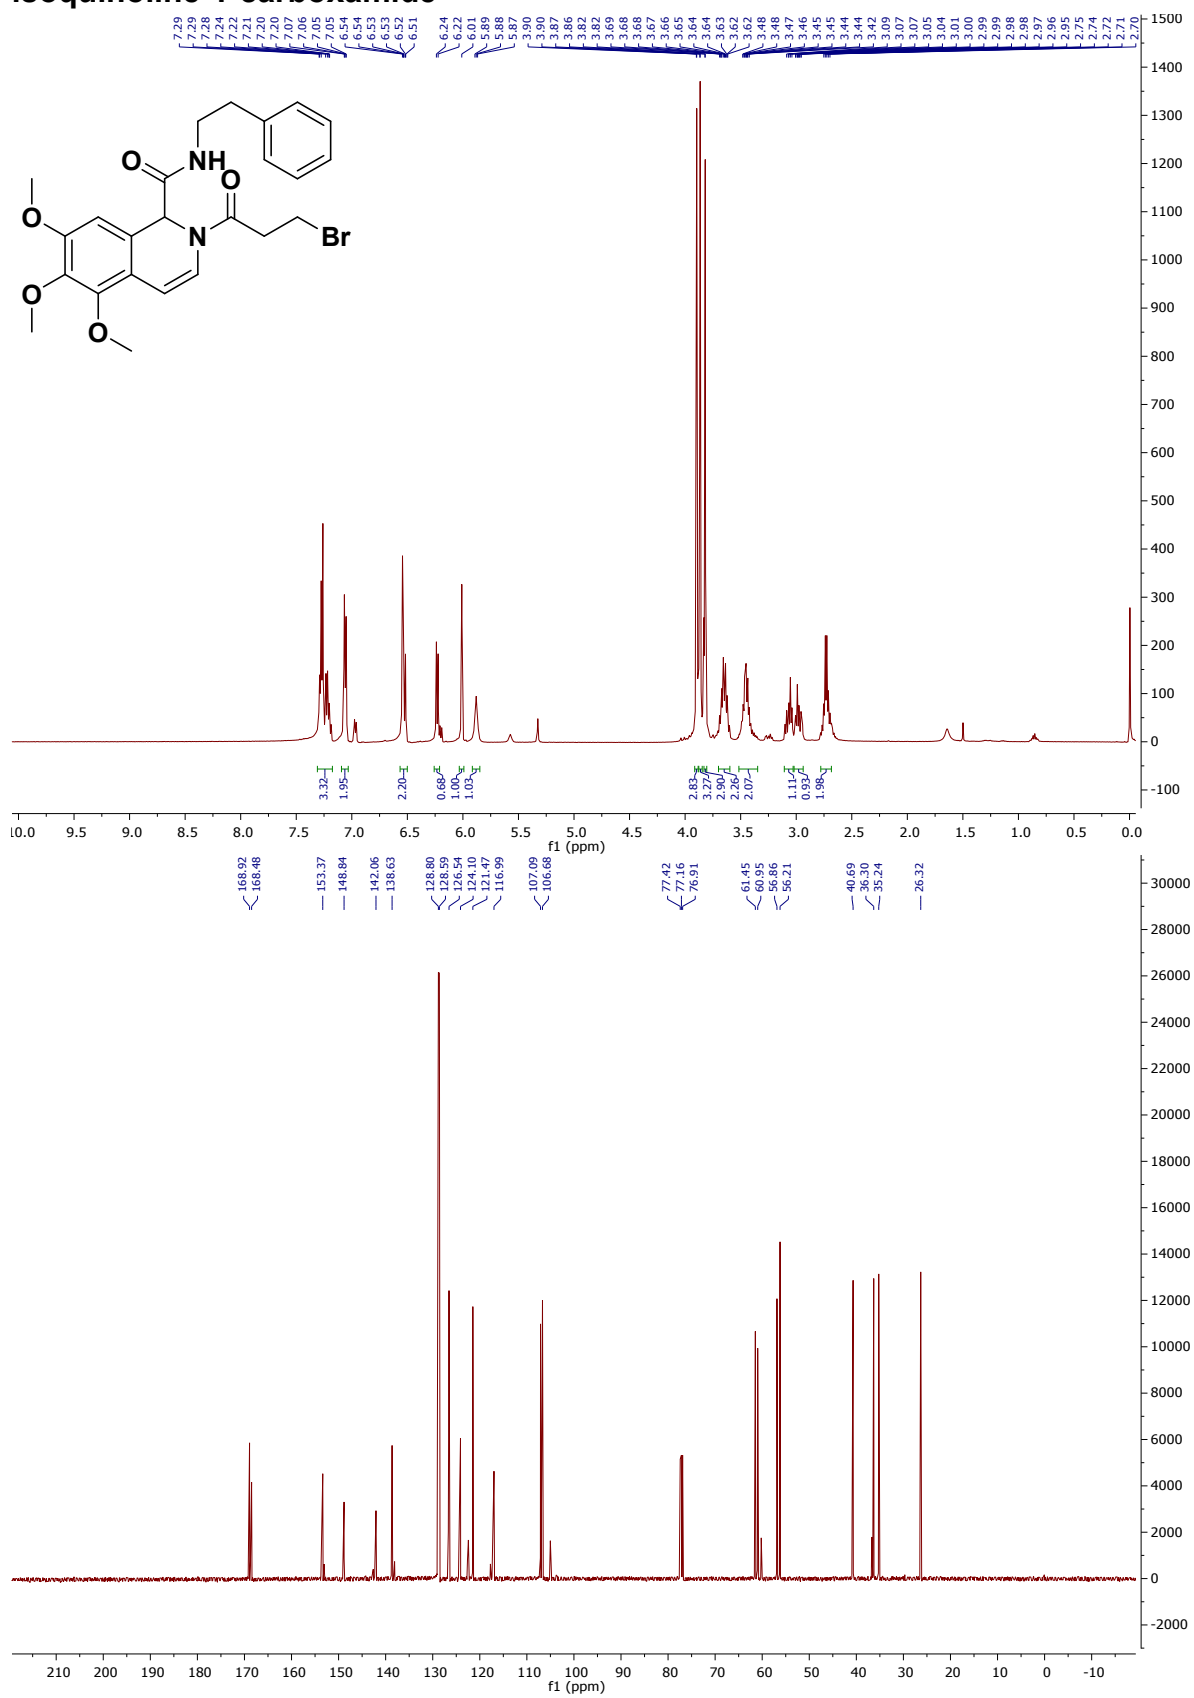

17mdv196-YZ322C #18-24 RT: 0.30329-0.41237 AV: 7 NL: 1.13E6  
T: FTMS + p ESI Full ms [150.00-1000.00]

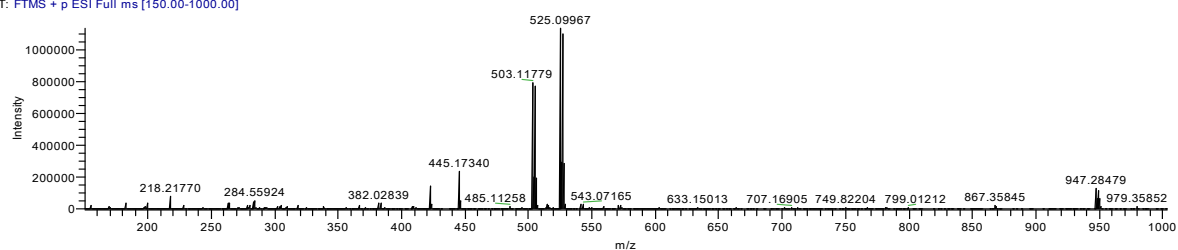

17mdv196-YZ322C #18-24 RT: 0.30329-0.41237 AV: 7 NL: 1.13E6  
T: FTMS + p ESI Full ms [150.00-1000.00]

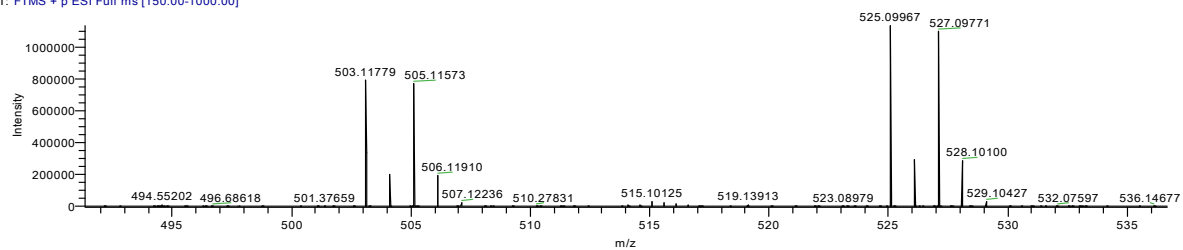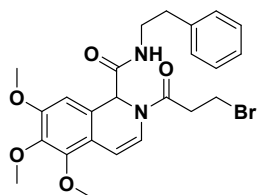

Chemical Formula:  $C_{24}H_{27}BrN_2O_5$

Exact Mass: 502.1103

Molecular Weight: 503.3930

**6c: 2-benzoyl-N-cyclohexyl-5,7-dimethoxy-1,2-dihydroisoquinoline-1-carboxamide**

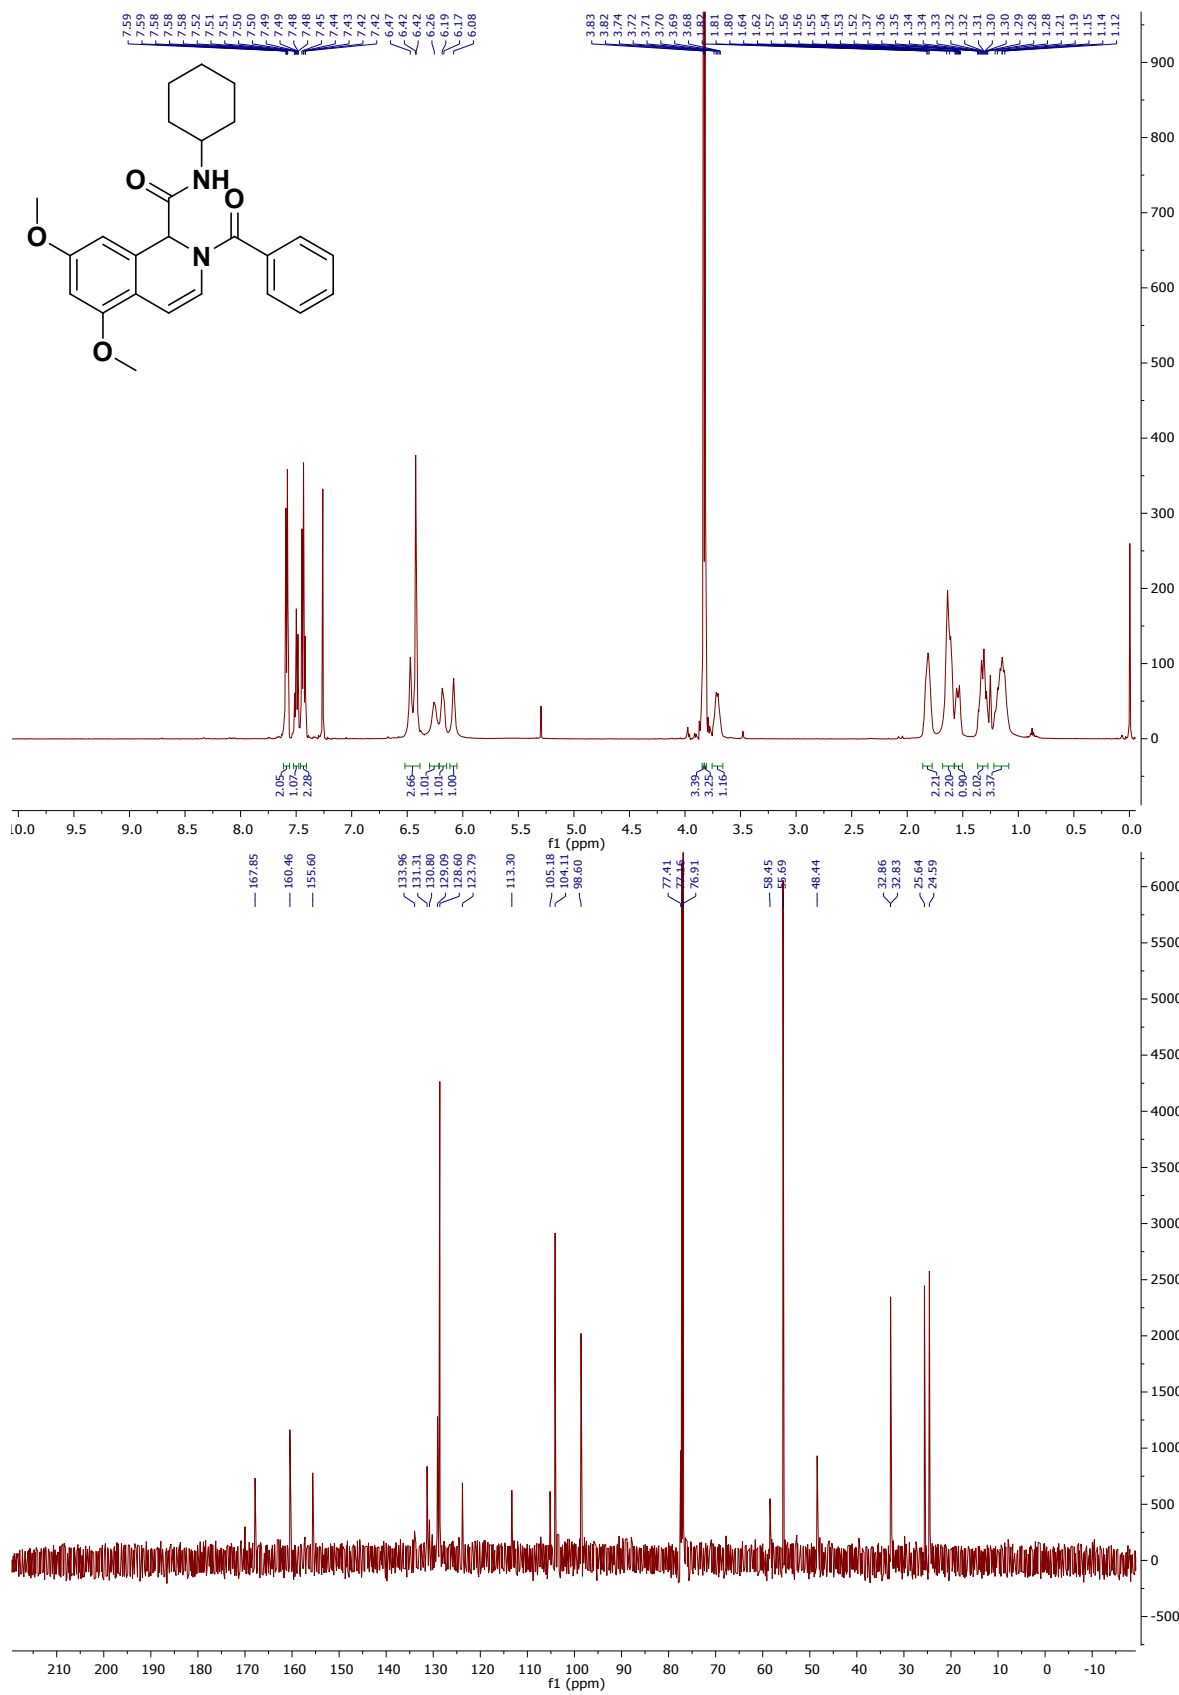

17mdv196-YZ370C #18-24 RT: 0.29839-0.40556 AV: 7 NL: 1.36E6  
T: FTMS + p ESI Full ms [150.00-1000.00]

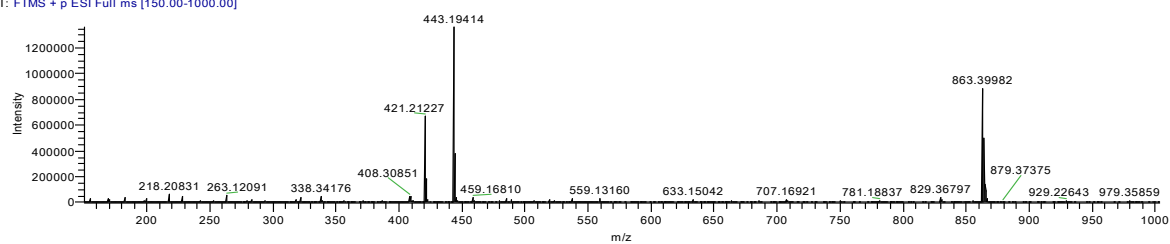

17mdv196-YZ370C #18-24 RT: 0.29839-0.40556 AV: 7 NL: 1.36E6  
T: FTMS + p ESI Full ms [150.00-1000.00]

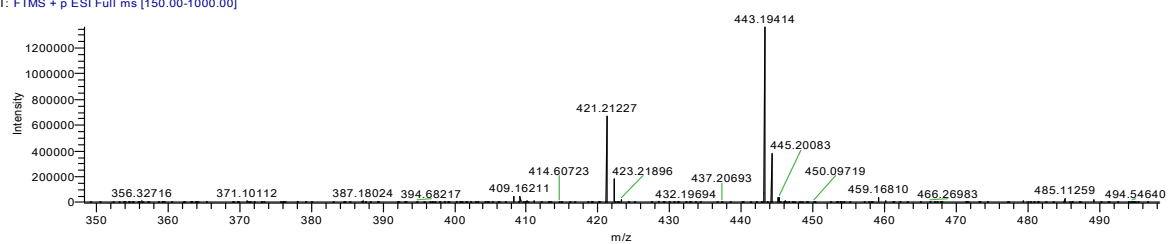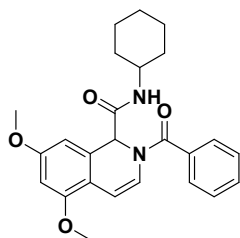

Chemical Formula:  $C_{25}H_{28}N_2O_4$

Exact Mass: 420.2049

Molecular Weight: 420.5090

**6d: 2-(3-bromobenzoyl)-N-cyclohexyl-6,7-dimethoxy-1,2-dihydroisoquinoline-1-carboxamide**

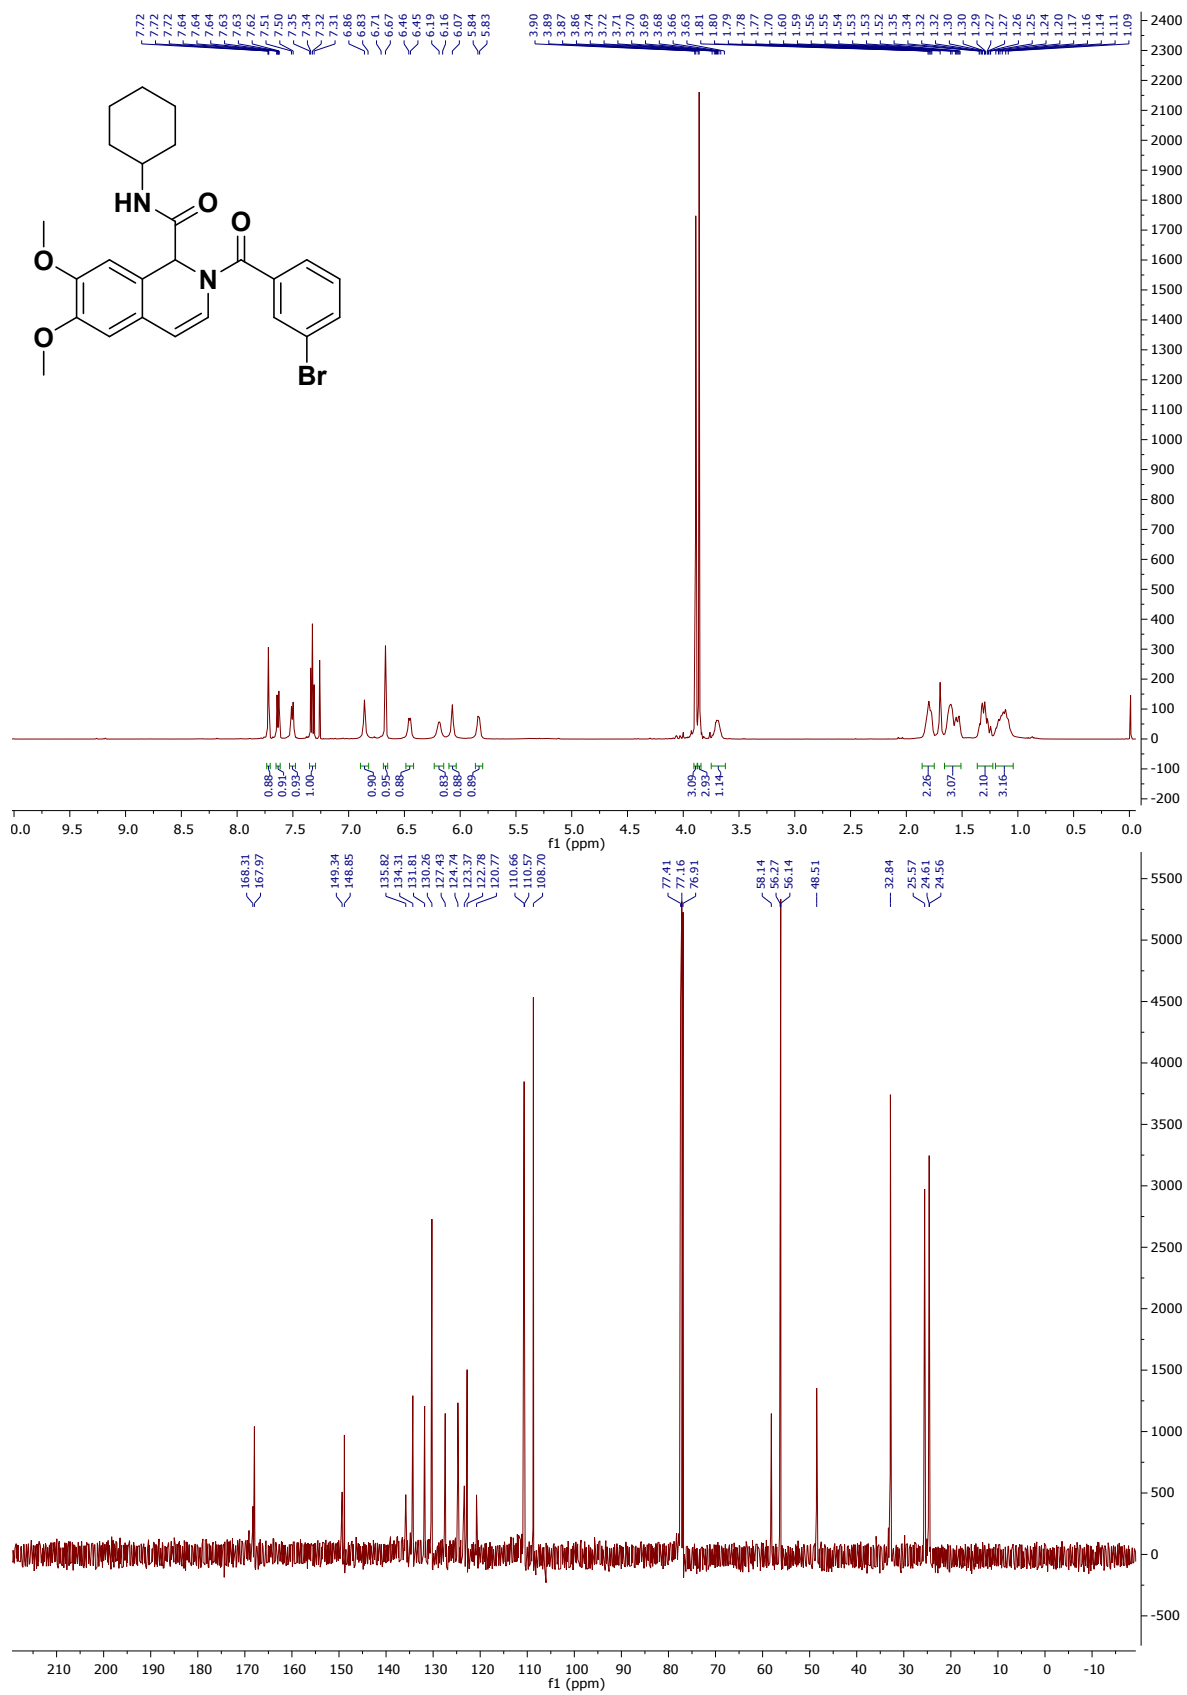

17mdv196-YZ376C #18-24 RT: 0.30002-0.41021 AV: 7 NL: 1.63E6  
T: FTMS + p ESI Full ms [150.00-1000.00]

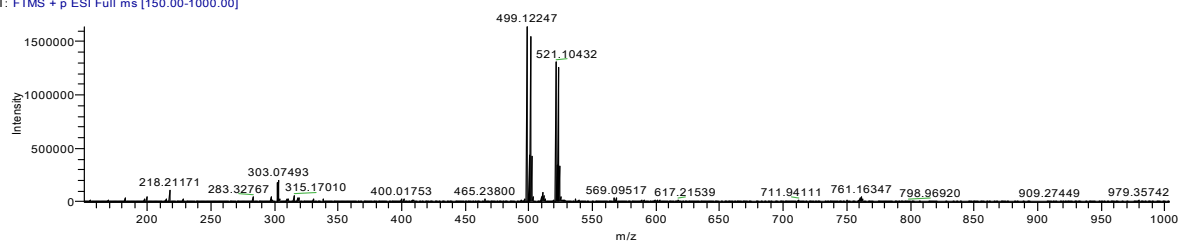

17mdv196-YZ376C #18-24 RT: 0.30002-0.41021 AV: 7 NL: 1.63E6  
T: FTMS + p ESI Full ms [150.00-1000.00]

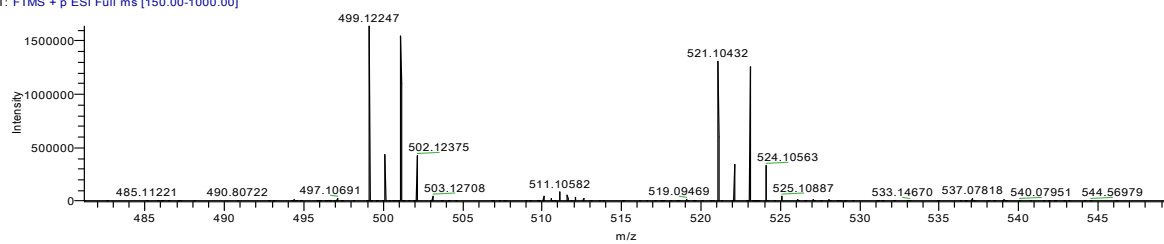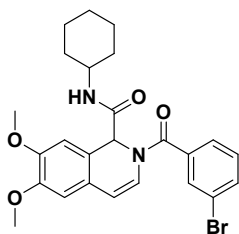

Chemical Formula:  $C_{25}H_{27}BrN_2O_4$

Exact Mass: 498.1154

Molecular Weight: 499.4050

**6e: *N*-benzyl-2-(3-bromopropanoyl)-5,6,7-trimethoxy-1,2-dihydroisoquinoline-1-carboxamide**

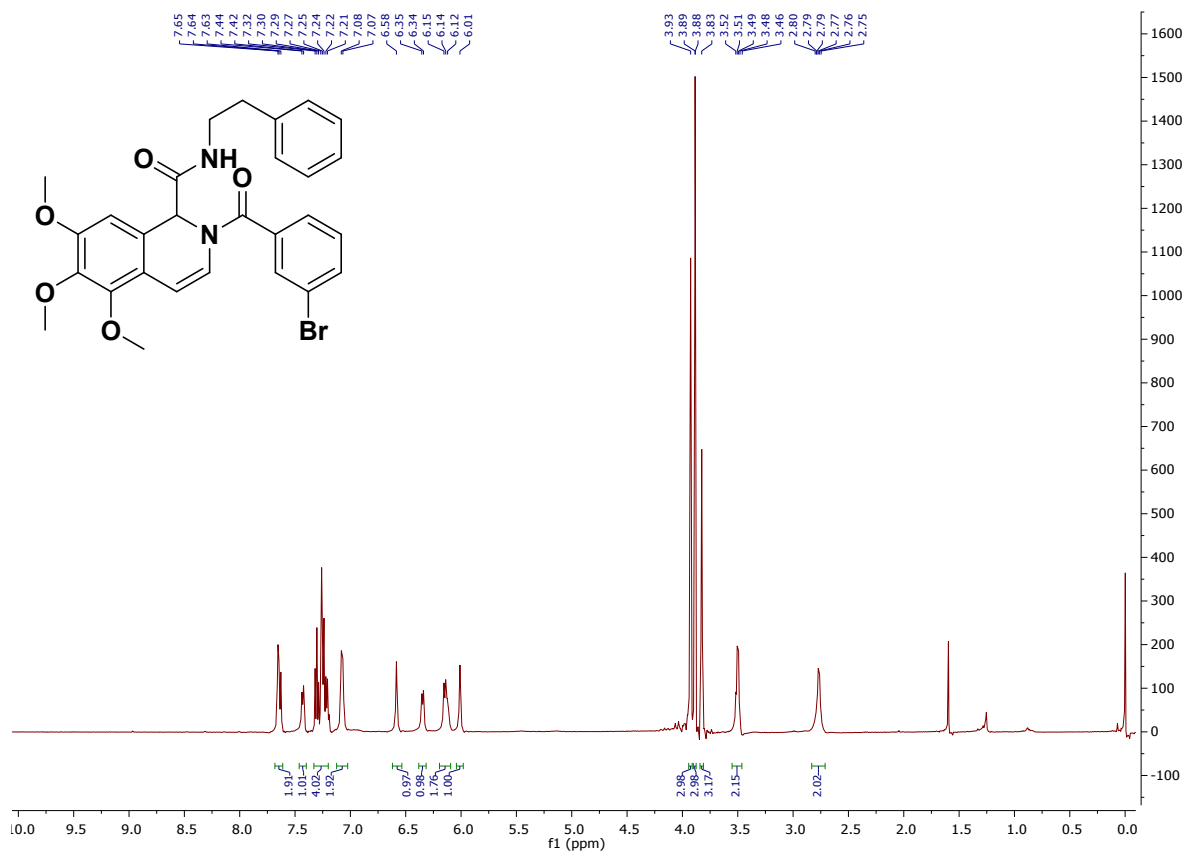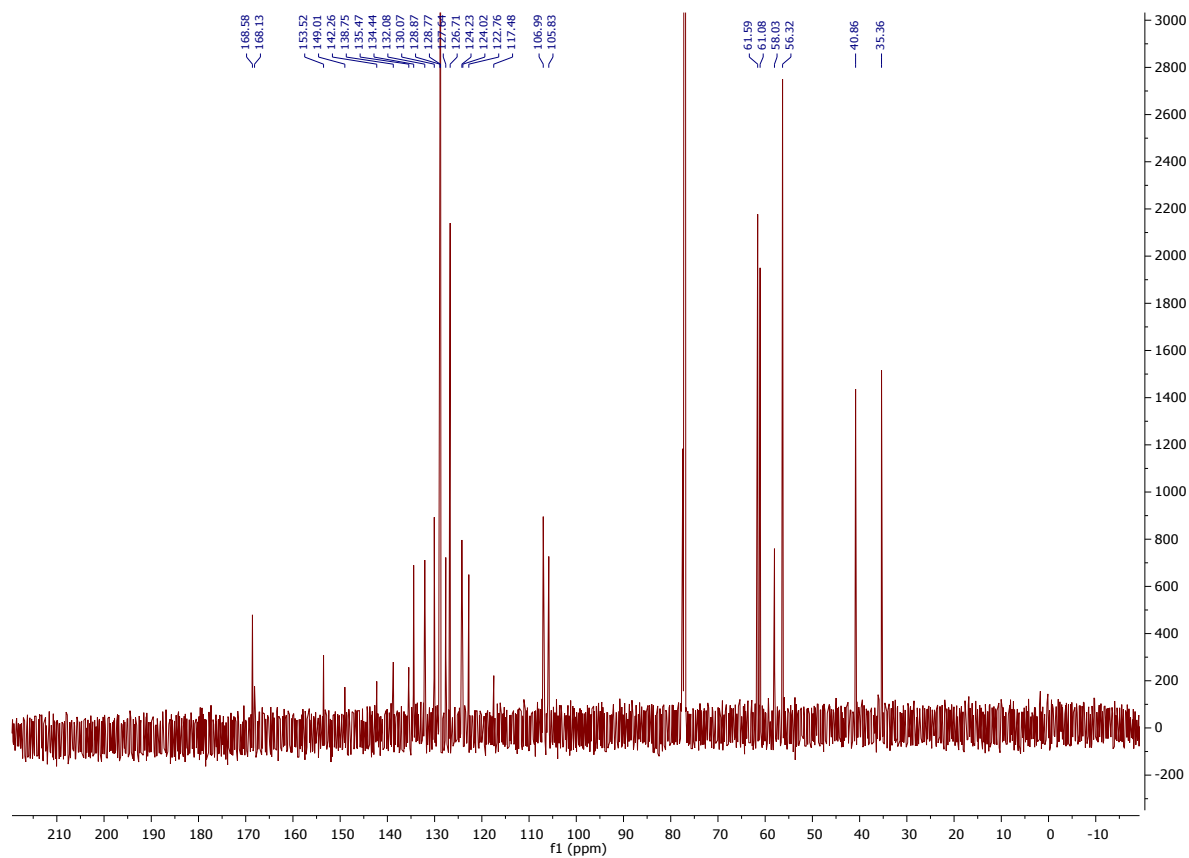



17mdv196-YZ323C #14 RT: 0.23913 AV: 1 NL: 8.20E6  
T: FTMS + p ESI Full ms [150.00-1000.00]

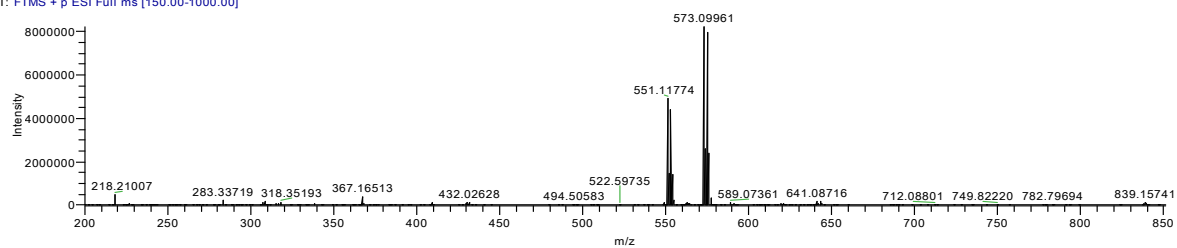

17mdv196-YZ323C #14 RT: 0.23913 AV: 1 NL: 8.20E6  
T: FTMS + p ESI Full ms [150.00-1000.00]

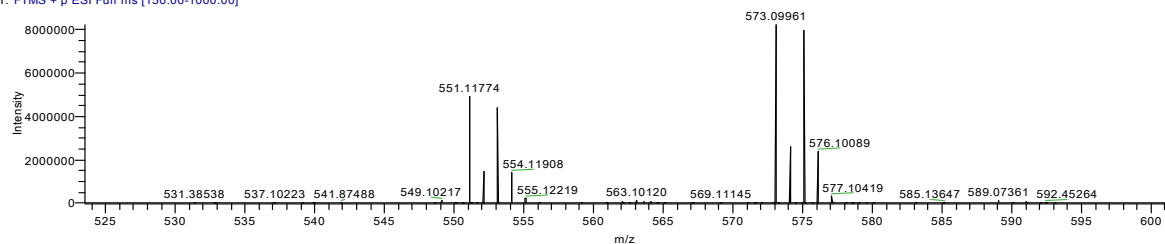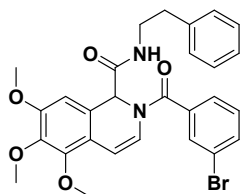

Chemical Formula:  $C_{28}H_{27}BrN_2O_5$

Exact Mass: 550.1103

Molecular Weight: 551.4370

**6f: 5,7-dimethoxy-N-phenethyl-2-(thiophene-2-carbonyl)-1,2-dihydroisoquinoline-1-carboxamide**

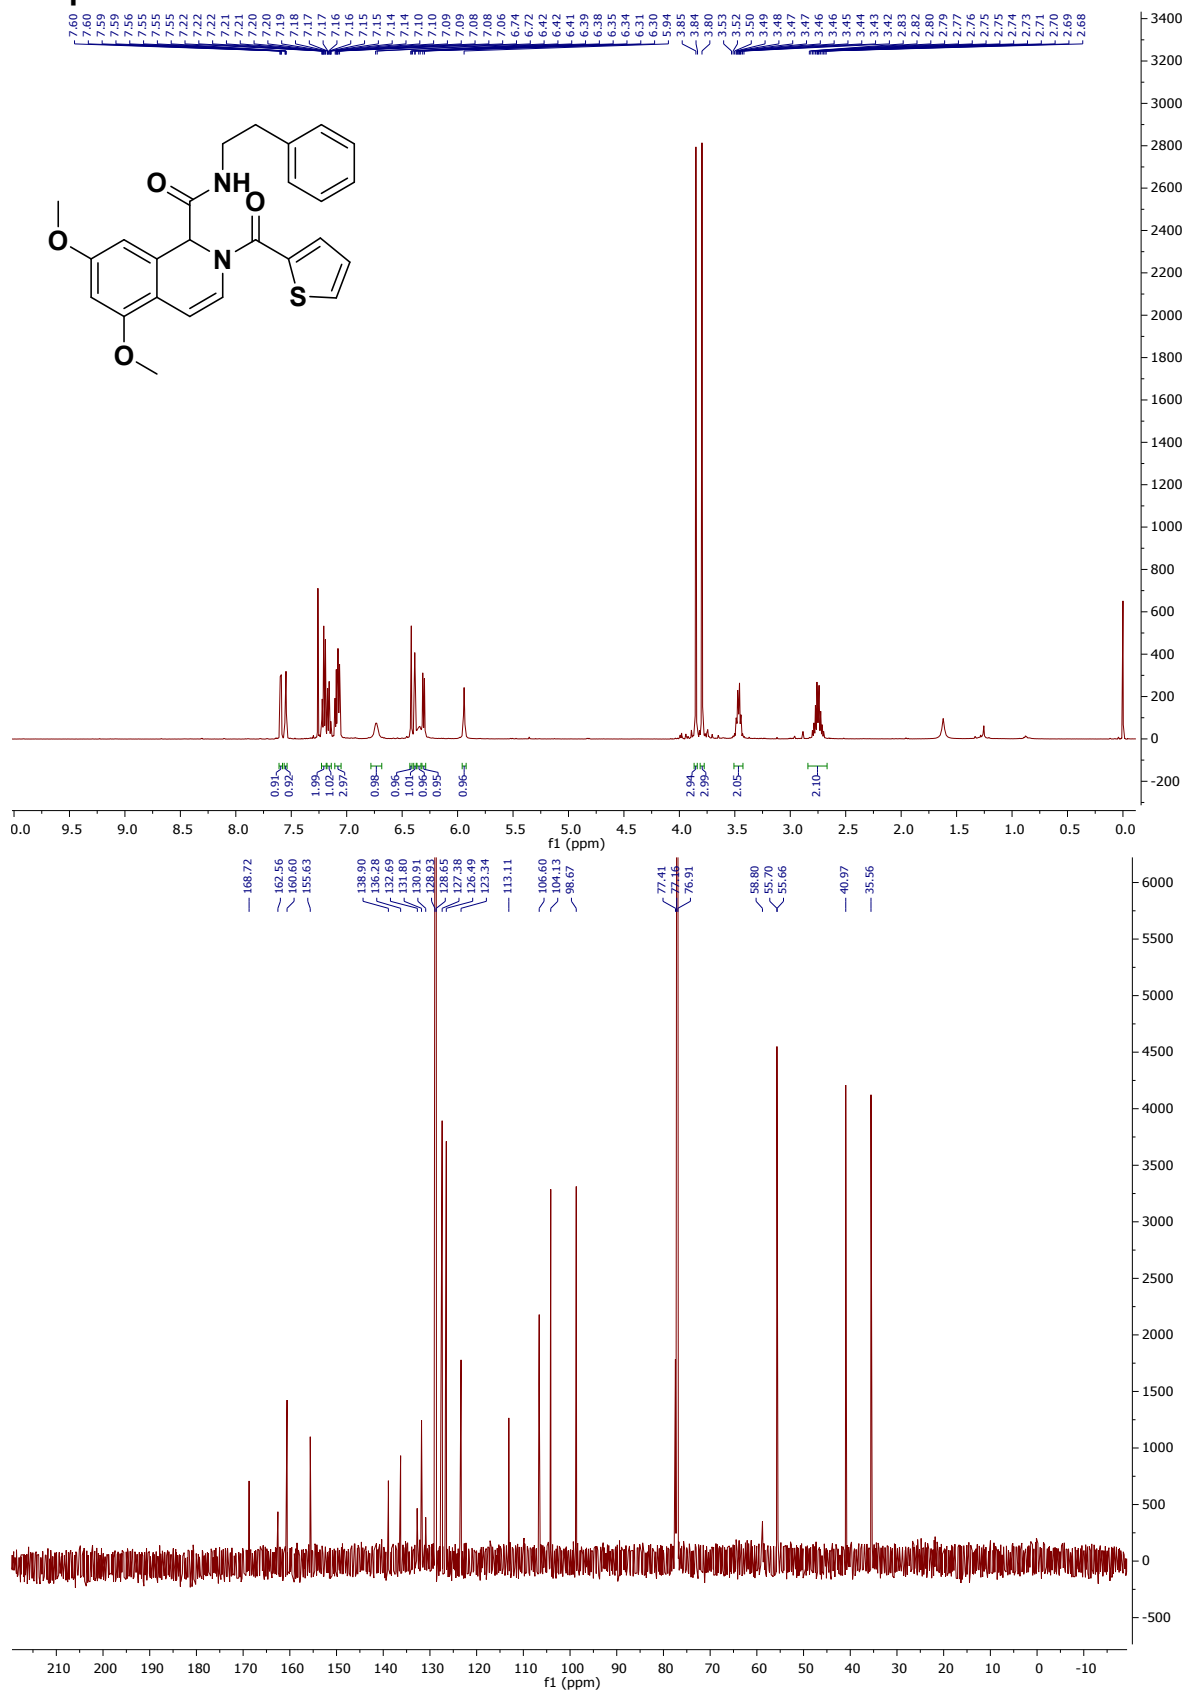

17mdv196-YZ354C #14 RT: 0.23082 AV: 1 NL: 7.19E6  
T: FTMS + p ESI Full ms [150.00-1000.00]

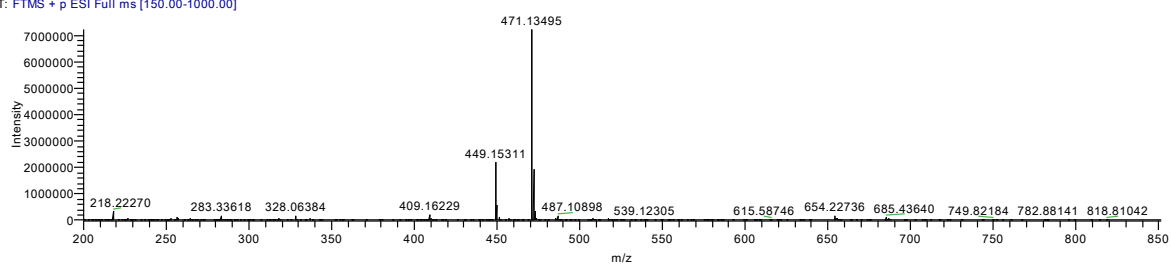

17mdv196-YZ354C #14 RT: 0.23082 AV: 1 NL: 7.19E6  
T: FTMS + p ESI Full ms [150.00-1000.00]

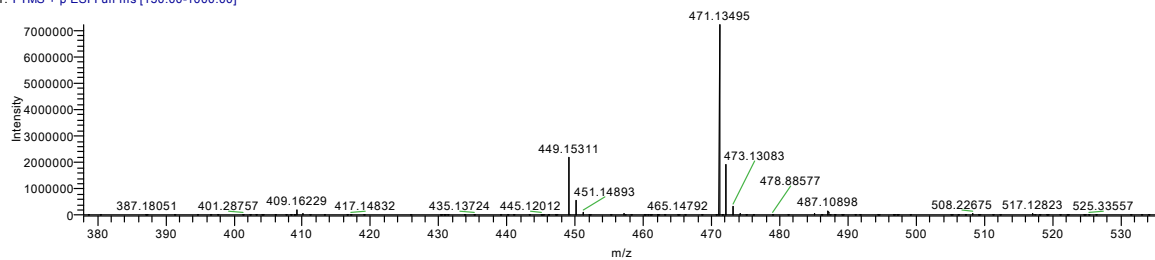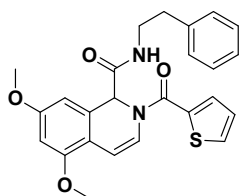

**Chemical Formula:** C<sub>25</sub>H<sub>24</sub>N<sub>2</sub>O<sub>4</sub>S

**Exact Mass:** 448.1457

**Molecular Weight:** 448.5370

**6g: 2-(5-bromofuran-2-carbonyl)-5,7-dimethoxy-N-phenethyl-1,2-dihydroisoquinoline-1-carboxamide**

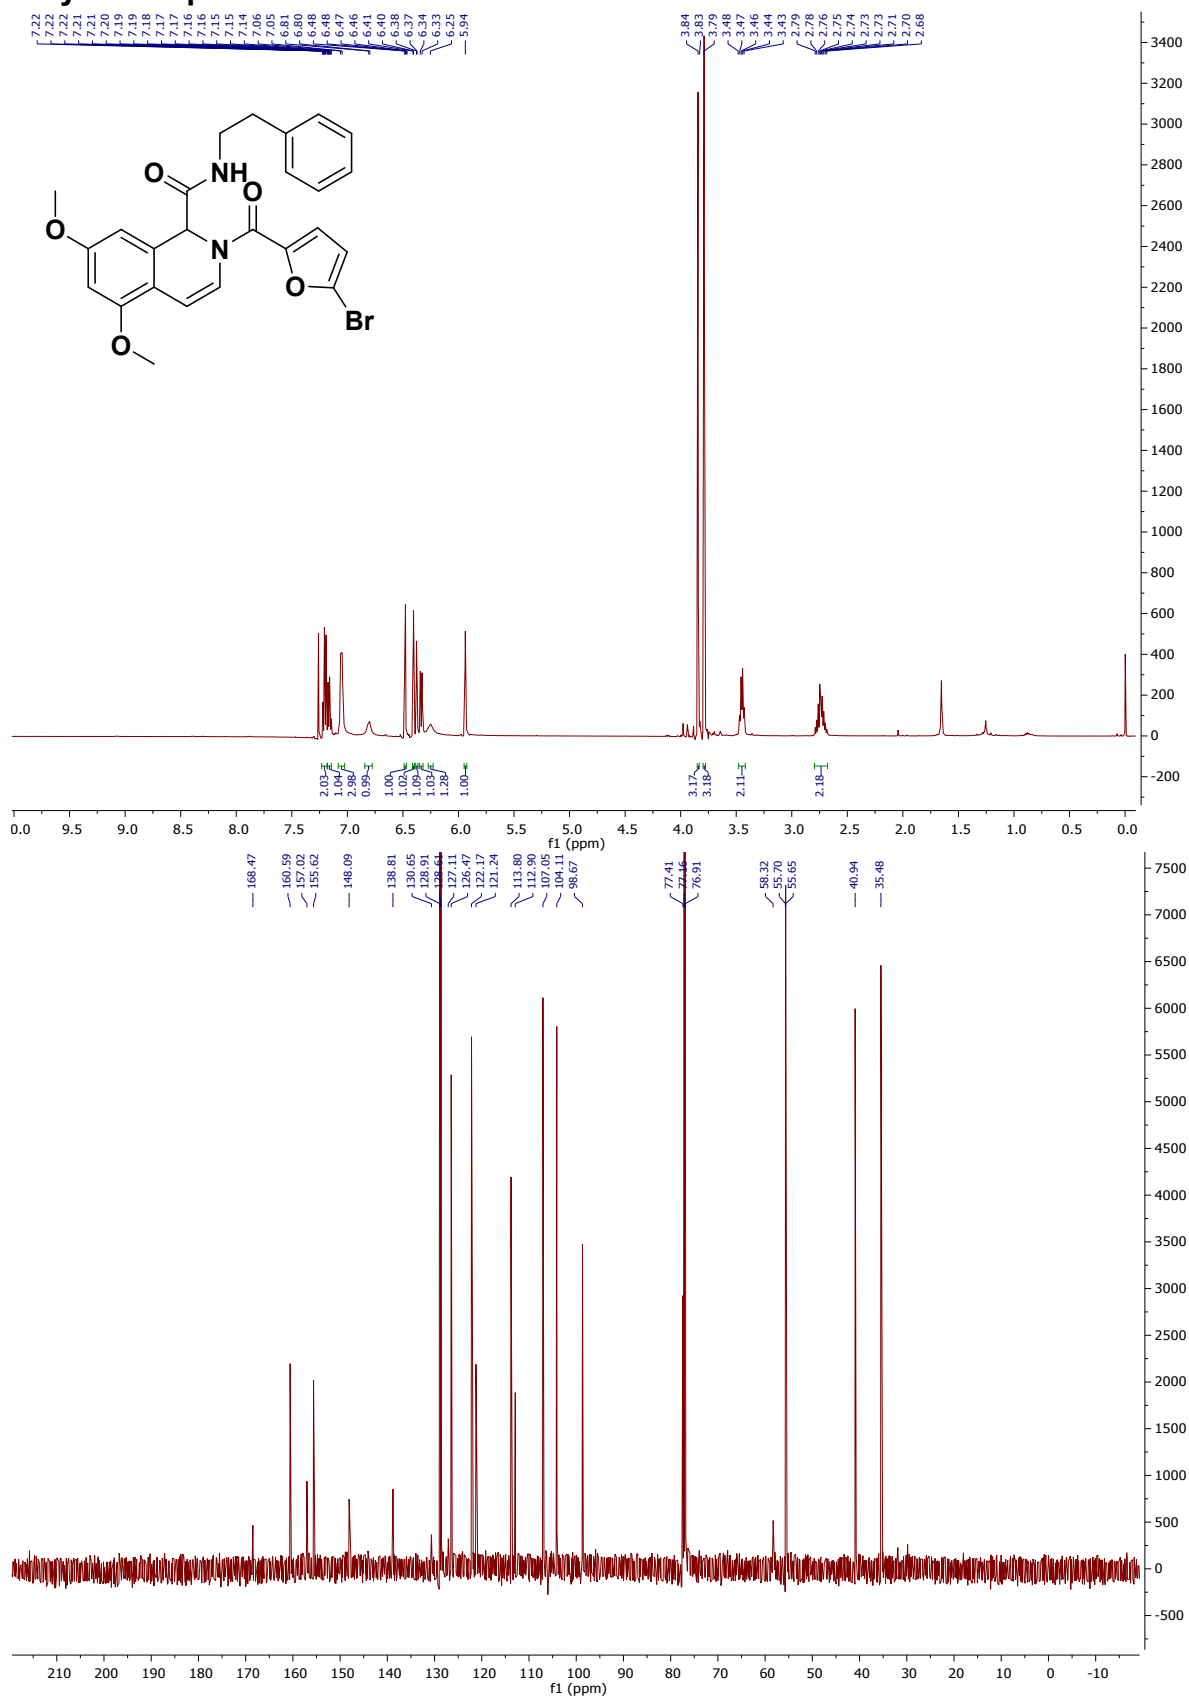

17mdv196-YZ356C #18-24 RT: 0.30472-0.42170 AV: 7 NL: 5.83E5  
T: FTMS + p ESI Full ms [150.00-1000.00]

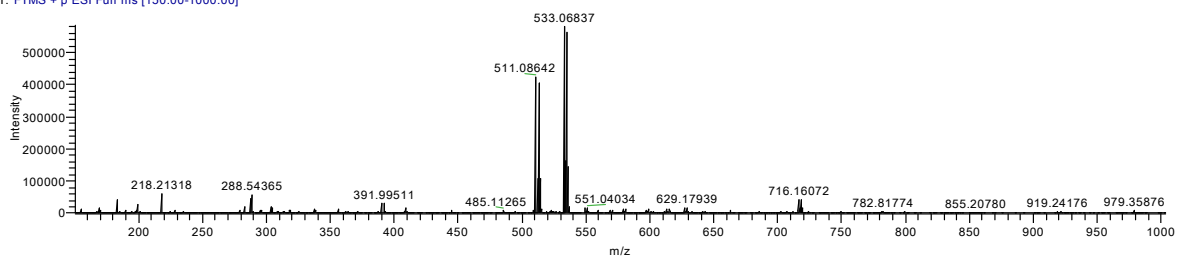

17mdv196-YZ356C #18-24 RT: 0.30472-0.42170 AV: 7 NL: 5.83E5  
T: FTMS + p ESI Full ms [150.00-1000.00]

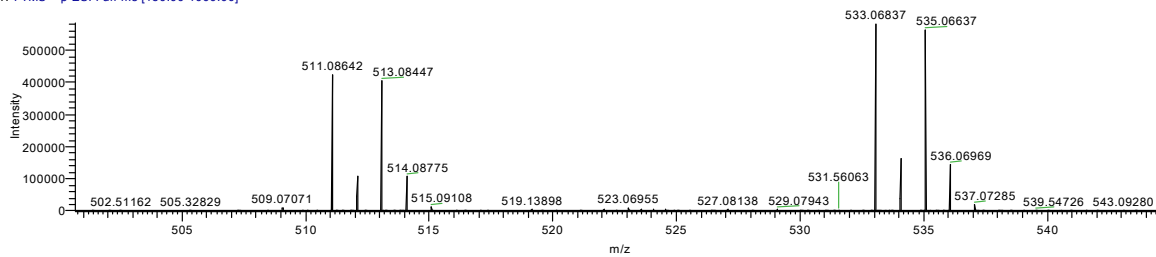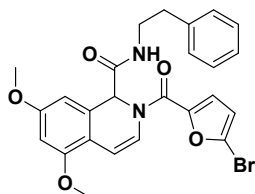

**Chemical Formula:** C<sub>25</sub>H<sub>23</sub>BrN<sub>2</sub>O<sub>5</sub>  
**Exact Mass:** 510.0790  
**Molecular Weight:** 511.3720

# 6h: N-benzyl-2-(cyclohexanecarbonyl)-5,6,7-trimethoxy-1,2-dihydroisoquinoline-1-carboxamide

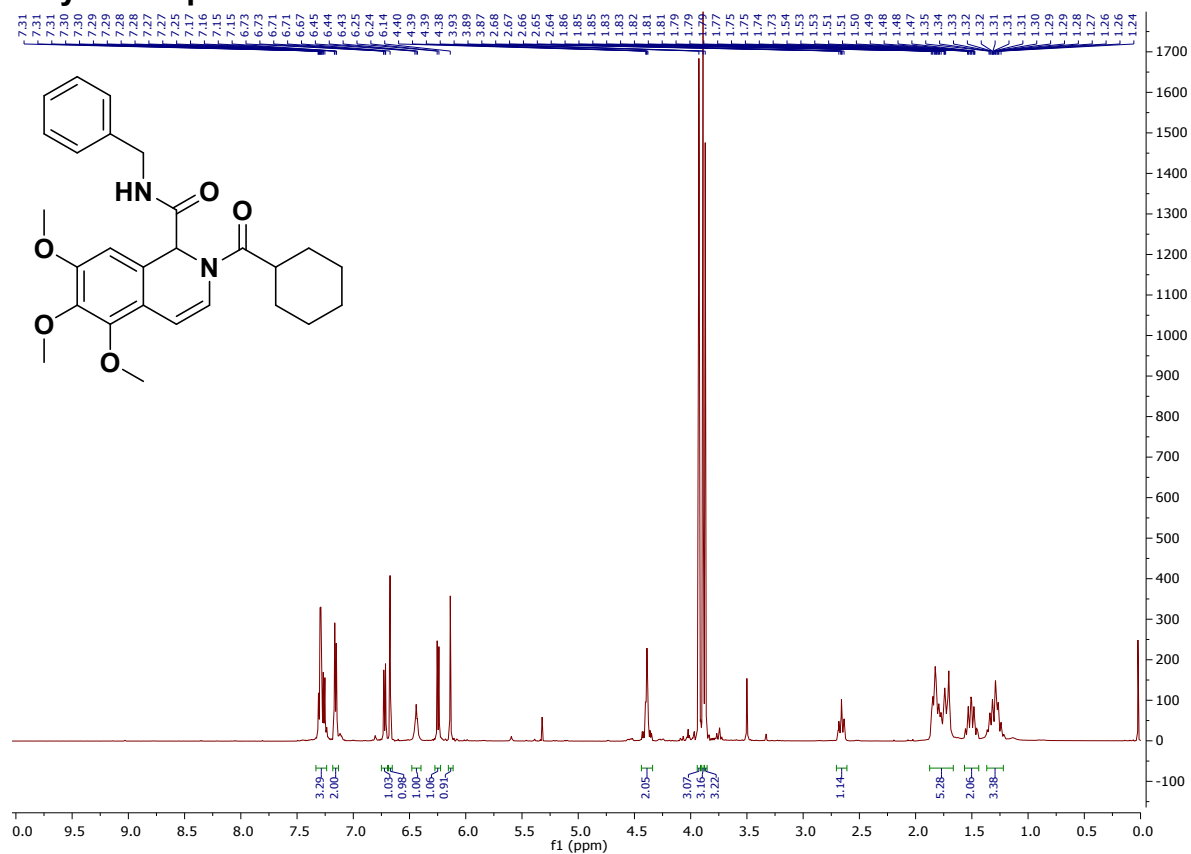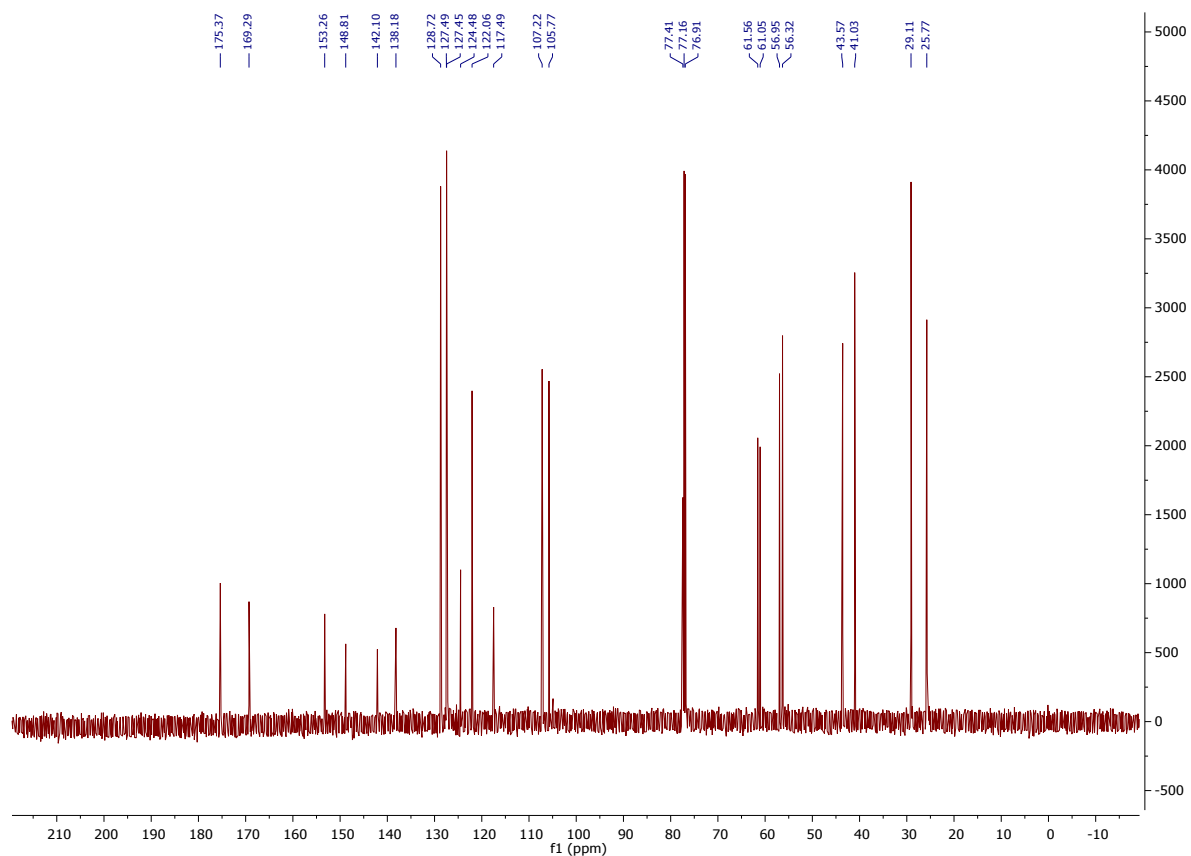

17mdv196-YZ325C #14 RT: 0.23307 AV: 1 NL: 7.22E6  
T: FTMS + p ESI Full ms [150.00-1000.00]

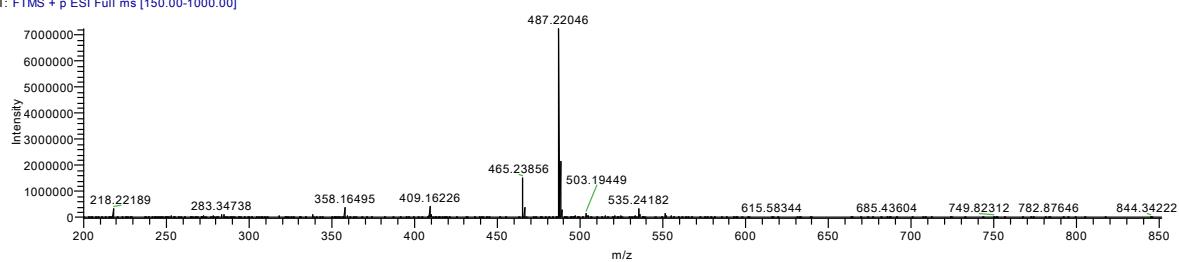

17mdv196-YZ325C #14 RT: 0.23307 AV: 1 NL: 7.22E6  
T: FTMS + p ESI Full ms [150.00-1000.00]

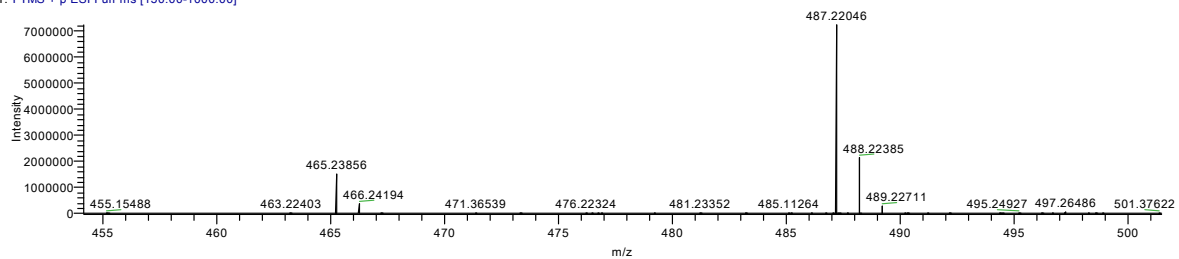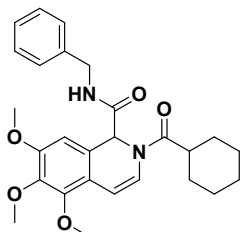

**Chemical Formula:**  $C_{27}H_{32}N_2O_5$   
**Exact Mass:** 464.2311  
**Molecular Weight:** 464.5620

**6i: N-benzyl-2-(3-bromopropanoyl)-5,6,7-trimethoxy-1,2-dihydroisoquinoline-1-carboxamide**

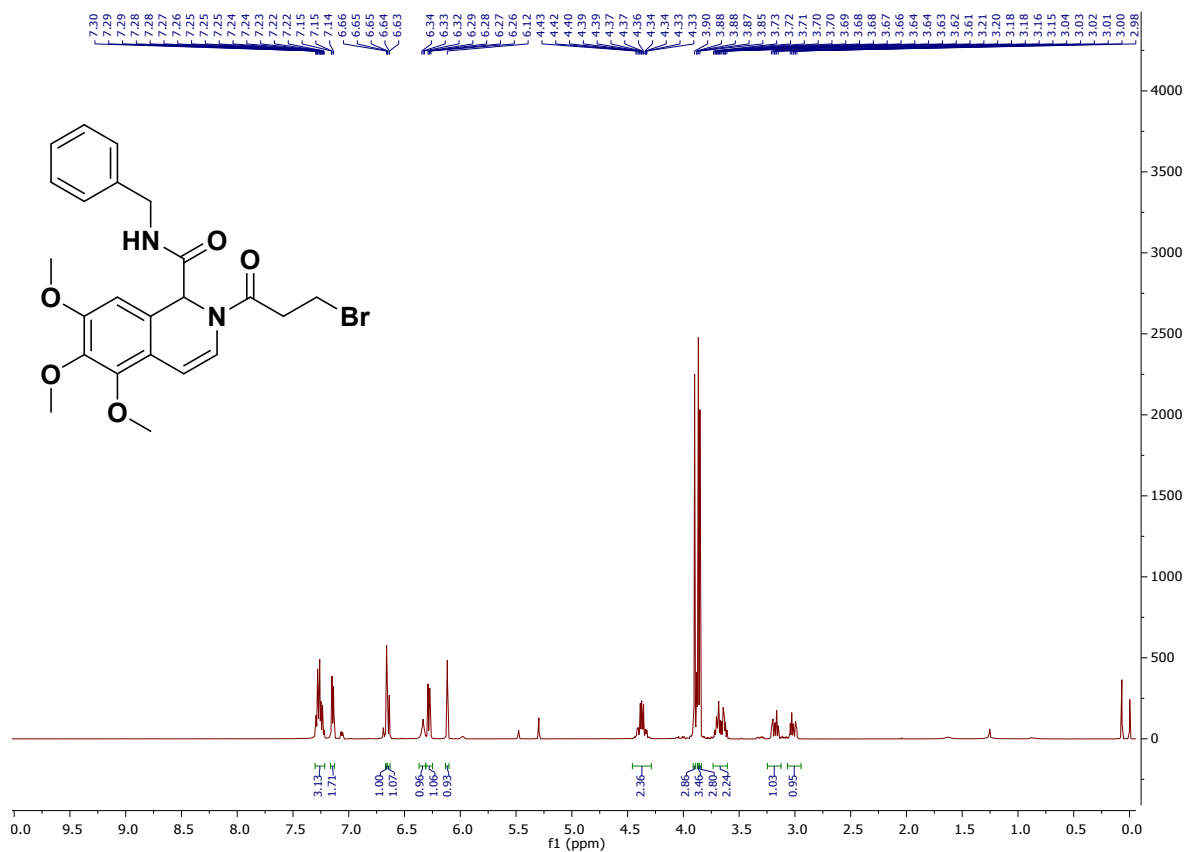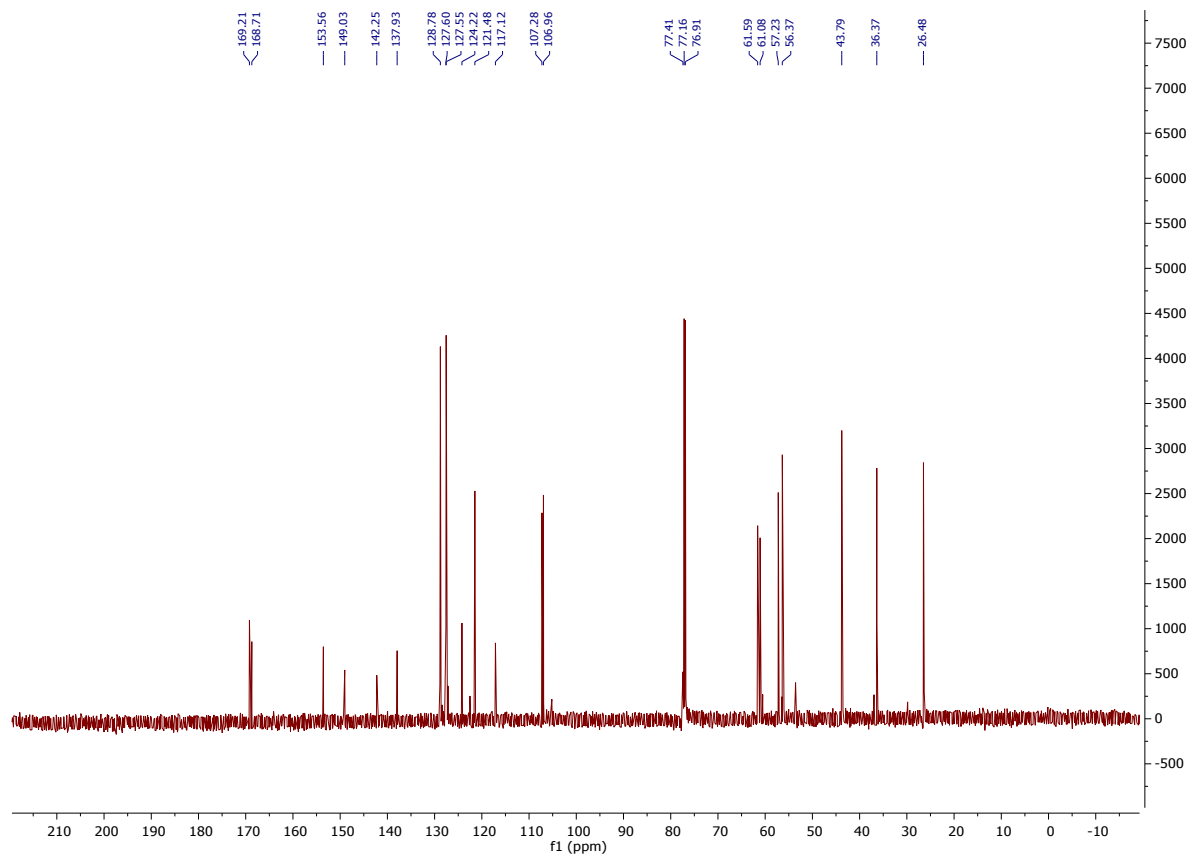



17mdv196-YZ317C #14 RT: 0.23801 AV: 1 NL: 6.49E6  
T: FTMS + p ESI Full ms [150.00-1000.00]

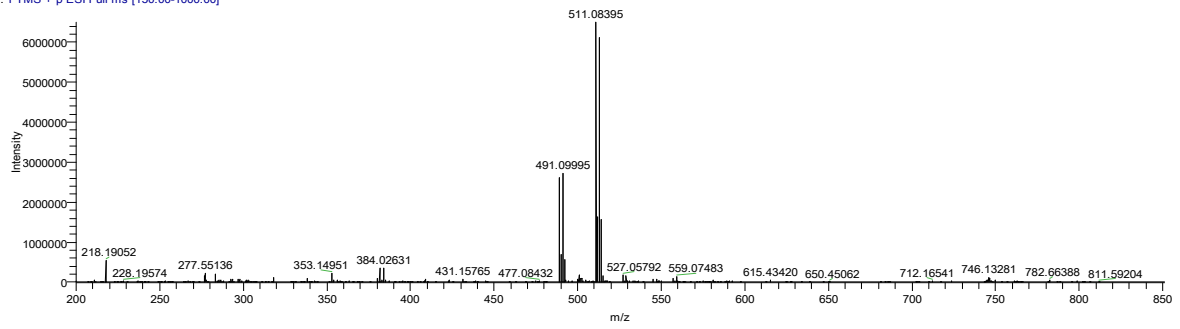

17mdv196-YZ317C #14 RT: 0.23801 AV: 1 NL: 6.49E6  
T: FTMS + p ESI Full ms [150.00-1000.00]

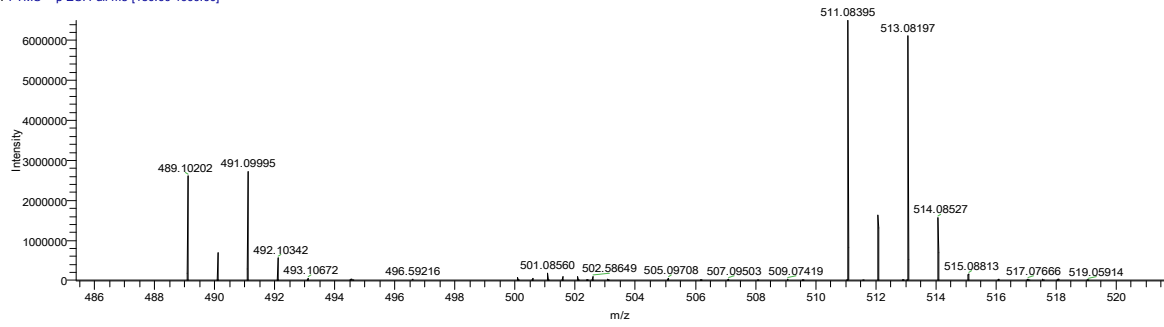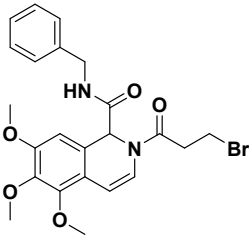

**Chemical Formula:**  $C_{23}H_{25}BrN_2O_5$   
**Exact Mass:** 488.0947  
**Molecular Weight:** 489.3660

**6j: 2-acetyl-5,6,7-trimethoxy-N-phenethyl-1,2-dihydroisoquinoline-1-carboxamide**

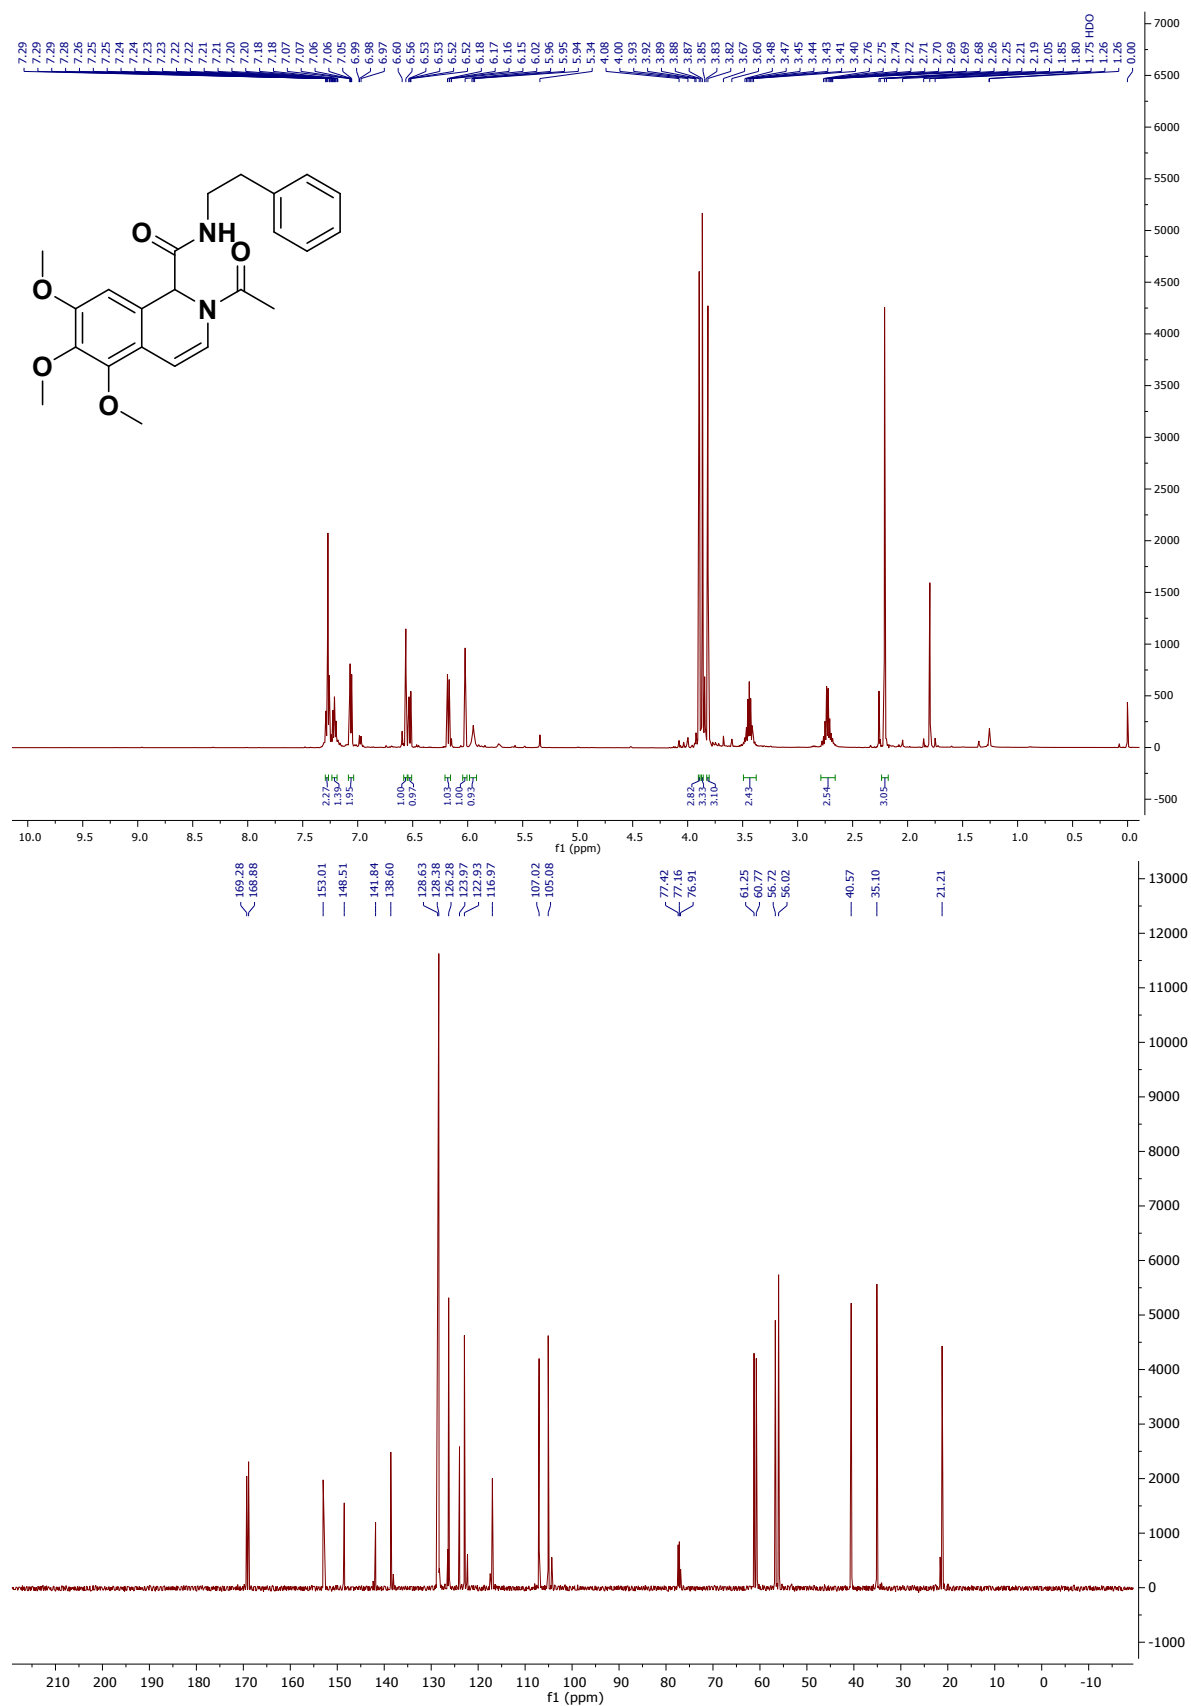

18mdv071-PHP752 #12 RT: 0.21427 AV: 1 NL: 1.01E6  
T: FTMS + p ESI Full ms [220.00-1000.00]

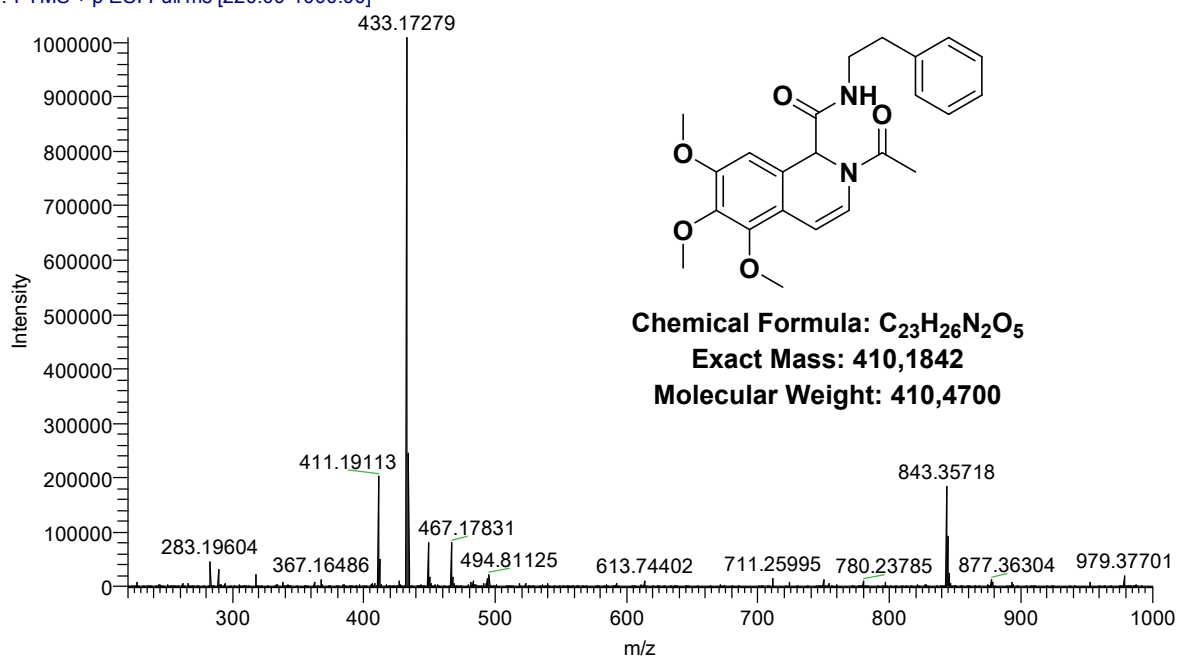

**8a: N-(6,7,8-trimethoxy-2-oxo-3-phenethyl-2,3-dihydro-1H-benzo[d]azepin-1-yl)pivalamide**

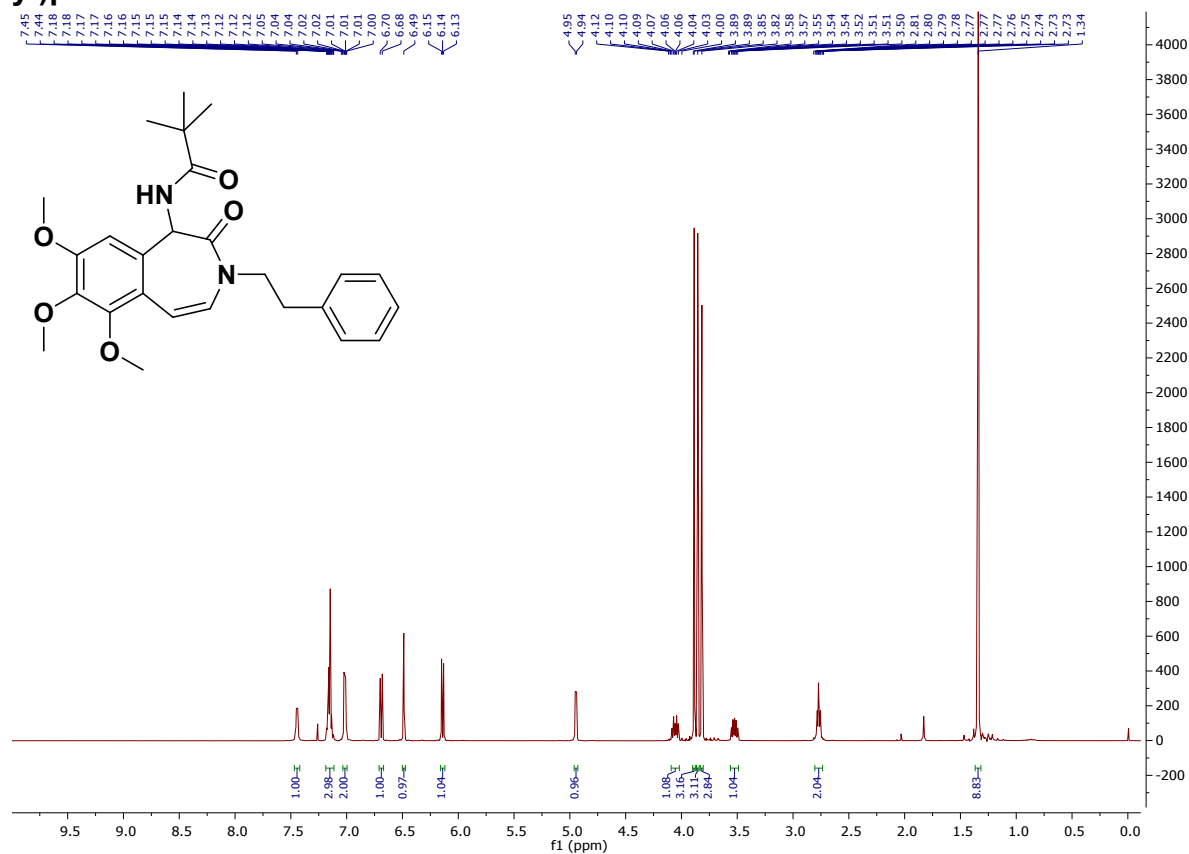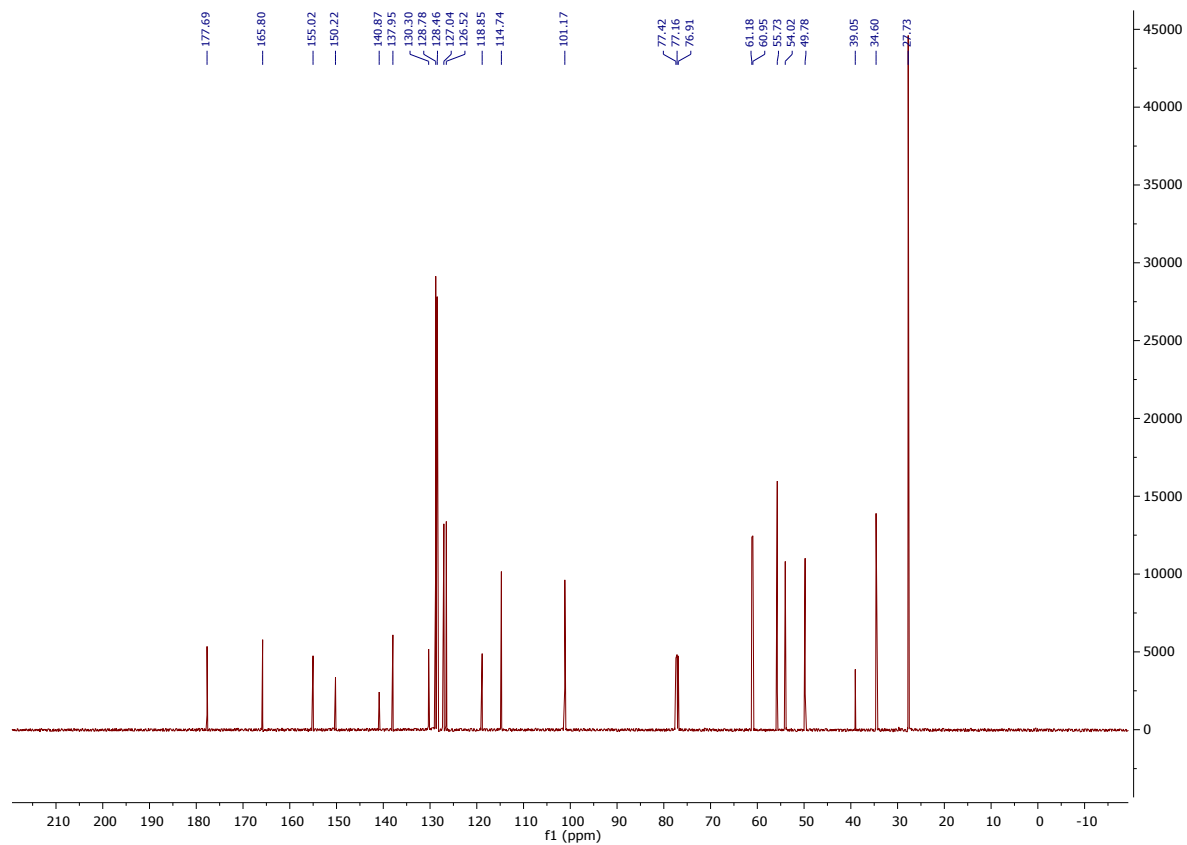

17mdv196-YZ406C #14 RT: 0.23672 AV: 1 NL: 2.81E7  
T: FTMS + p ESI Full ms [150.00-1000.00]

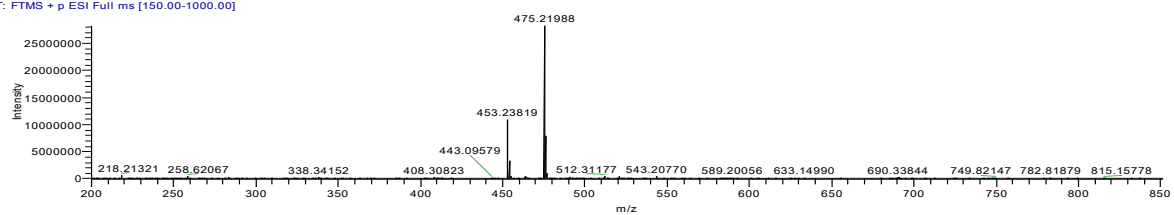

17mdv196-YZ406C #14 RT: 0.23672 AV: 1 NL: 2.81E7  
T: FTMS + p ESI Full ms [150.00-1000.00]

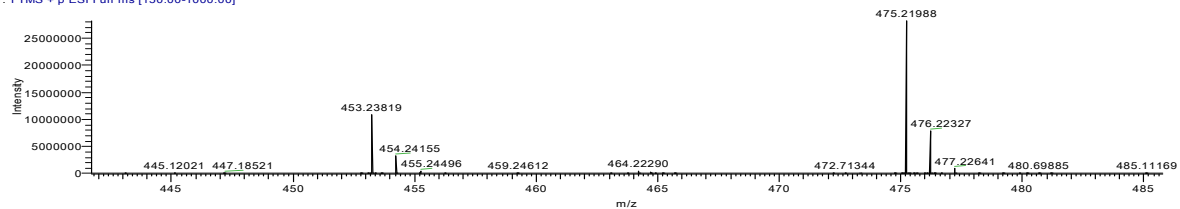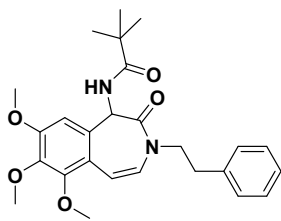

Chemical Formula:  $C_{26}H_{32}N_2O_5$

Exact Mass: 452.2311

Molecular Weight: 452.5510

**8b: *N*-(7,8-dimethoxy-2-oxo-3-phenethyl-2,3-dihydro-1*H*-benzo[*d*]azepin-1-yl) pivalamide**

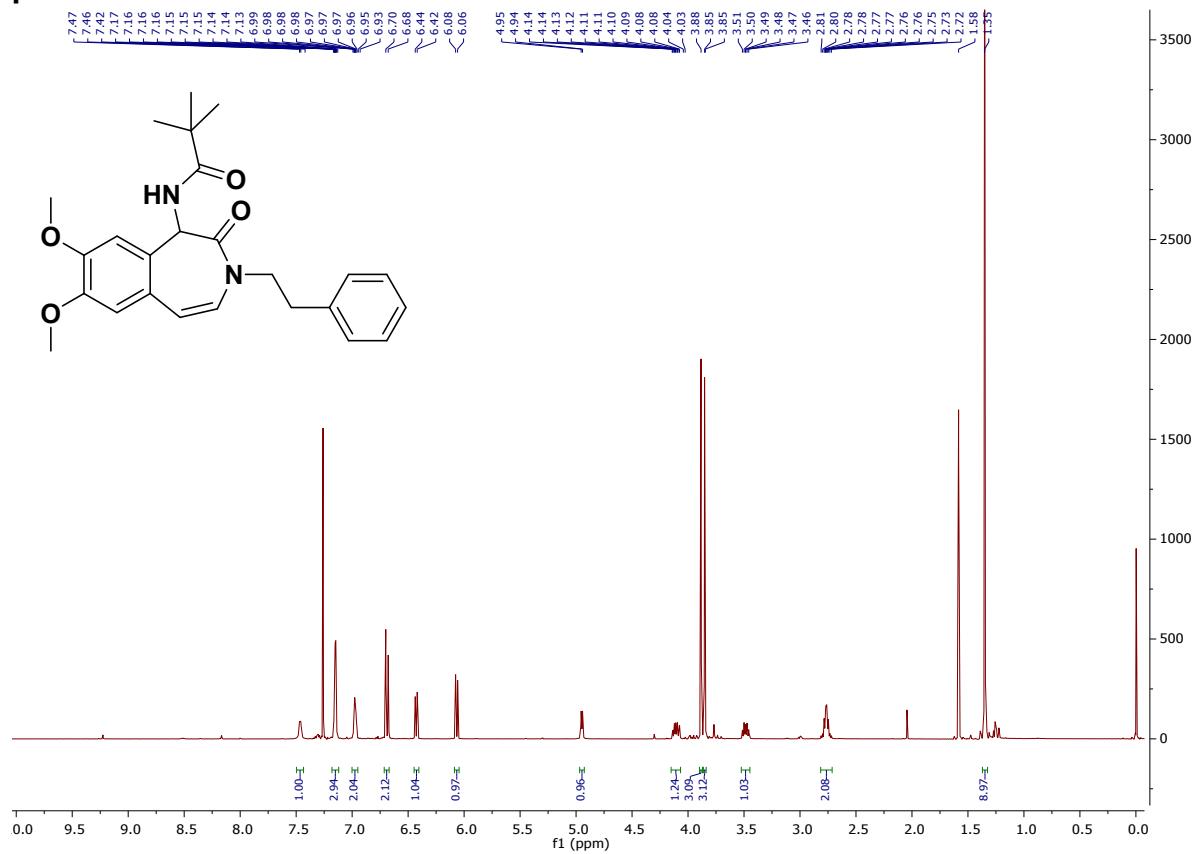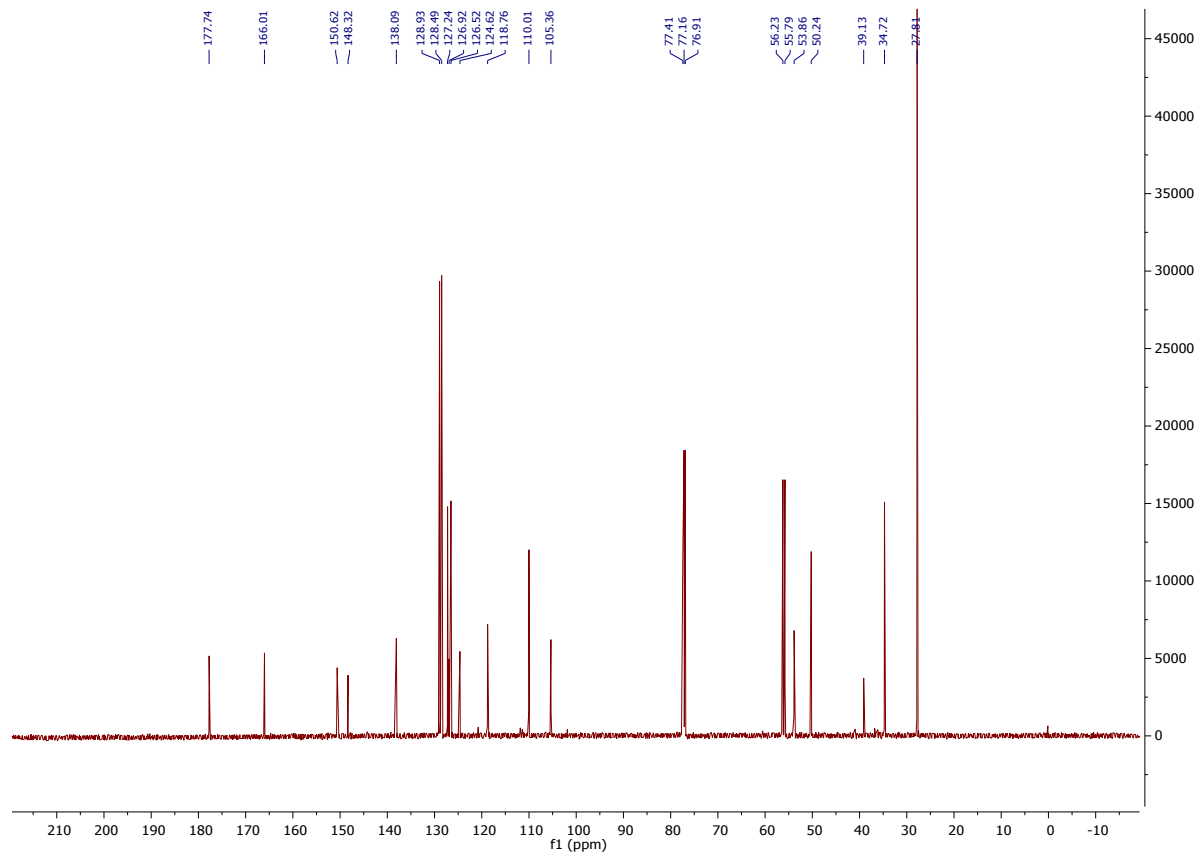

17mdv196-YZ411C #18-24 RT: 0.30587-0.41074 AV: 7 NL: 3.24E6  
T: FTMS + p ESI Full ms [150.00-1000.00]

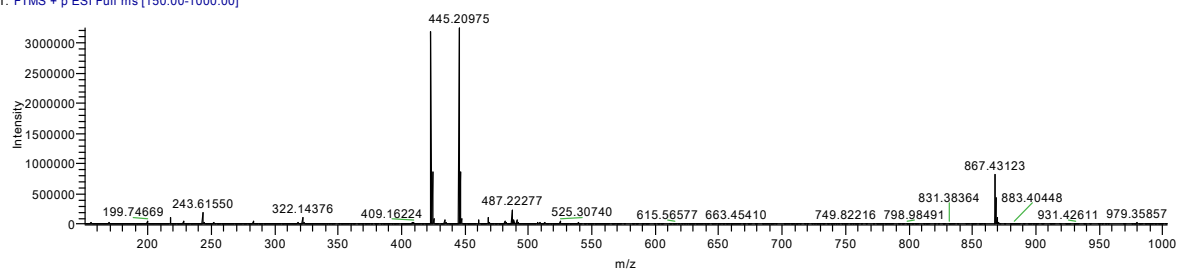

17mdv196-YZ411C #18-24 RT: 0.30587-0.41074 AV: 7 NL: 3.24E6  
T: FTMS + p ESI Full ms [150.00-1000.00]

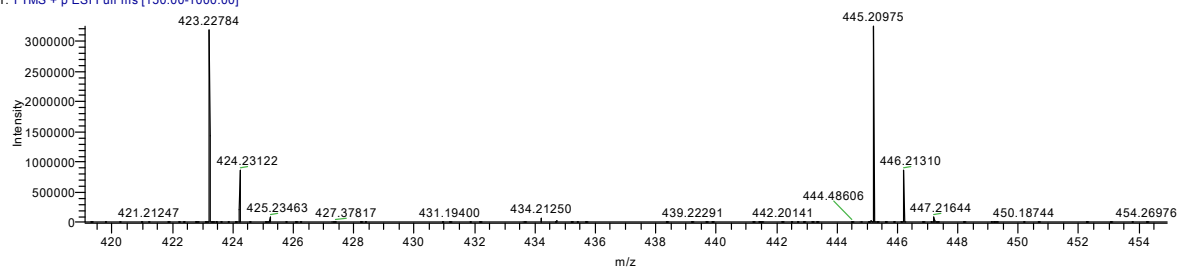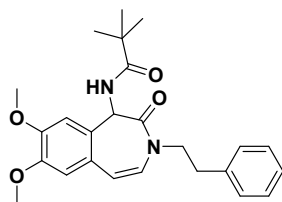

Chemical Formula:  $C_{25}H_{30}N_2O_4$

Exact Mass: 422.2206

Molecular Weight: 422.5250

**8c: N-(6,8-dimethoxy-2-oxo-3-phenethyl-2,3-dihydro-1H-benzo[d]azepin-1-yl)pivalamide**

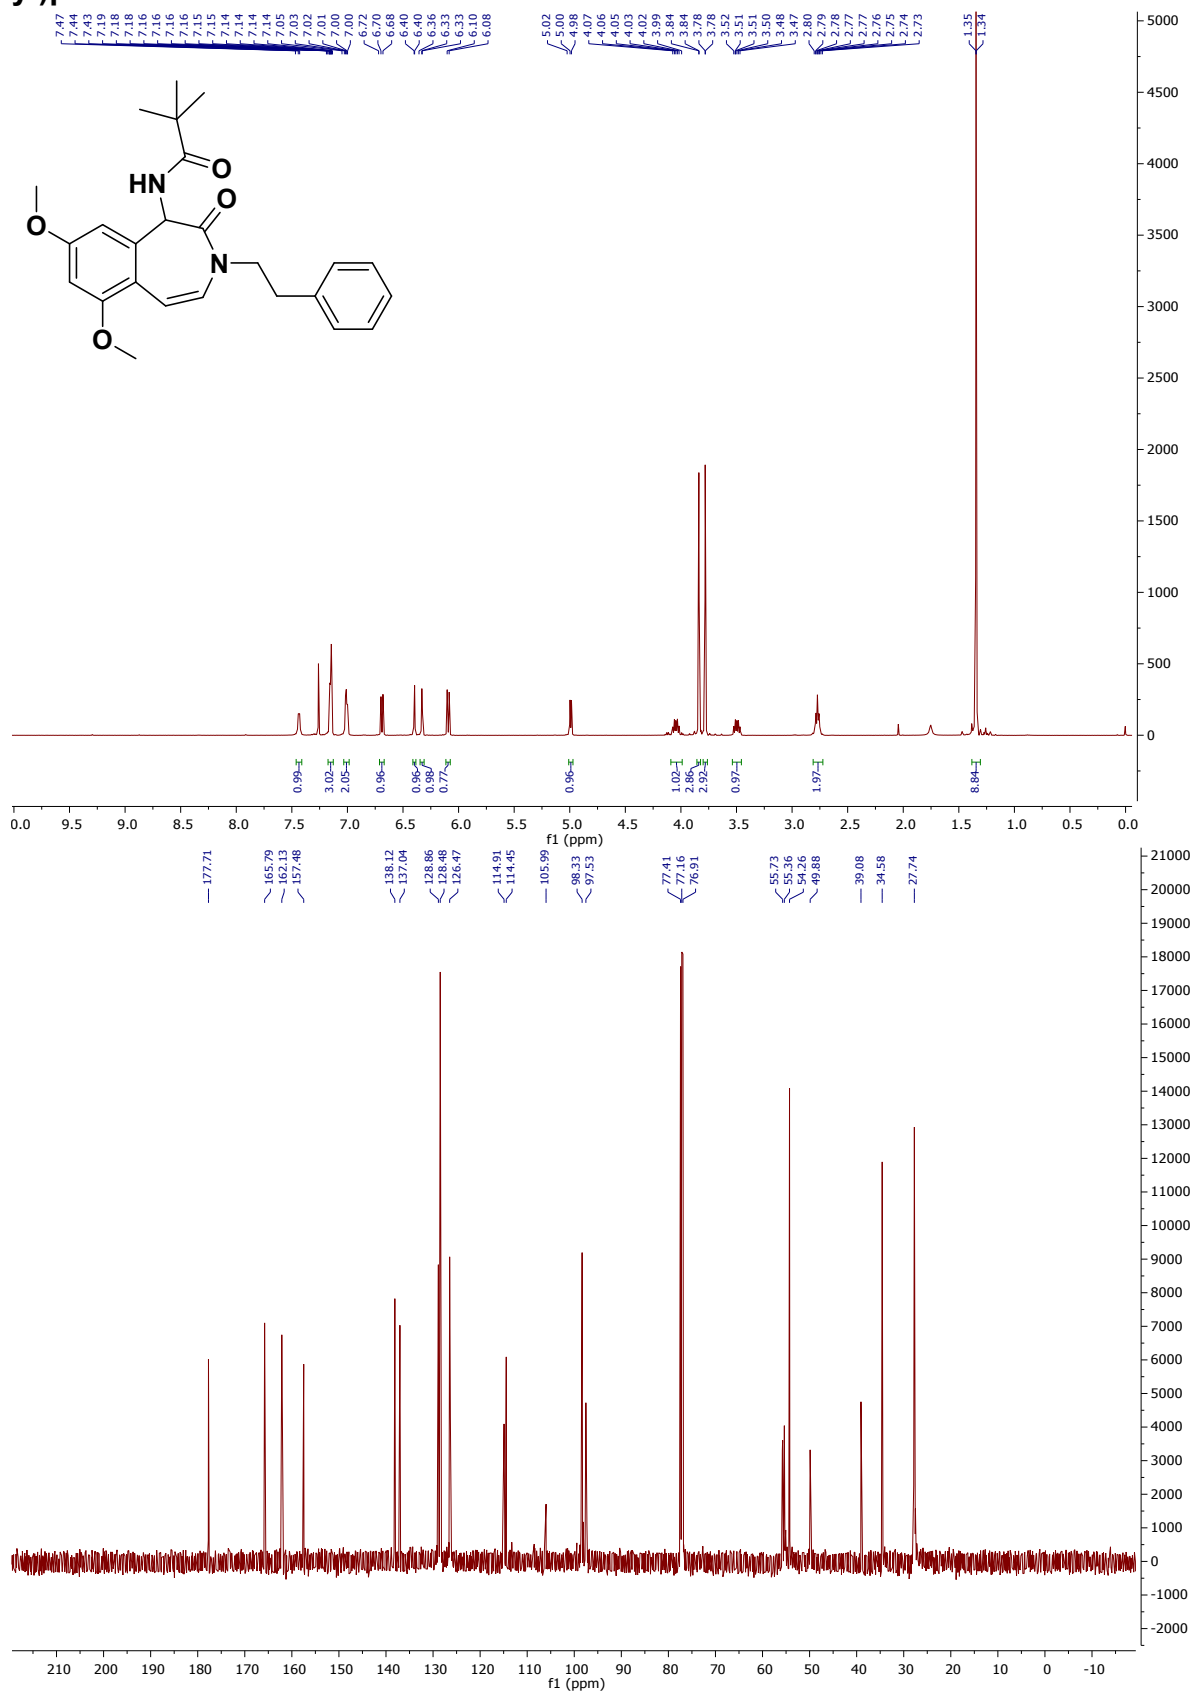



18mdv071-yz413C #12 RT: 0.20986 AV: 1 NL: 8.05E5  
T: FTMS + p ESI Full ms [220.00-1000.00]

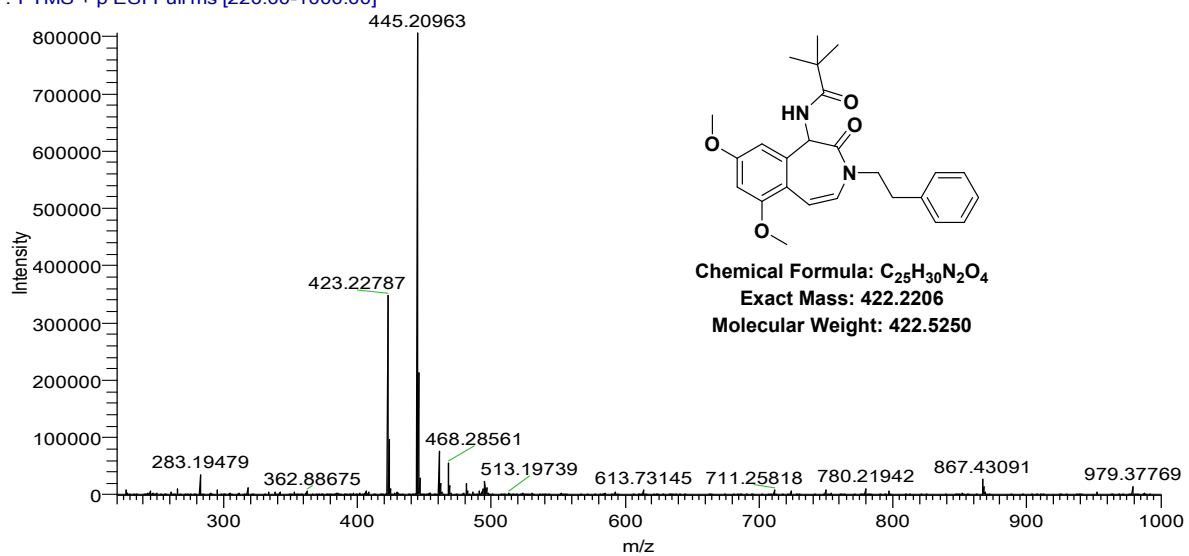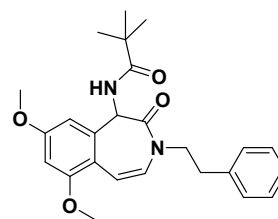

**Chemical Formula:** C<sub>25</sub>H<sub>30</sub>N<sub>2</sub>O<sub>4</sub>  
**Exact Mass:** 422.2206  
**Molecular Weight:** 422.5250

**8d: N-(6-oxo-7-phenethyl-6,7-dihydro-5H-[1,3]dioxolo[4',5':4,5]benzo[1,2-d]azepin-5-yl)pivalamide**

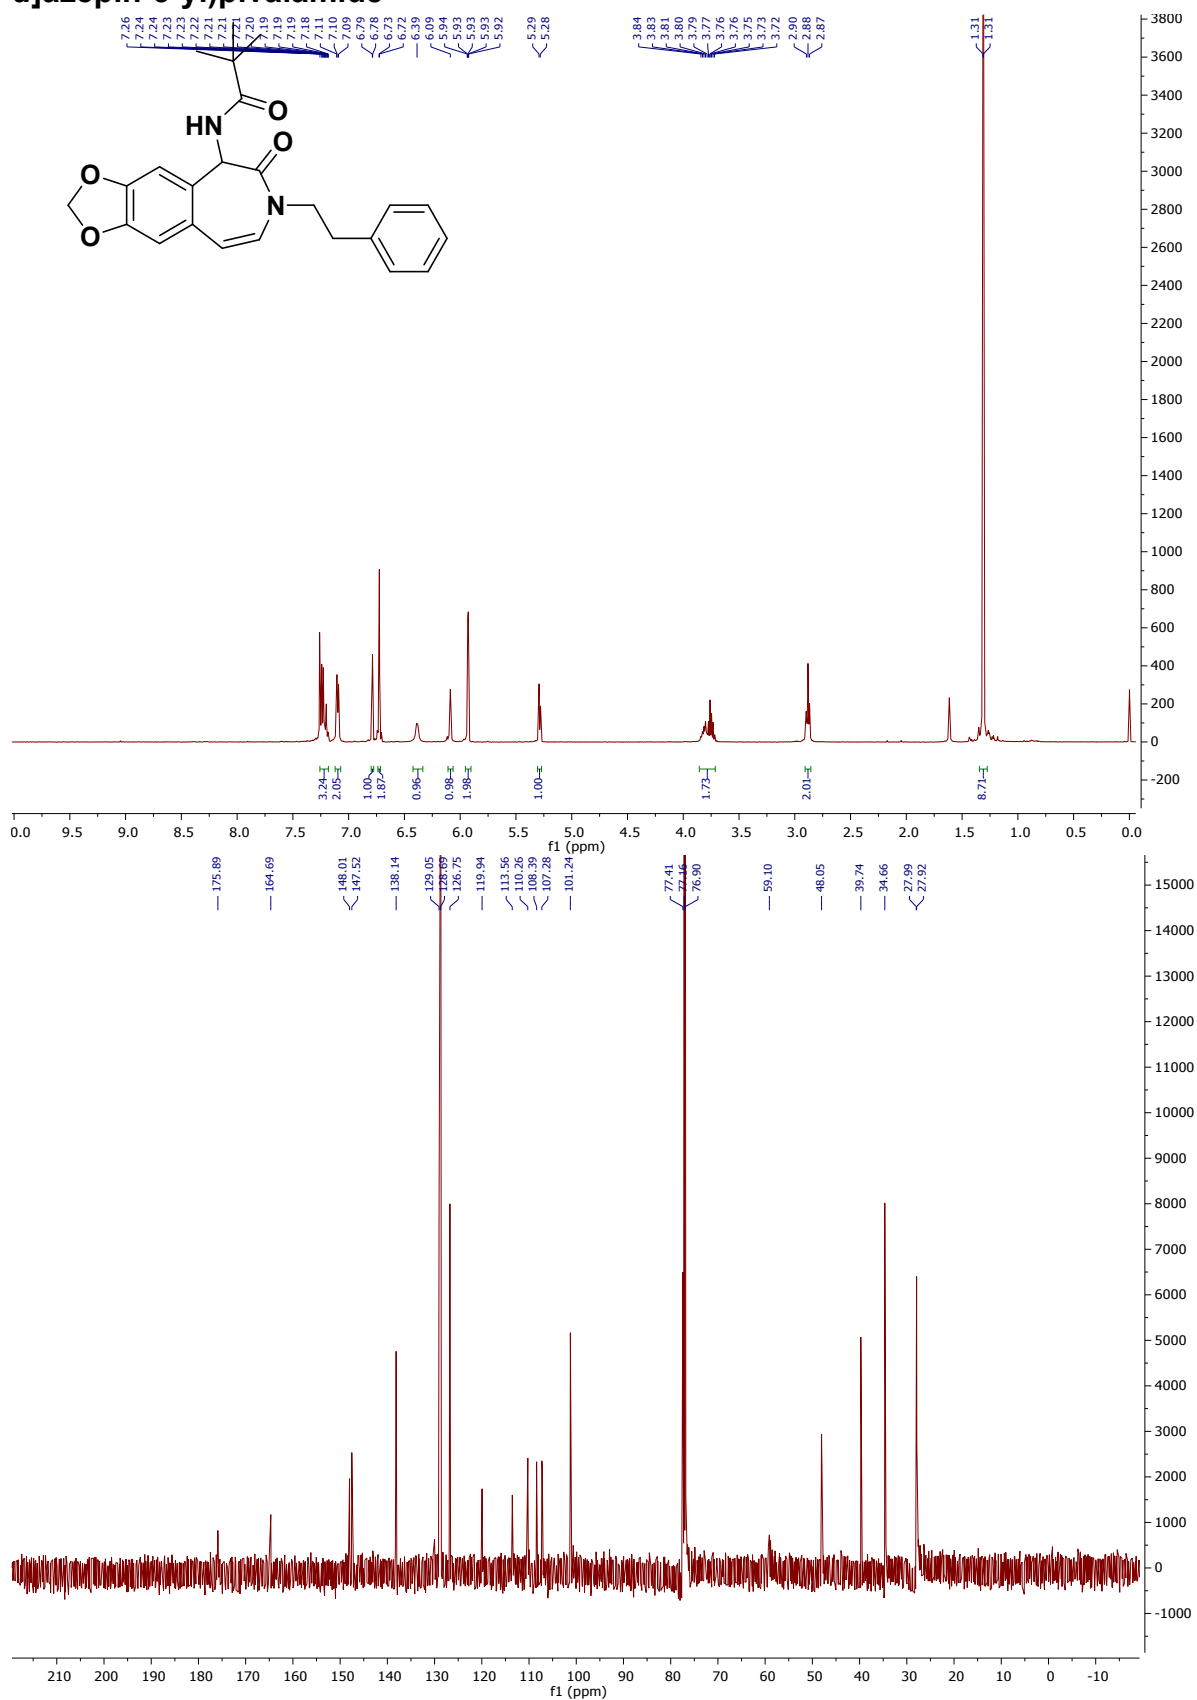

MSC-18MDV093-YZ464C #1428 RT: 6.36 AV: 1 NL: 3.43E8  
T: FTMS + p ESI Full ms [150.0000-1000.0000]

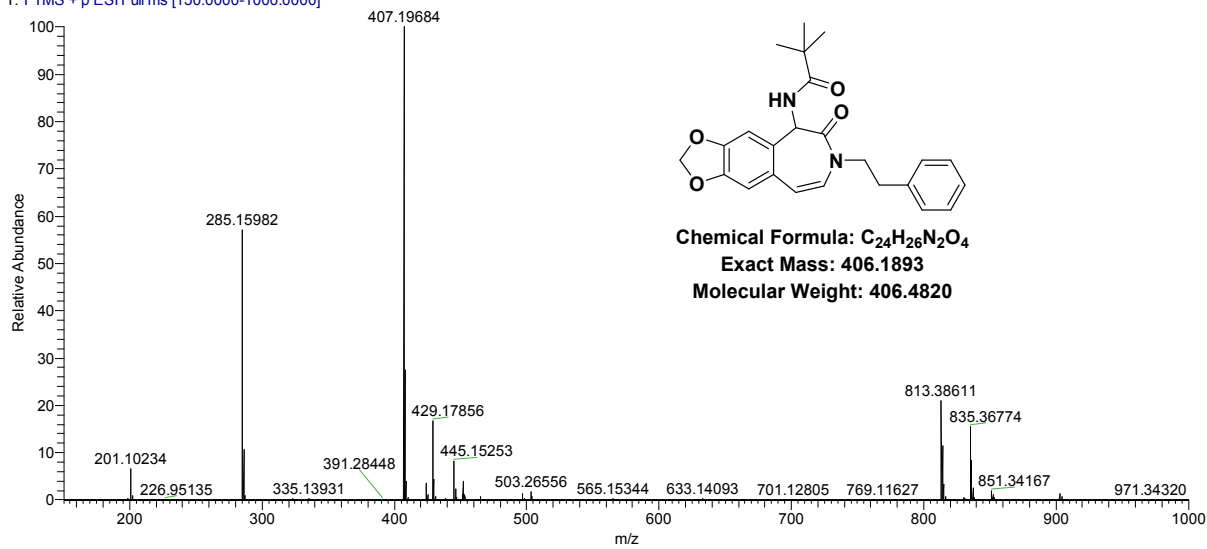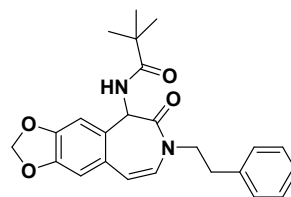

Chemical Formula:  $C_{24}H_{26}N_2O_4$   
Exact Mass: 406.1893  
Molecular Weight: 406.4820

**8e: N-(3-benzyl-6,8-dimethoxy-2-oxo-2,3-dihydro-1H-benzo[d]azepin-1-yl)pivalamide**

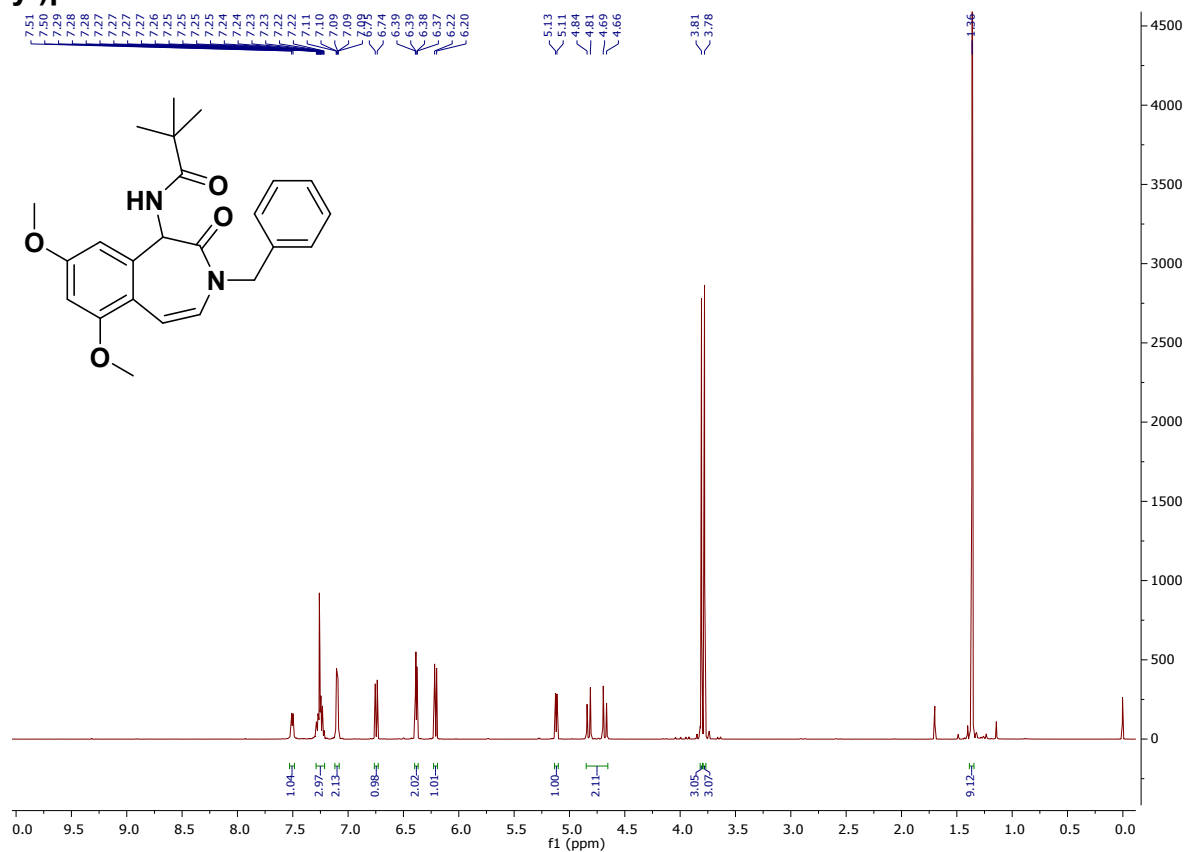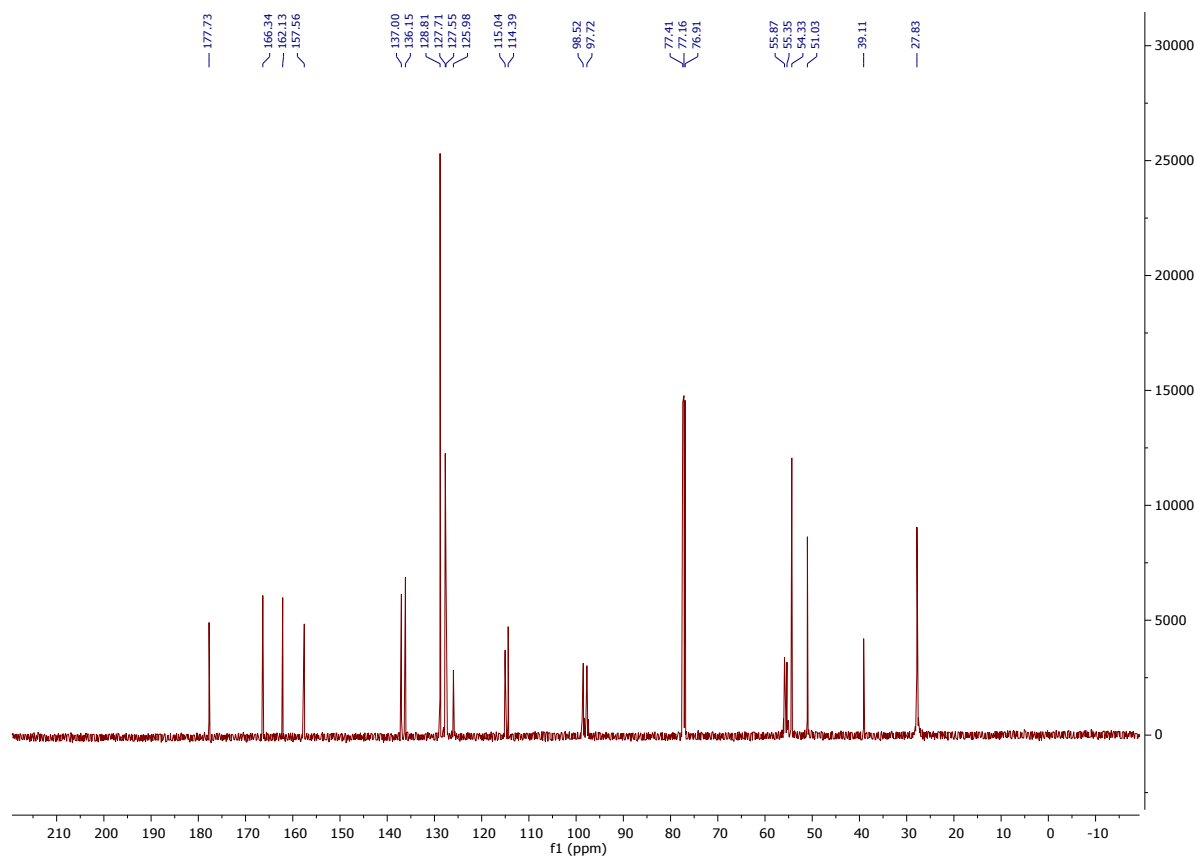

18mdv071-YZ465C #6 RT: 0.10325 AV: 1 NL: 2.59E7  
T: FTMS + p ESI Full ms [220.00-1000.00]

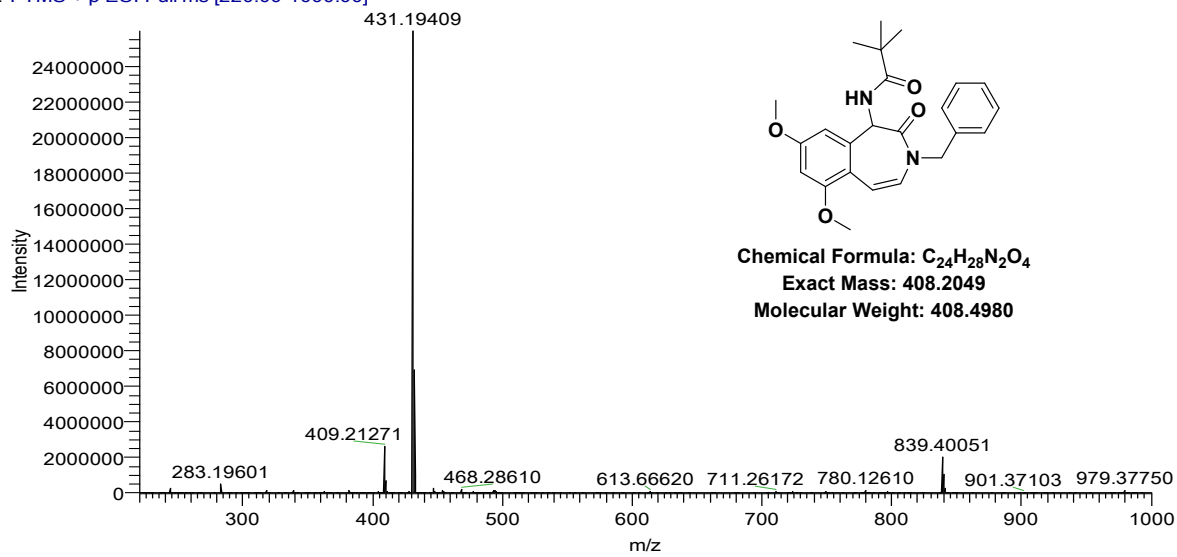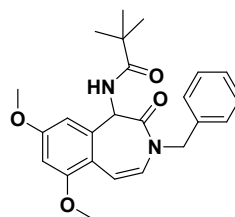

**Chemical Formula:** C<sub>24</sub>H<sub>28</sub>N<sub>2</sub>O<sub>4</sub>  
**Exact Mass:** 408.2049  
**Molecular Weight:** 408.4980

# 10a: 5-methoxy-N-phenethylisoquinoline-3-carboxamide

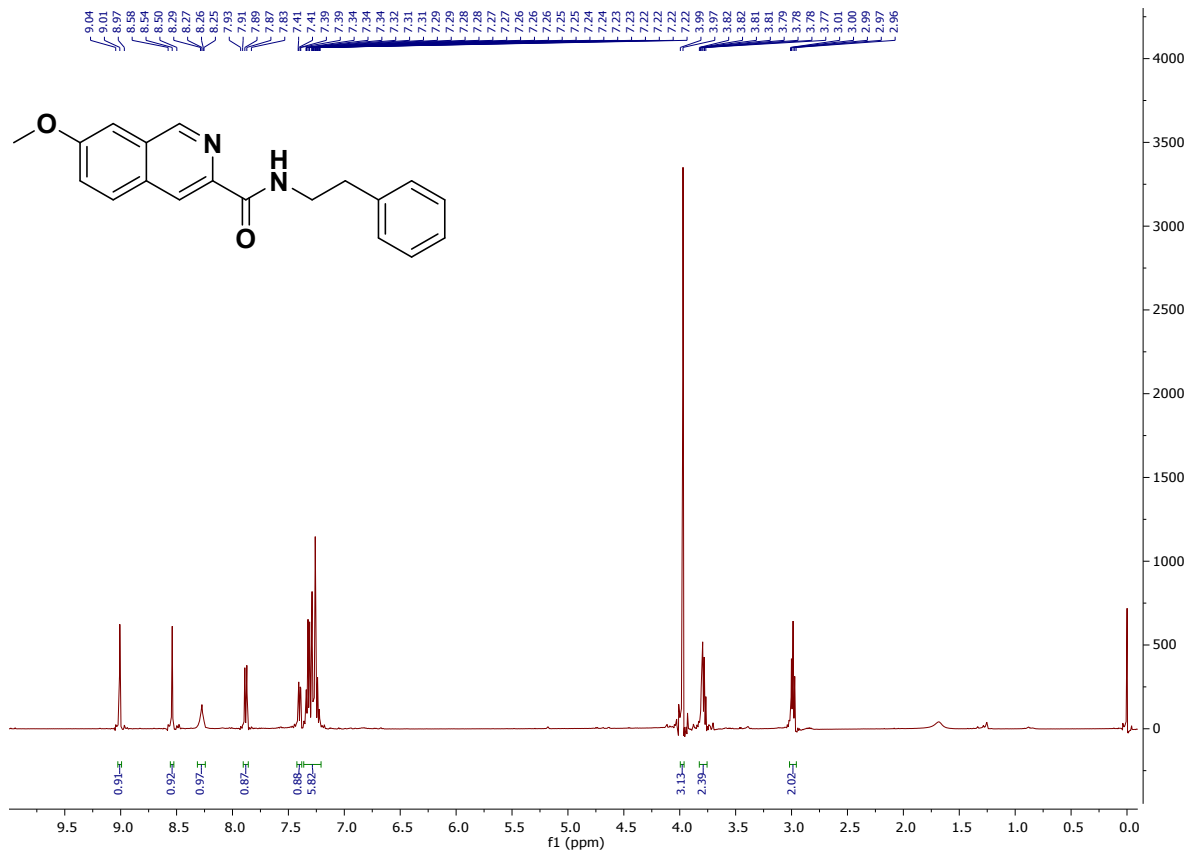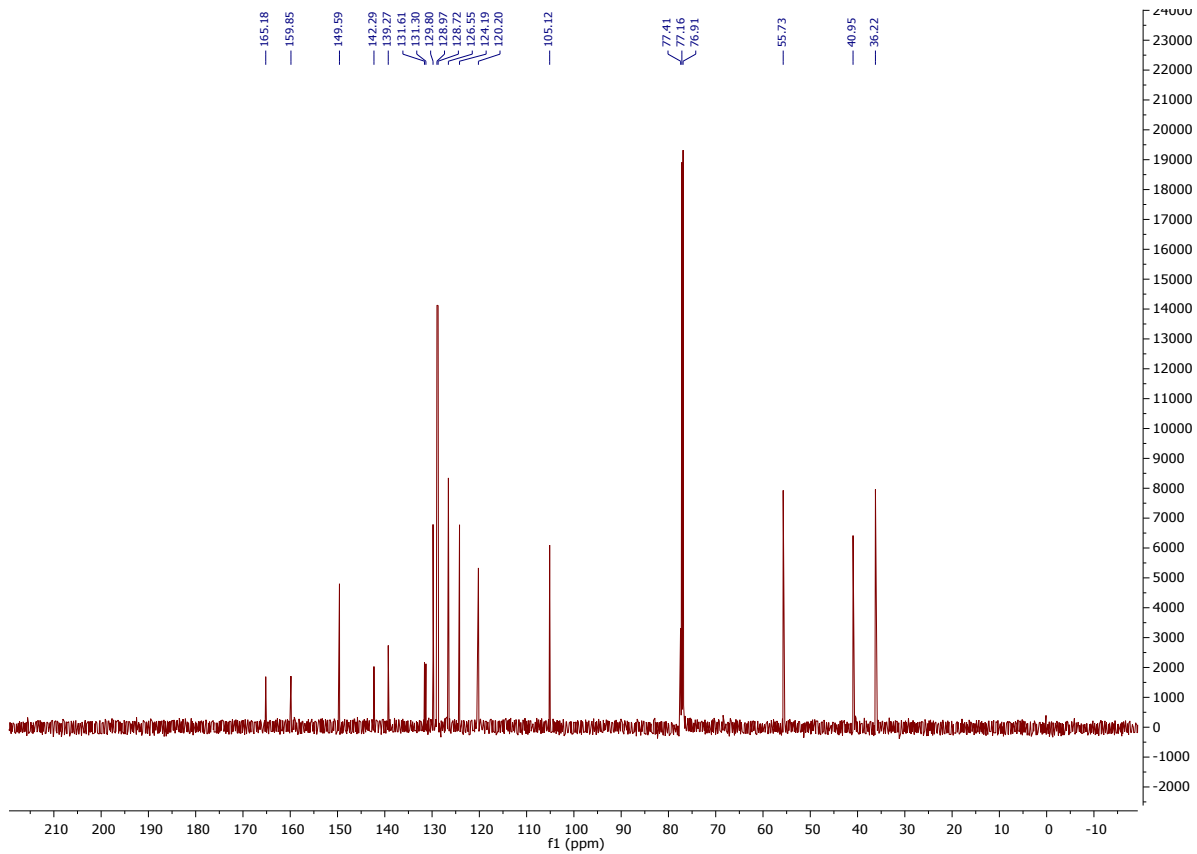

17mdv196-YZ402C #24 RT: 0.41133 AV: 1 NL: 4.56E6  
T: FTMS + p ESI Full ms [150.00-1000.00]

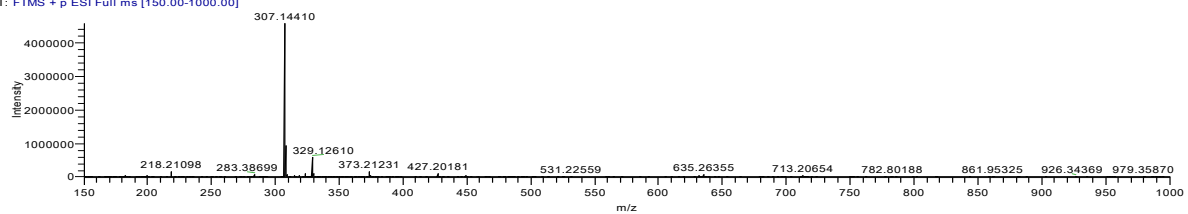

17mdv196-YZ402C #24 RT: 0.41133 AV: 1 NL: 4.56E6  
T: FTMS + p ESI Full ms [150.00-1000.00]

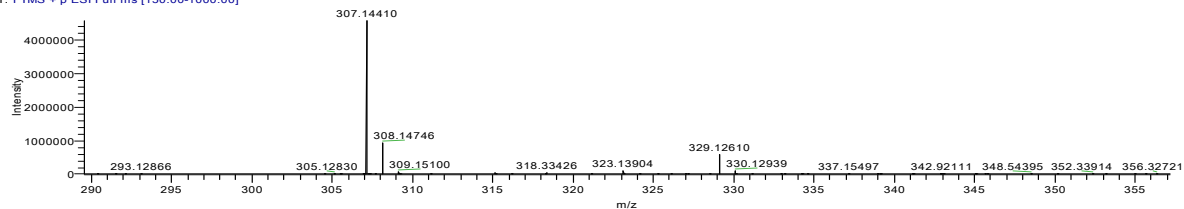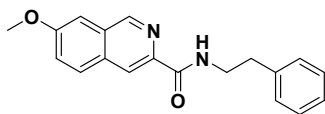

Chemical Formula:  $C_{19}H_{18}N_2O_2$

Exact Mass: 306,14

Molecular Weight: 306,37

# 10b: 6-hydroxy-7-methoxy-N-phenethylisoquinoline-3-carboxamide

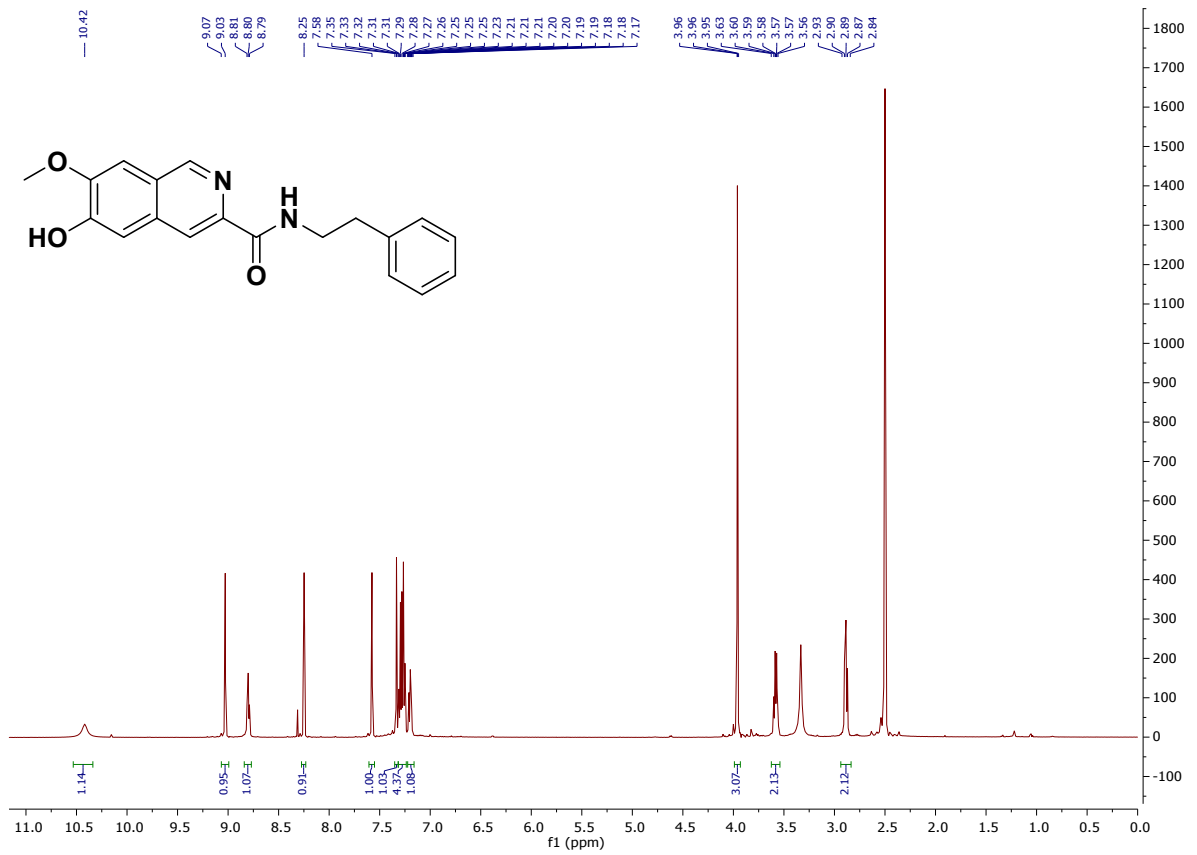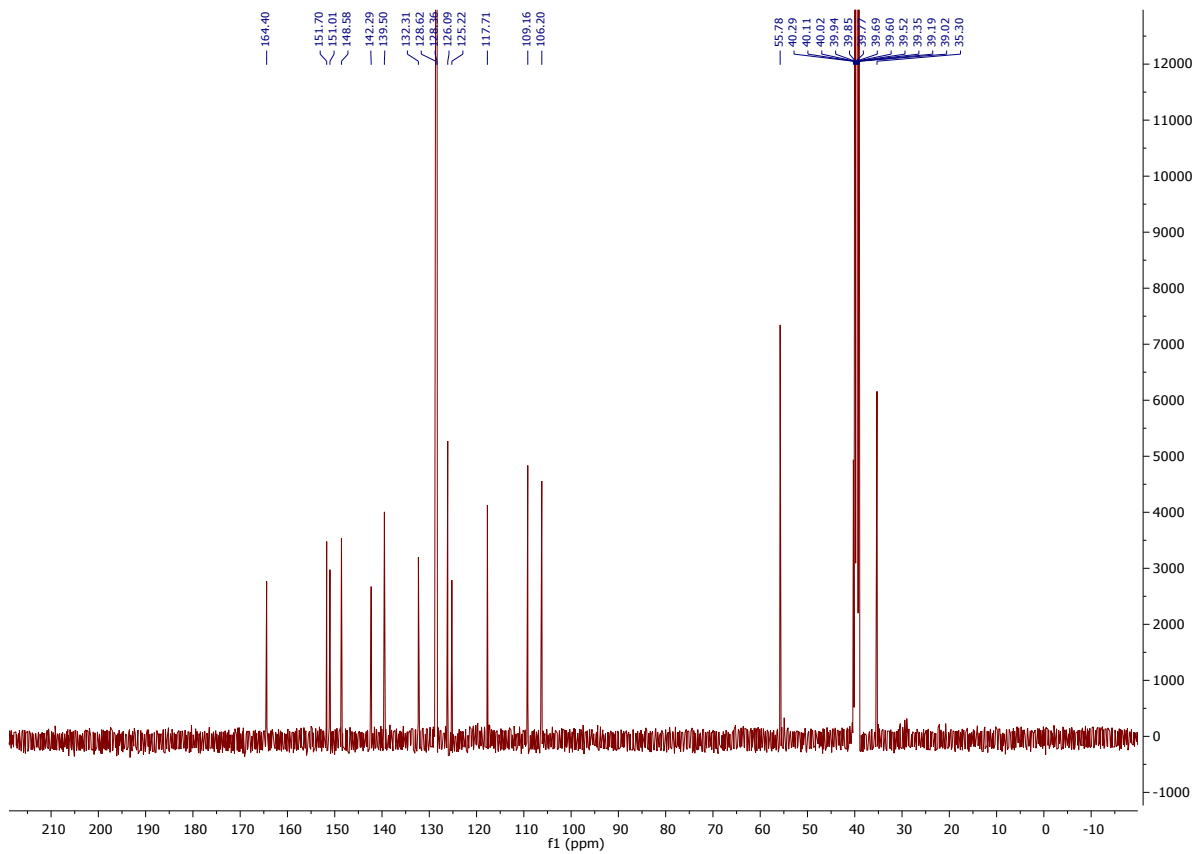



18mdv071-YZ468C #10 RT: 0.17447 AV: 1 NL: 2.55E6  
T: FTMS + p ESI Full ms [220.00-1000.00]

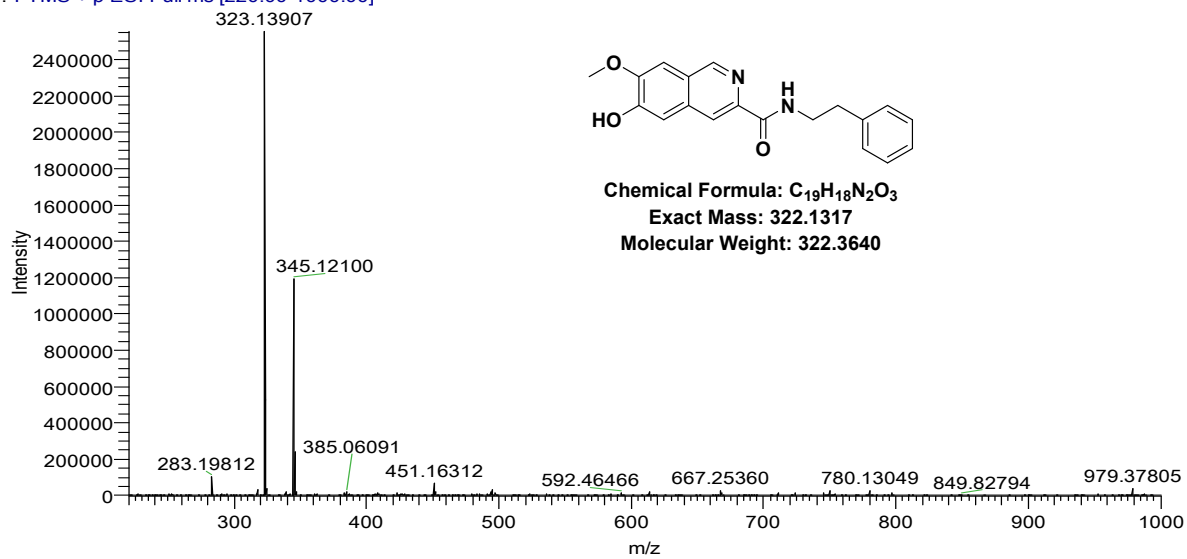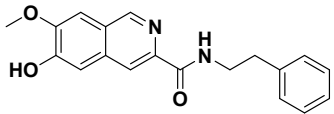

Chemical Formula:  $C_{19}H_{18}N_2O_3$   
Exact Mass: 322.1317  
Molecular Weight: 322.3640

10c: *N*-cyclohexyl-9*H*-pyrido[3,4-*b*]indole-3-carboxamide

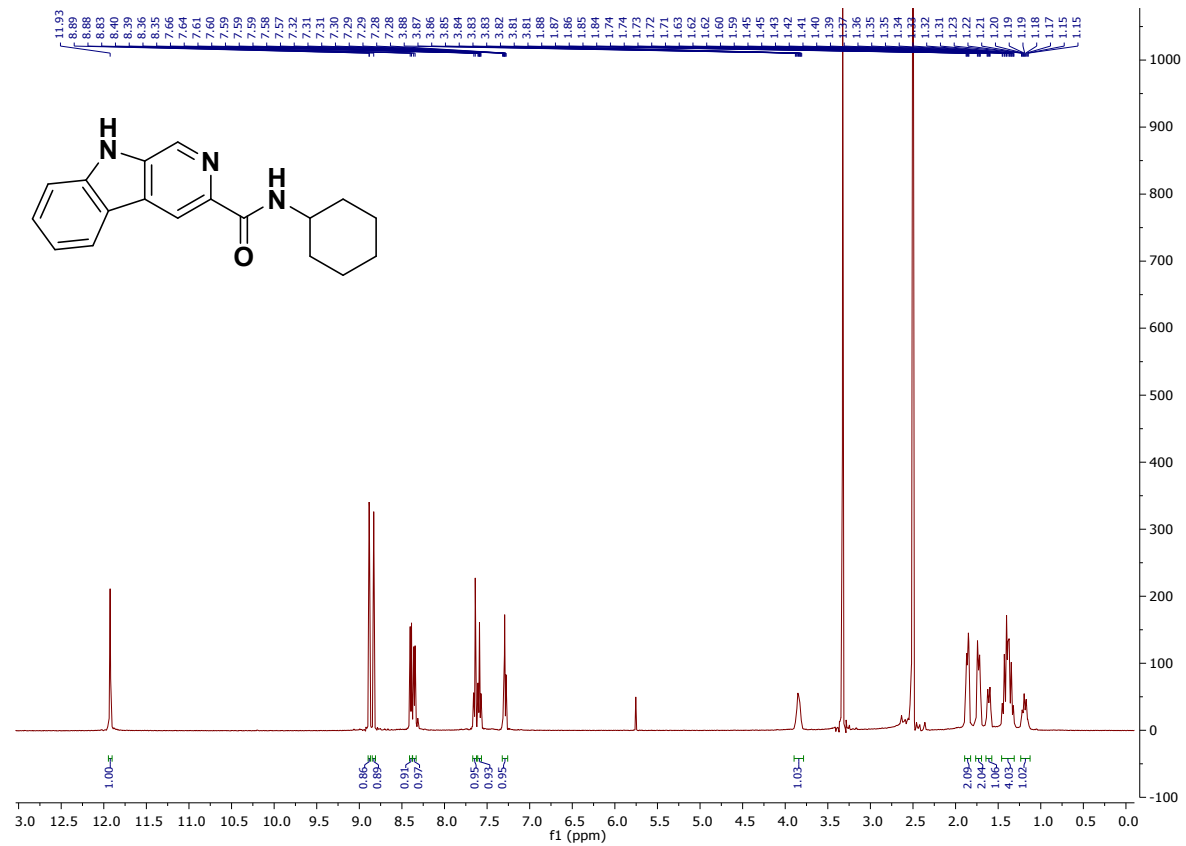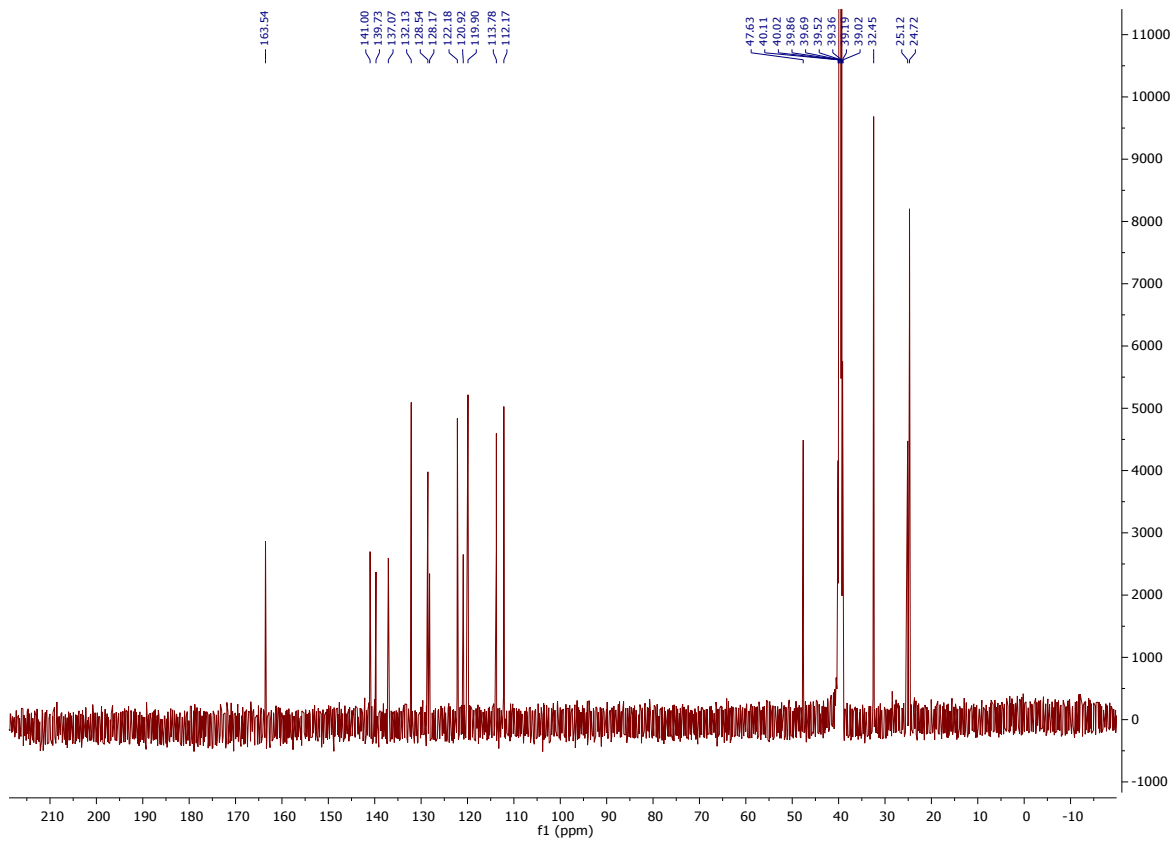

18mdv071-YZ494C #6 RT: 0.10591 AV: 1 NL: 1.49E7  
T: FTMS + p ESI Full ms [220.00-1000.00]

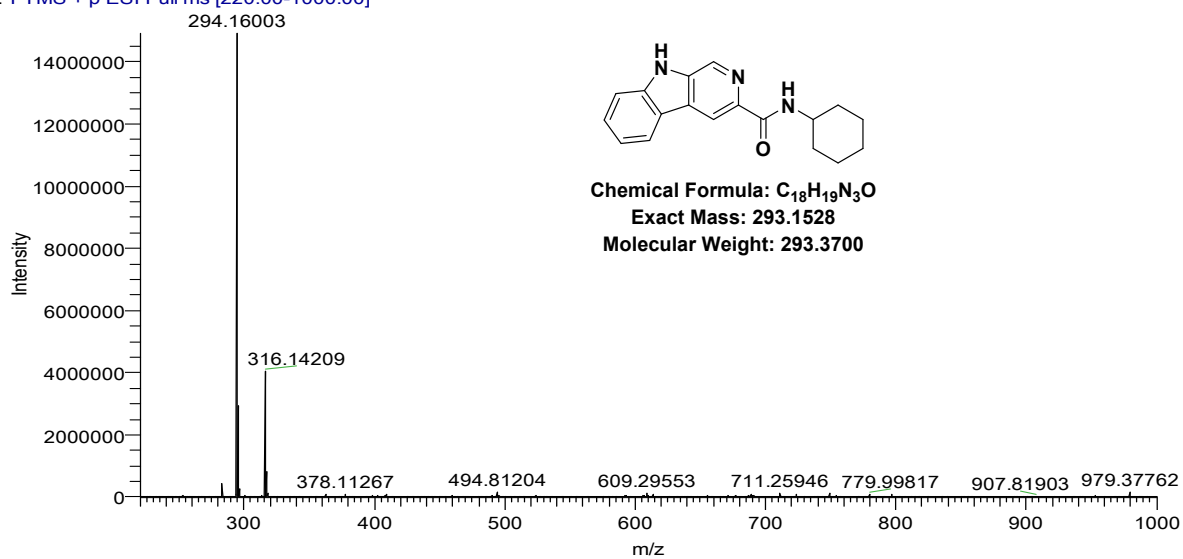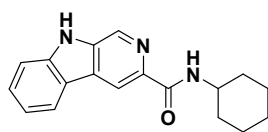

Chemical Formula:  $C_{18}H_{19}N_3O$

Exact Mass: 293.1528

Molecular Weight: 293.3700

# 10d: *N*-phenethyl-9*H*-pyrido[3,4-*b*]indole-3-carboxamide

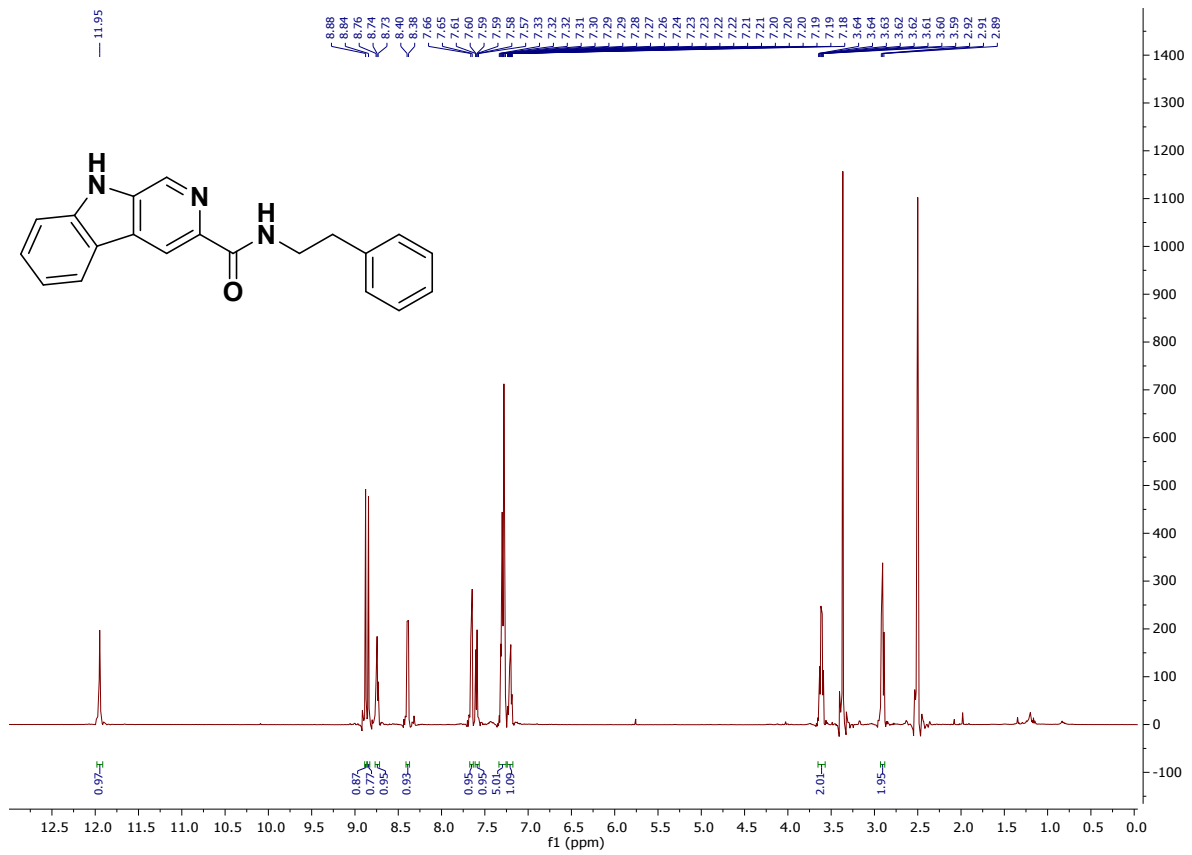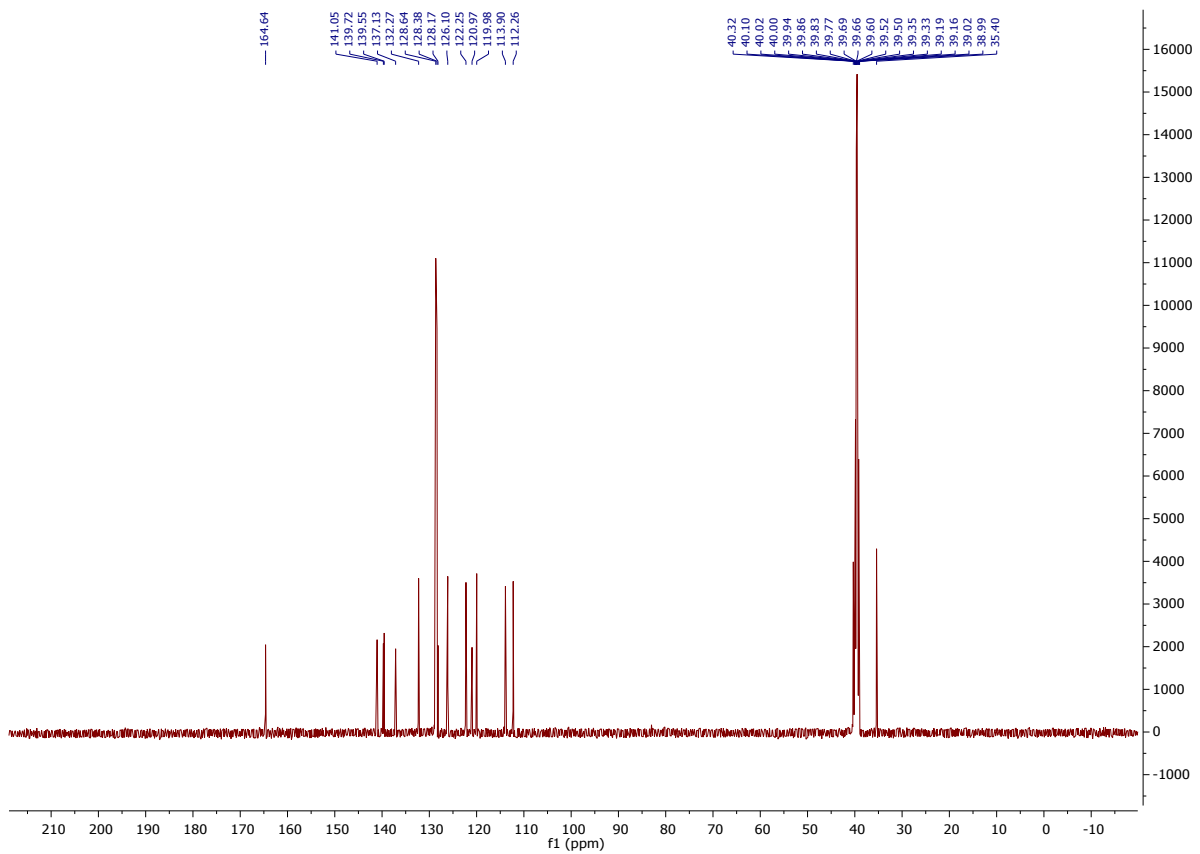

18mdv071-YZ490C #6 RT: 0.10627 AV: 1 NL: 8.04E6  
T: FTMS + p ESI Full ms [220.00-1000.00]

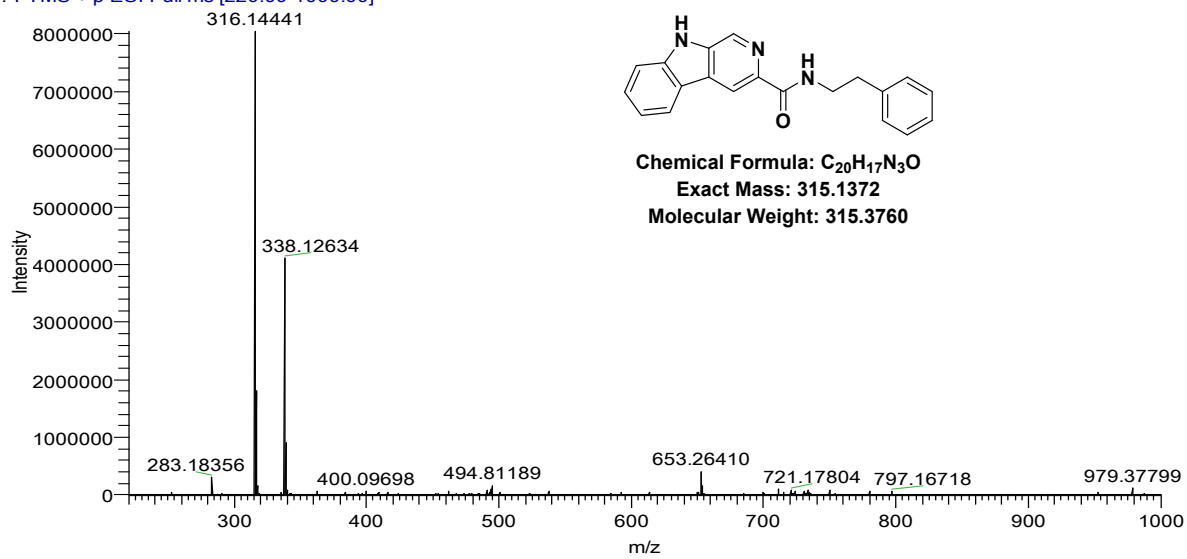

**12a: N-(2,2-dimethoxyethyl)-4-methyl-N-((1-phenethyl-1H-tetrazol-5-yl)(3,4,5-trimethoxyphenyl)methyl)benzenesulfonamide**

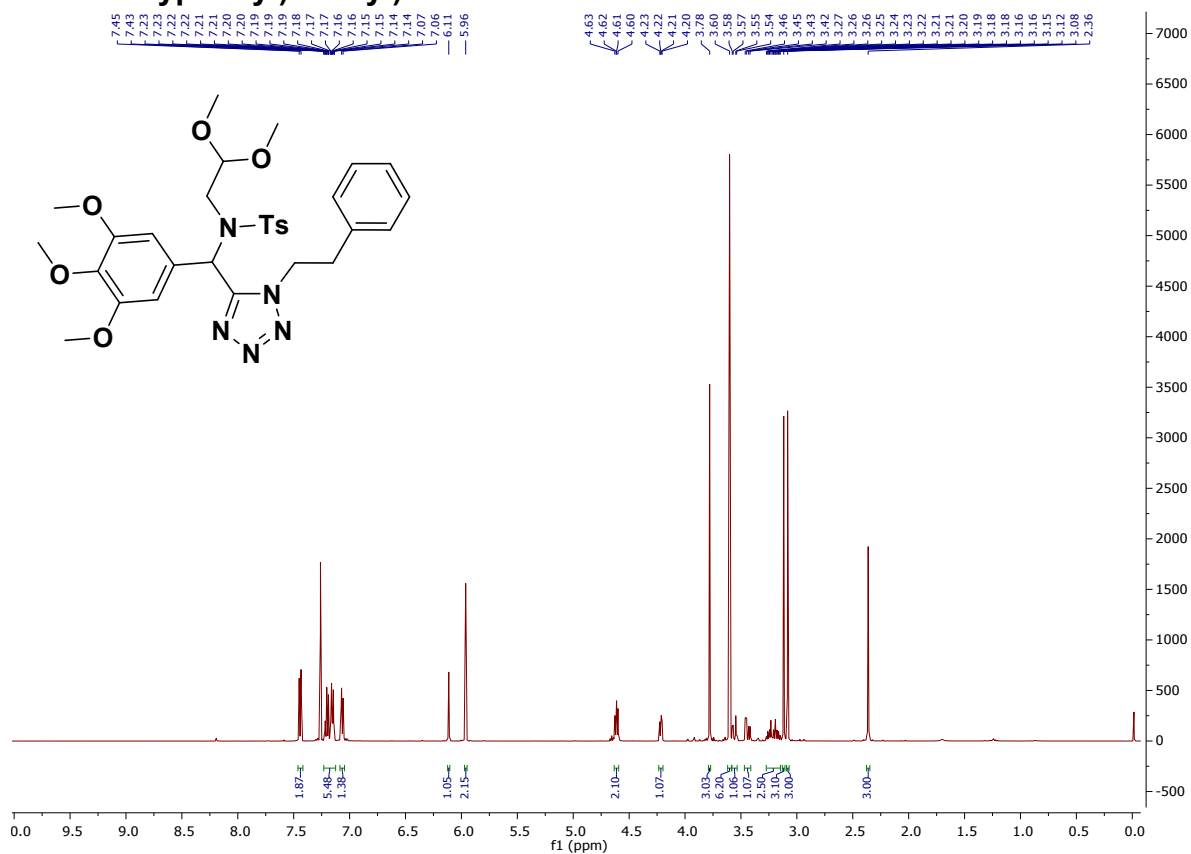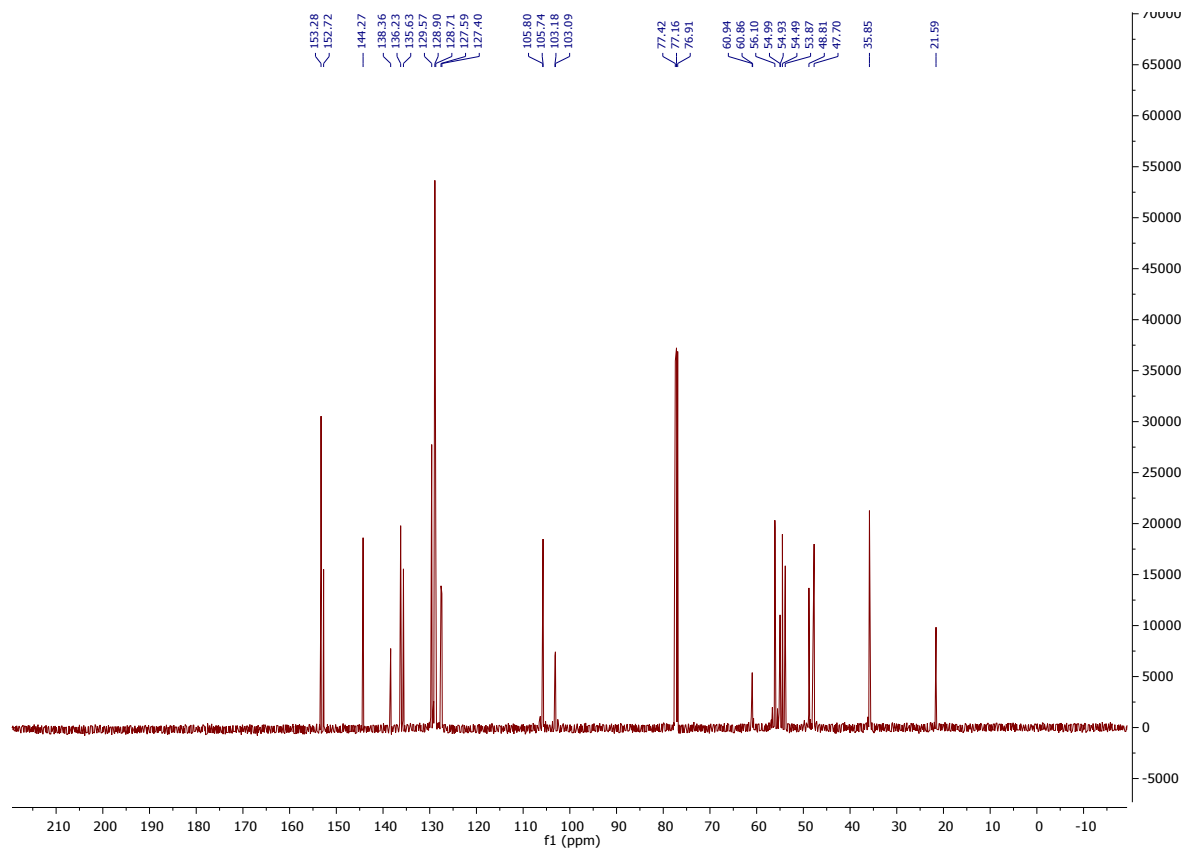

18mdv071-YZ454T #6 RT: 0.10504 AV: 1 NL: 2.07E7  
T: FTMS + p ESI Full ms [220.00-1000.00]

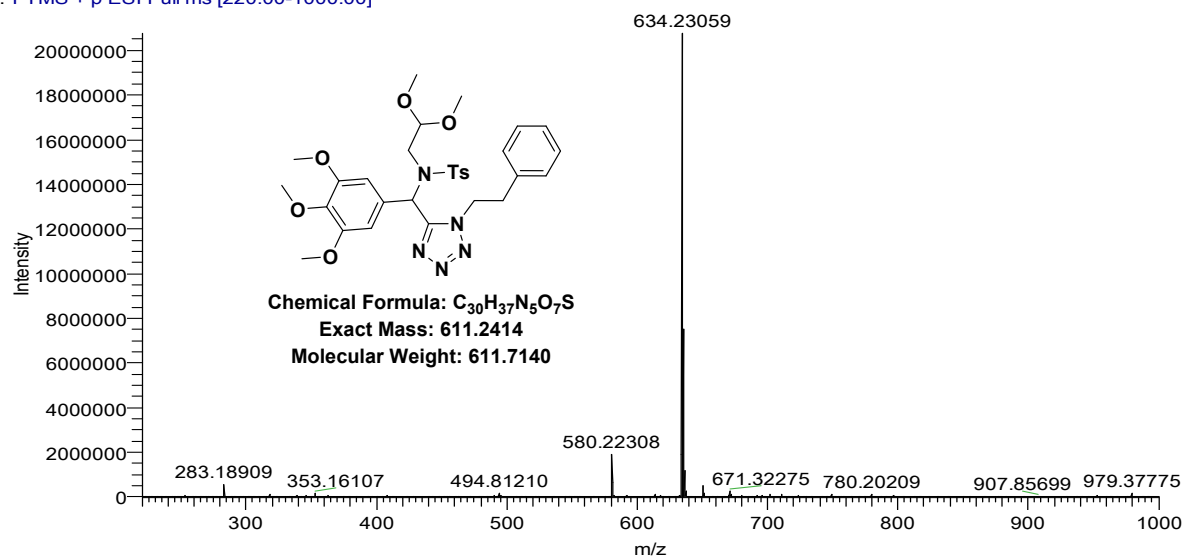

**13a: 5,6,7-trimethoxy-1-(1-phenethyl-1*H*-tetrazol-5-yl)-2-tosyl-1,2-dihydroisoquinoline**

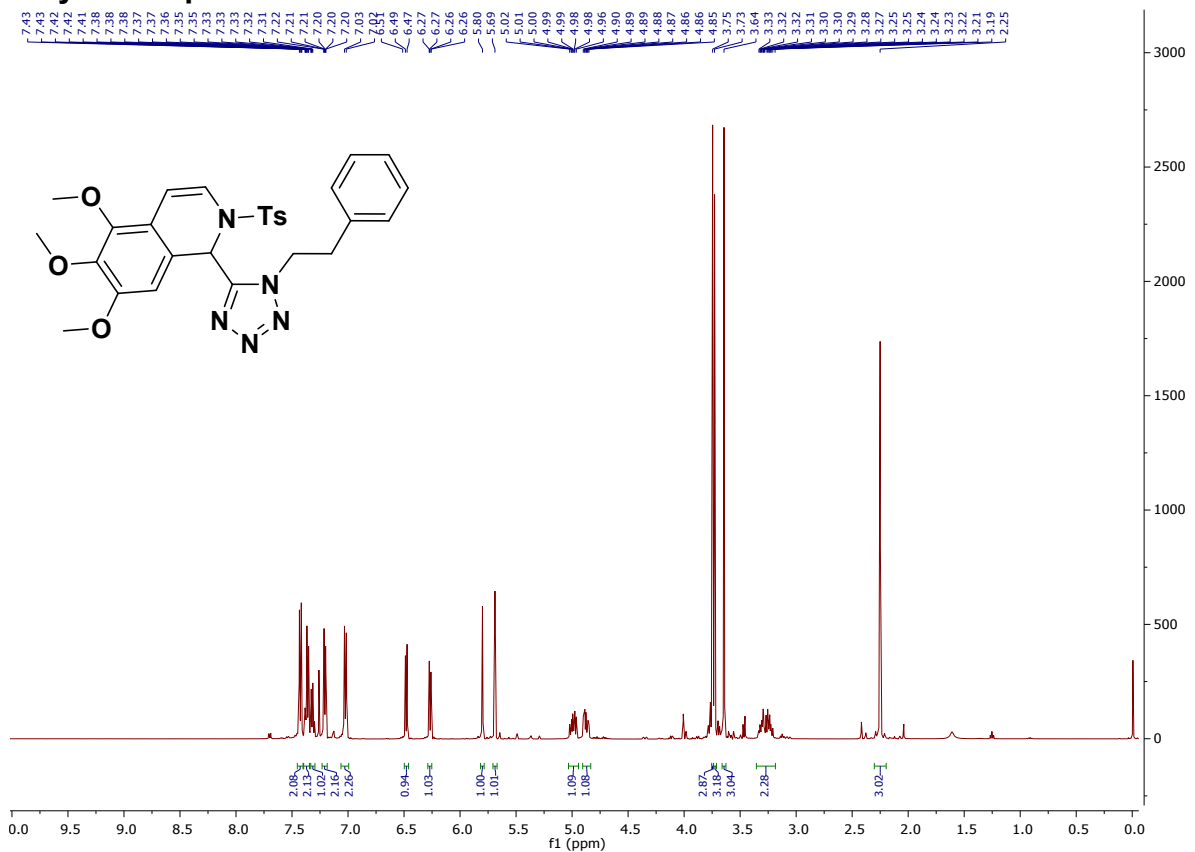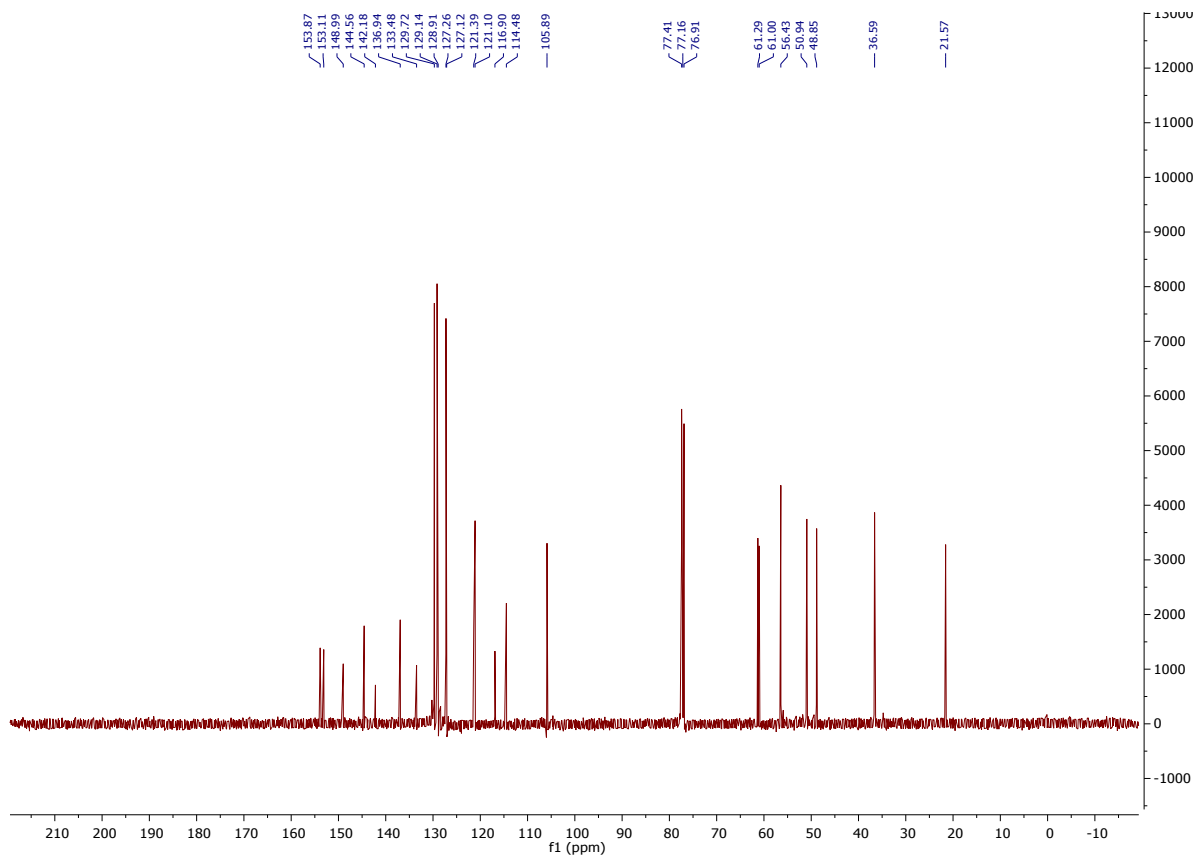



MSC-18MDV093-YZ454C #1534 RT: 6.84 AV: 1 NL: 1.26E8  
T: FTMS + p ESI Full ms [150.0000-1000.0000]

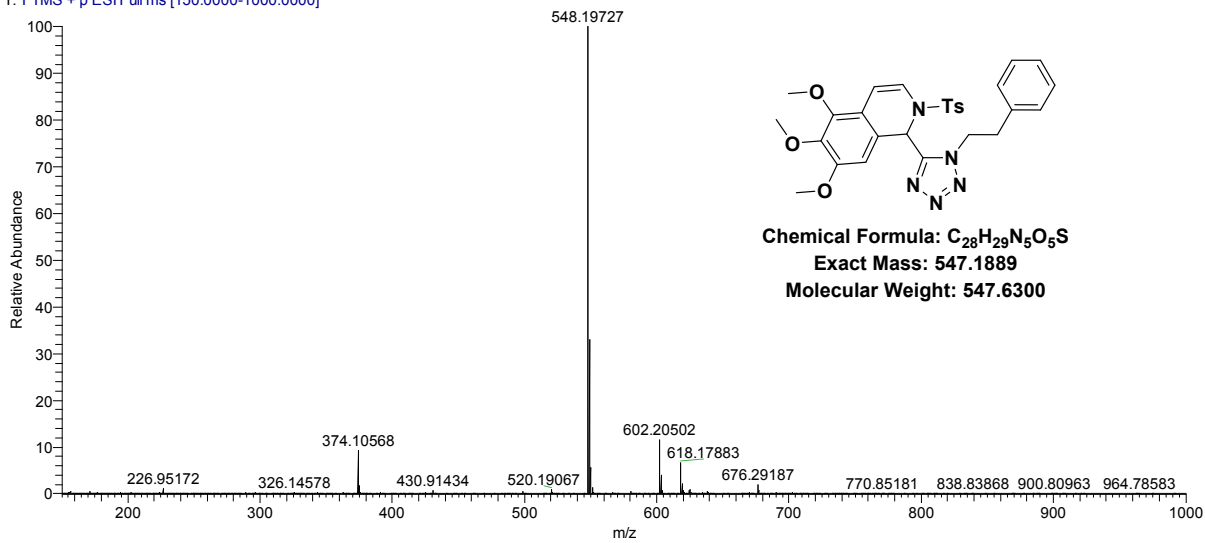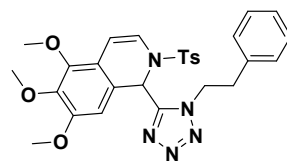

**Chemical Formula: C<sub>28</sub>H<sub>29</sub>N<sub>5</sub>O<sub>5</sub>S**  
**Exact Mass: 547.1889**  
**Molecular Weight: 547.6300**

**12b: *N*-((1-cyclohexyl-1*H*-tetrazol-5-yl)(2,5-dimethoxyphenyl)methyl)-*N*-(2,2-dimethoxyethyl)-4-methylbenzenesulfonamide**

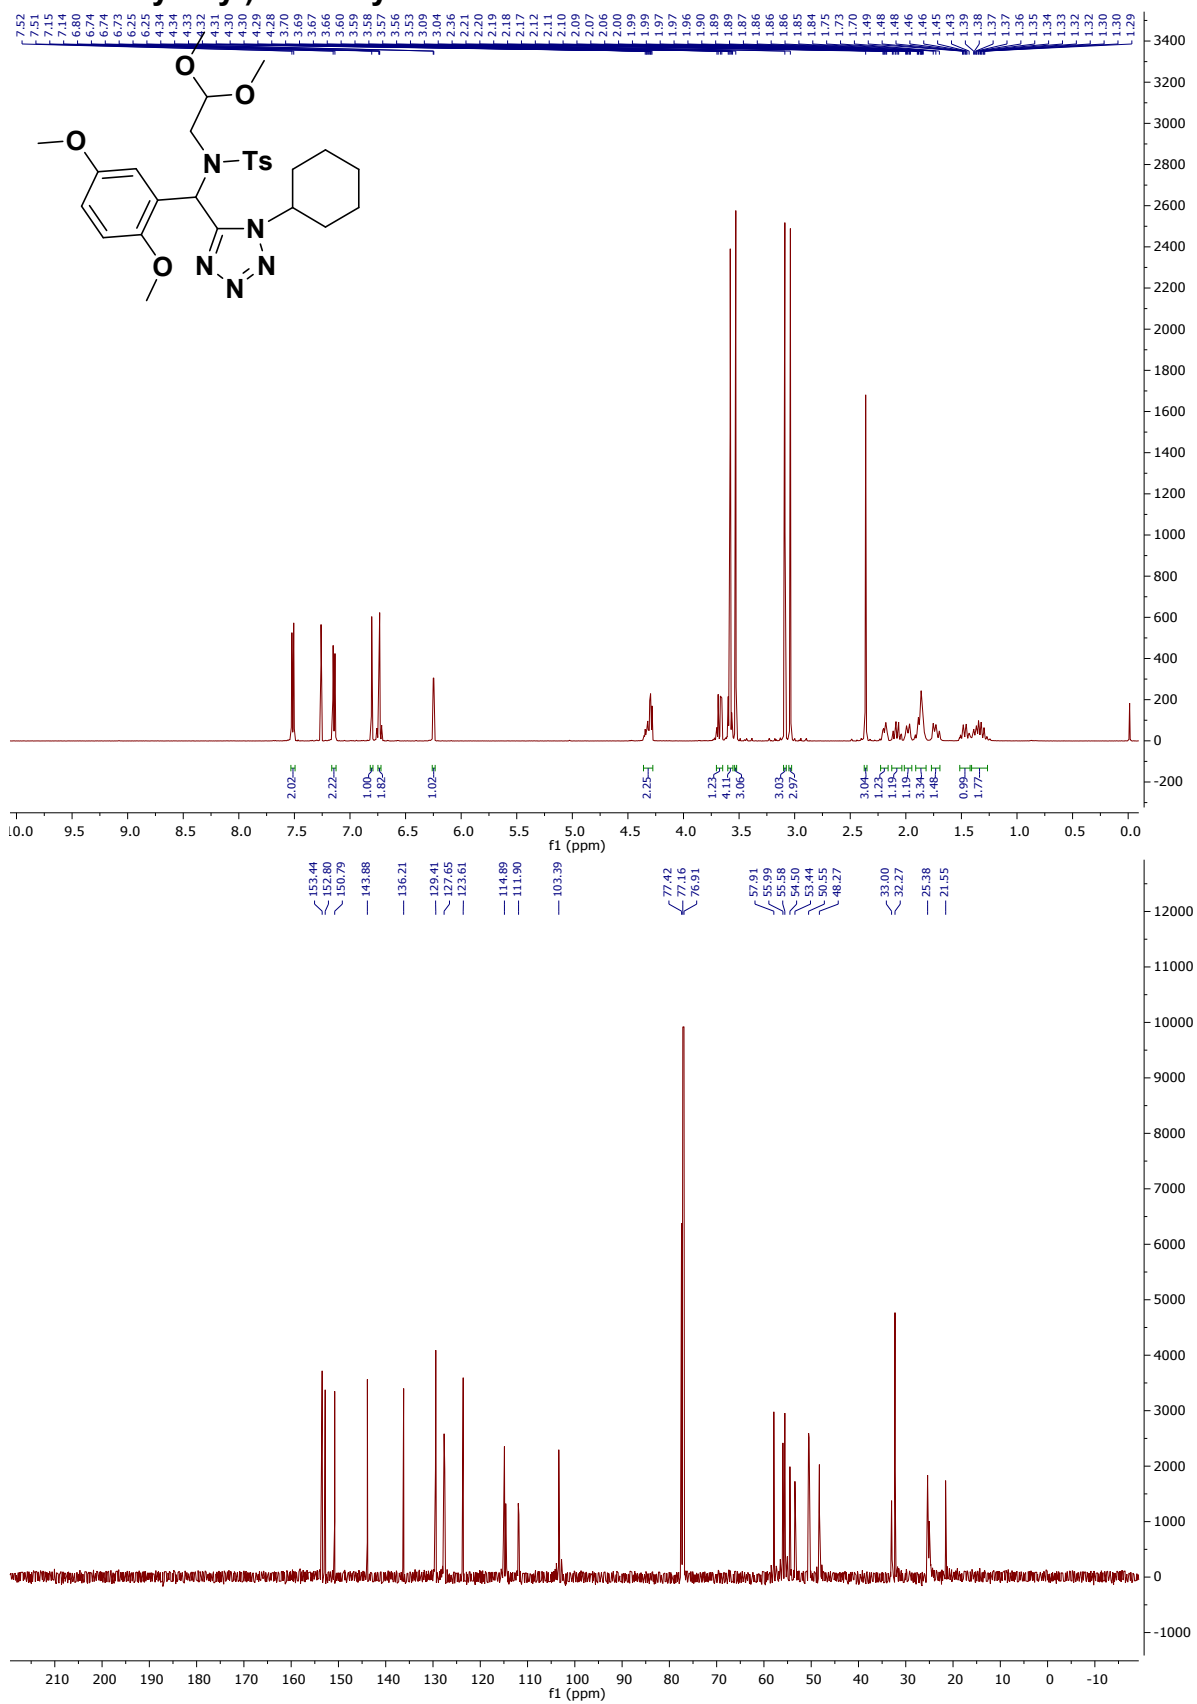

18mdv071-YZ381T #6 RT: 0.10197 AV: 1 NL: 2.54E7  
T: FTMS + p ESI Full ms [220.00-1000.00]

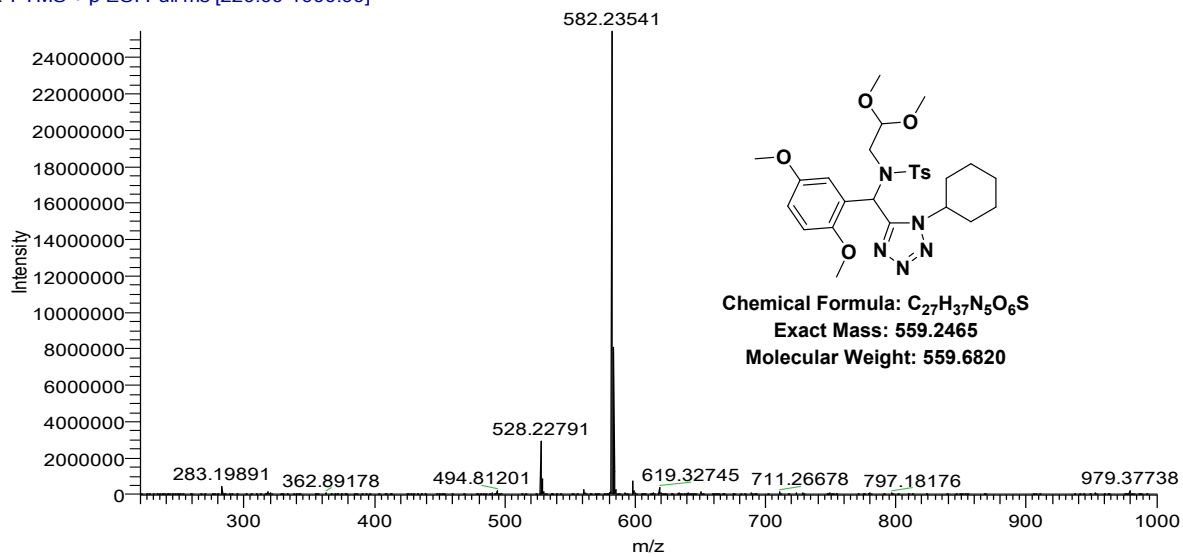

**13b: 1-(1-cyclohexyl-1H-tetrazol-5-yl)-5,8-dimethoxy-2-tosyl-1,2-dihydroisoquinoline**

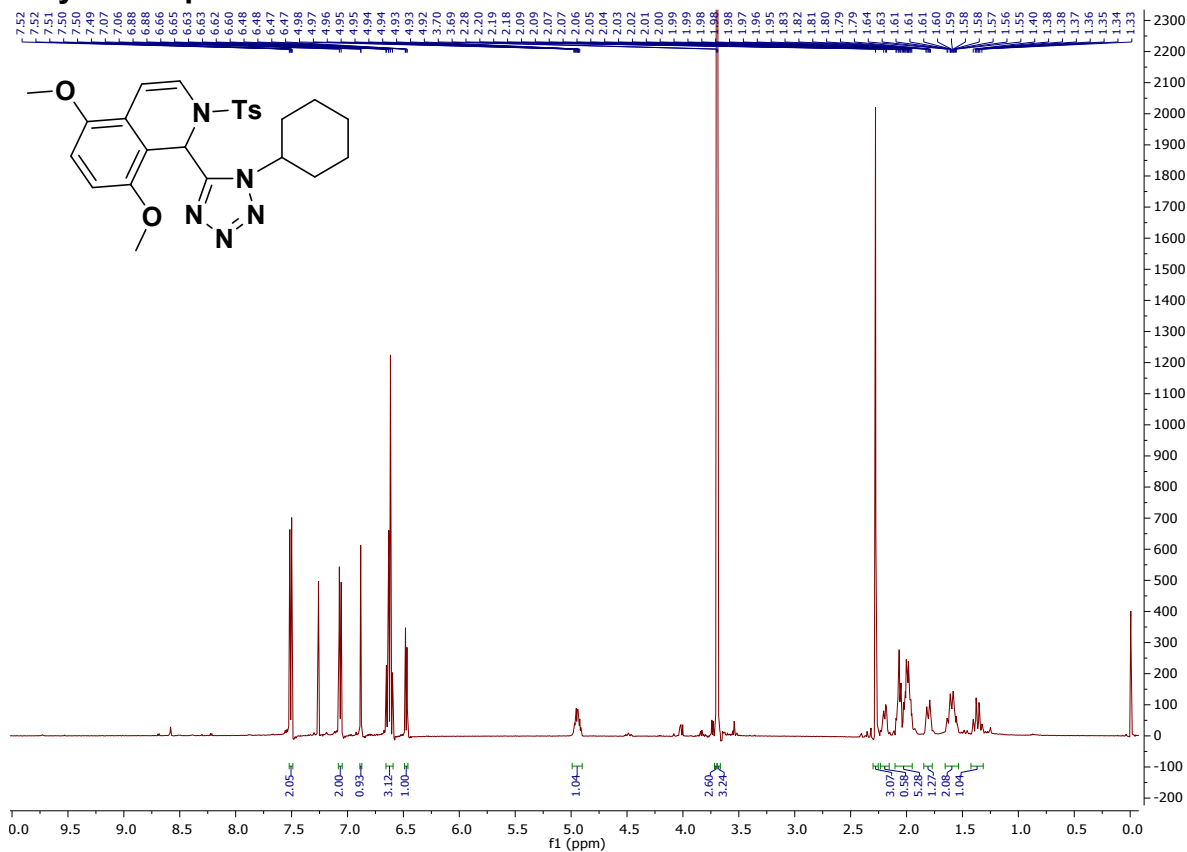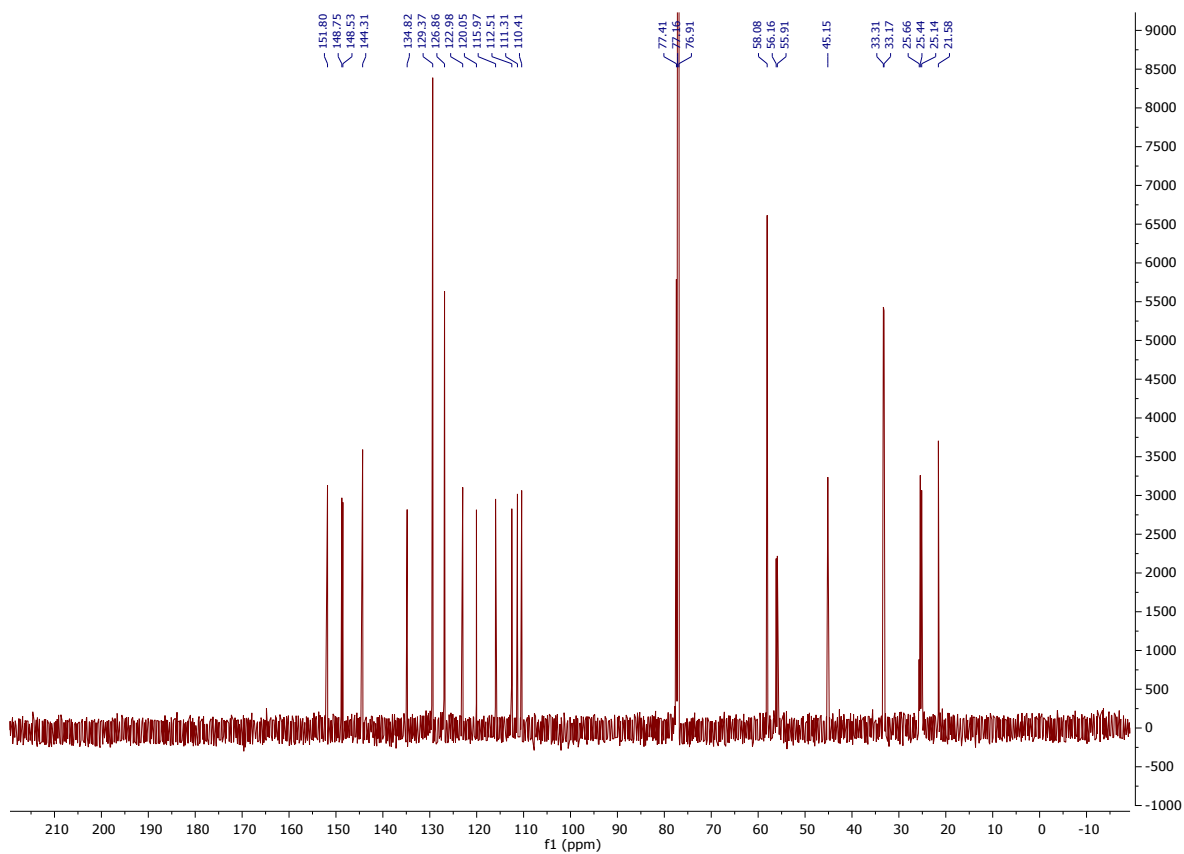

18mdv071-YZ381C #10 RT: 0.17649 AV: 1 NL: 1.69E6  
T: FTMS + p ESI Full ms [220.00-1000.00]

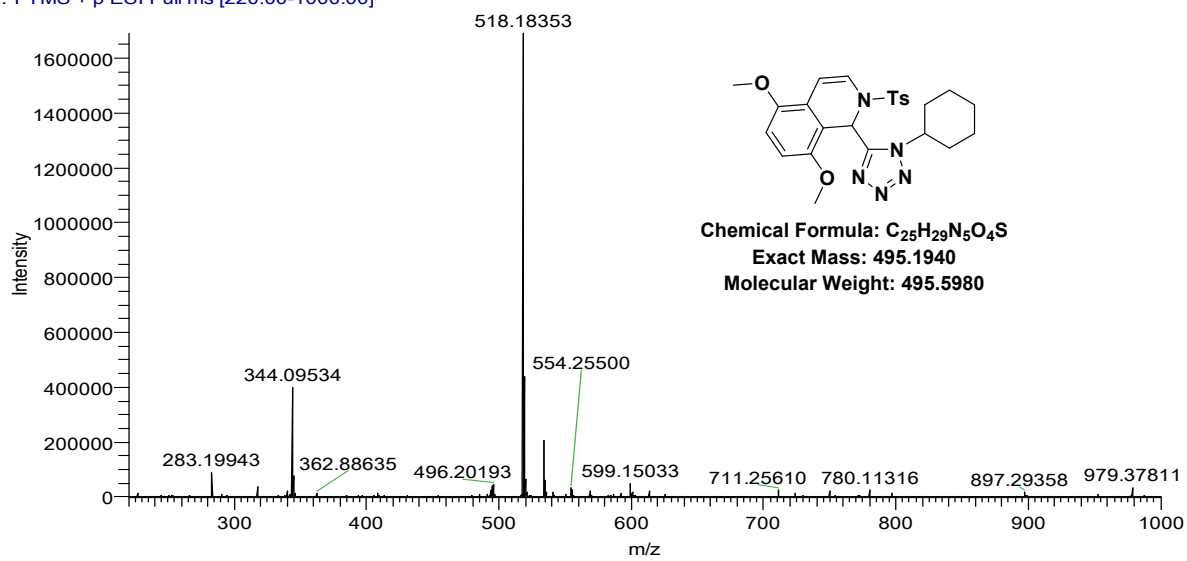

**12c: 2-(5-(((N-(2,2-dimethoxyethyl)-4-methylphenyl)sulfonamido)(2,5-dimethoxyphenyl)methyl)-1H-tetrazol-1-yl)-N-(4-fluorobenzyl)acetamide**

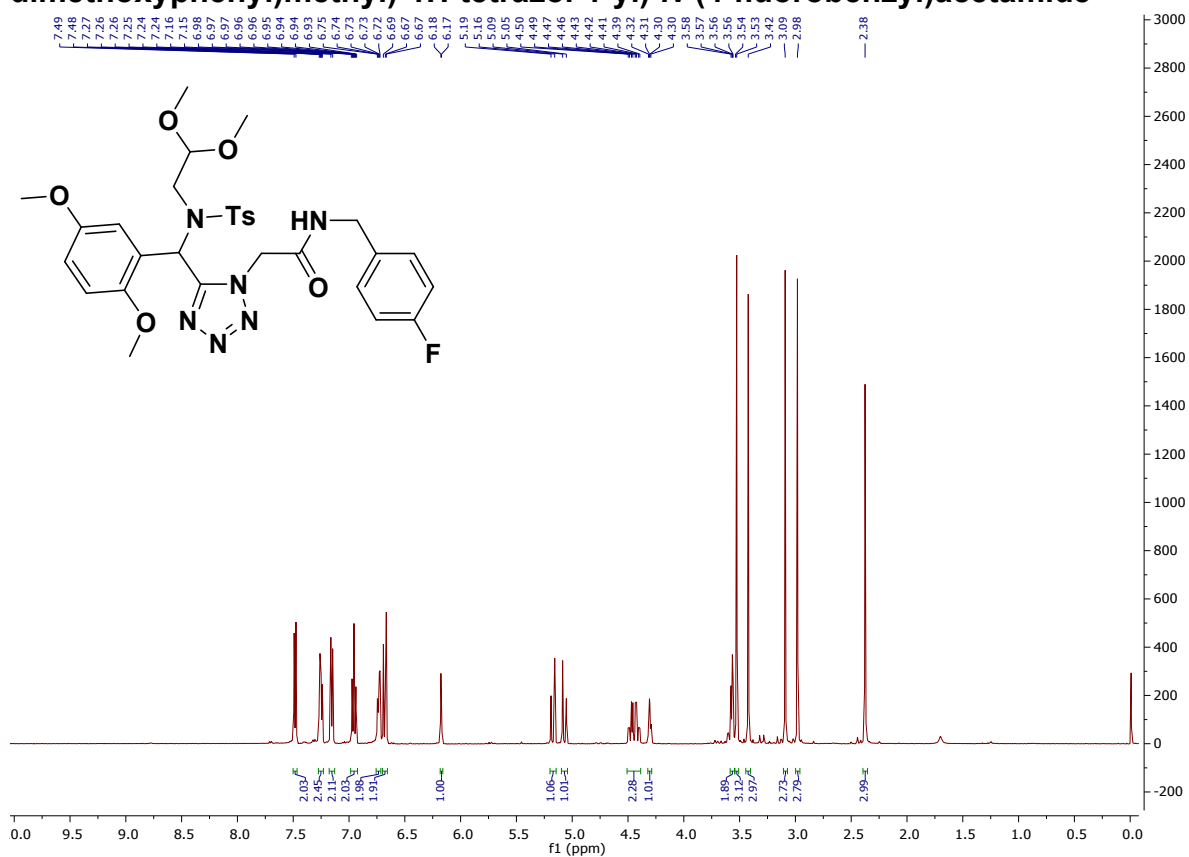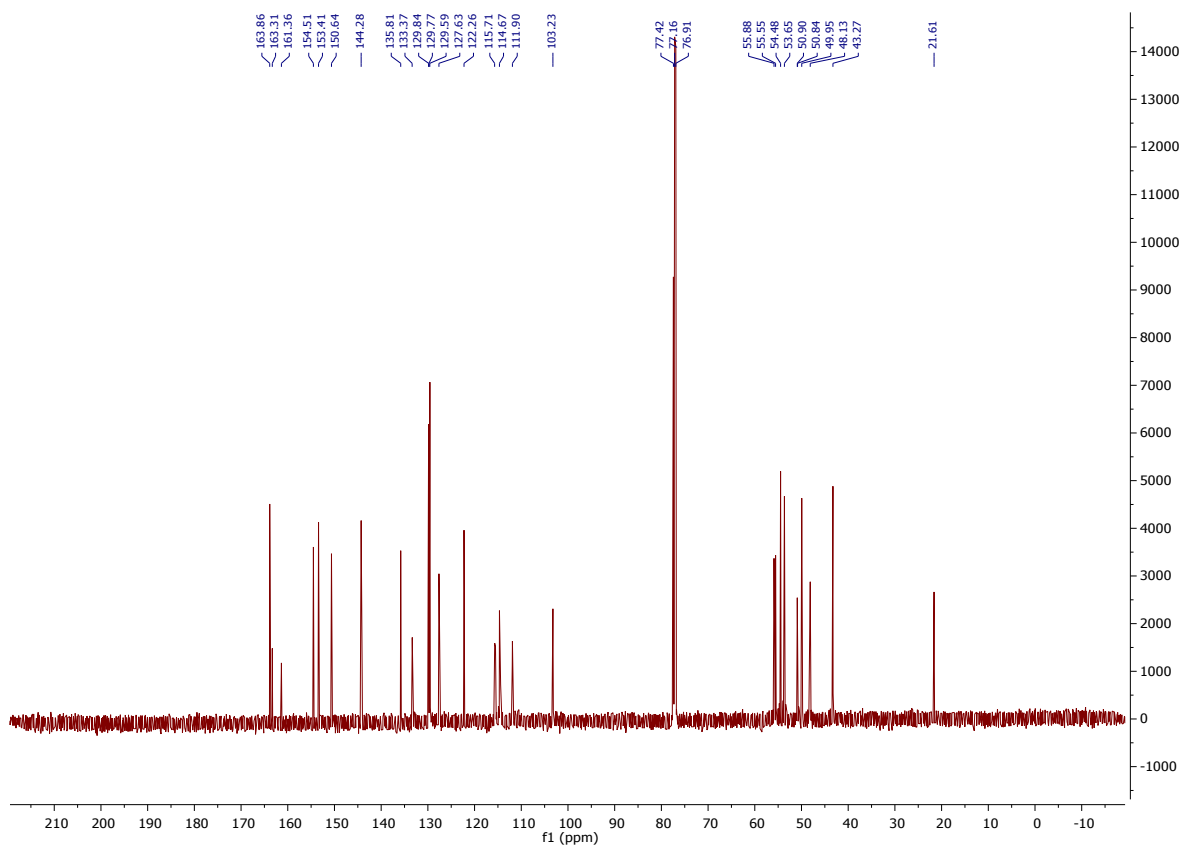

18mdv071-yz382T #6 RT: 0.10387 AV: 1 NL: 1.85E7  
T: FTMS + p ESI Full ms [220.00-1000.00]

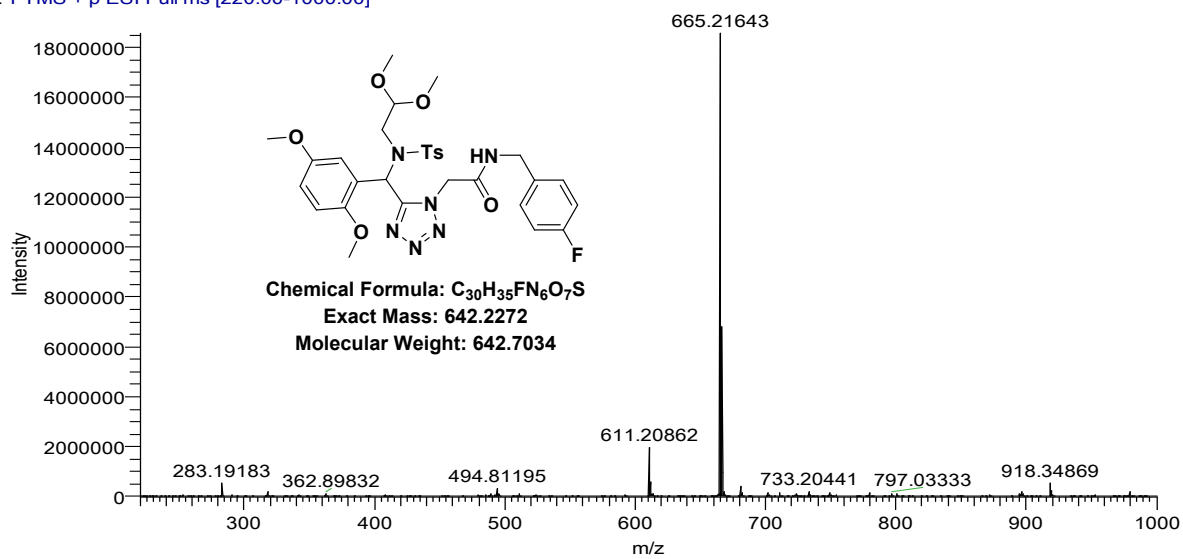

**13c: 2-(5-(5,8-dimethoxy-2-tosyl-1,2-dihydroisoquinolin-1-yl)-1*H*-tetrazol-1-yl)-*N*-(4-fluorobenzyl)acetamide**

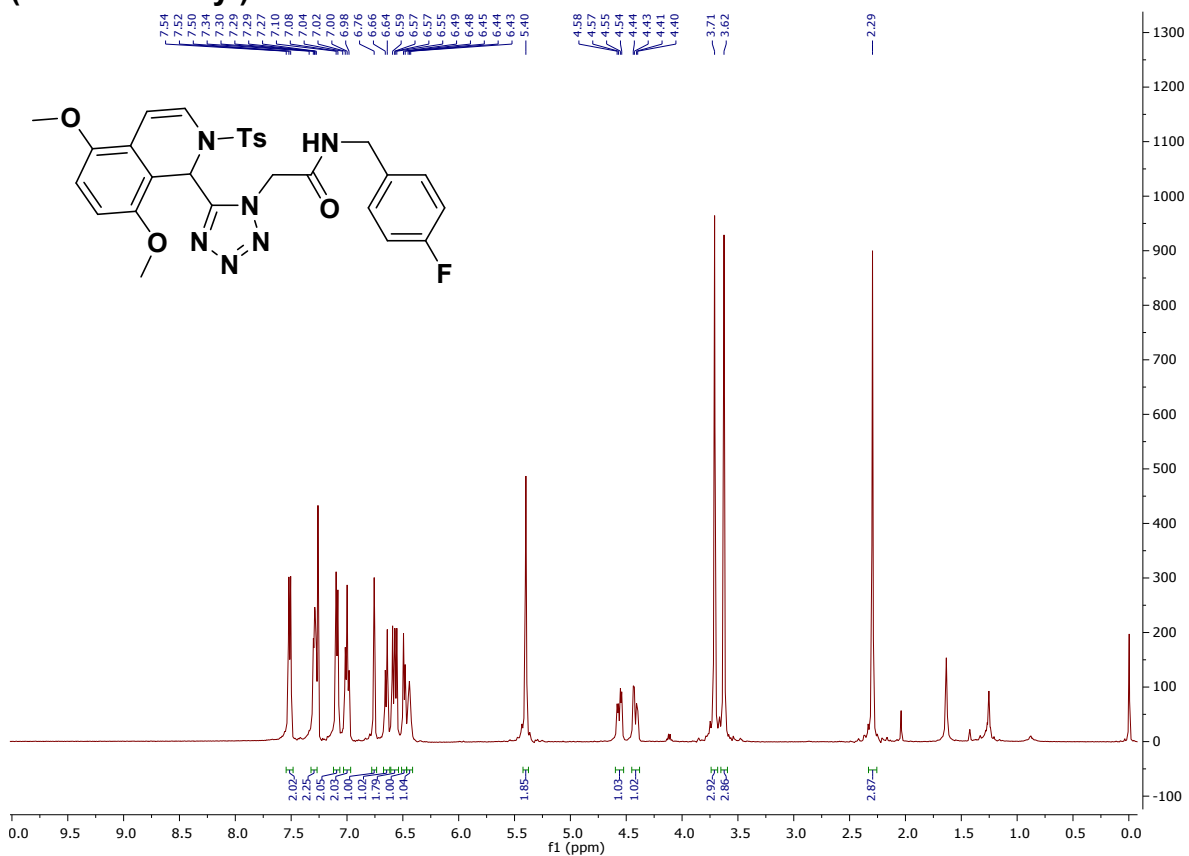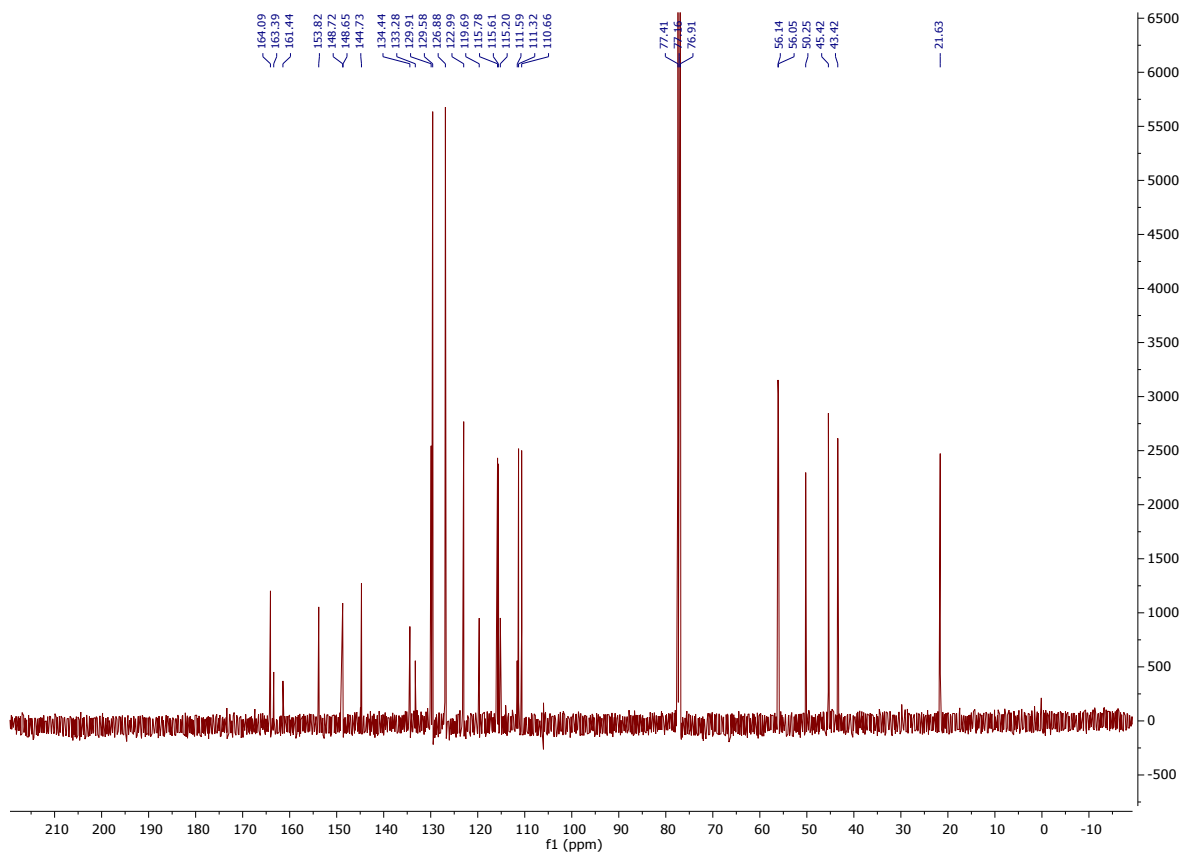



18mdv071-yz382C #7 RT: 0.12150 AV: 1 NL: 1.21E7  
T: FTMS + p ESI Full ms [220.00-1000.00]

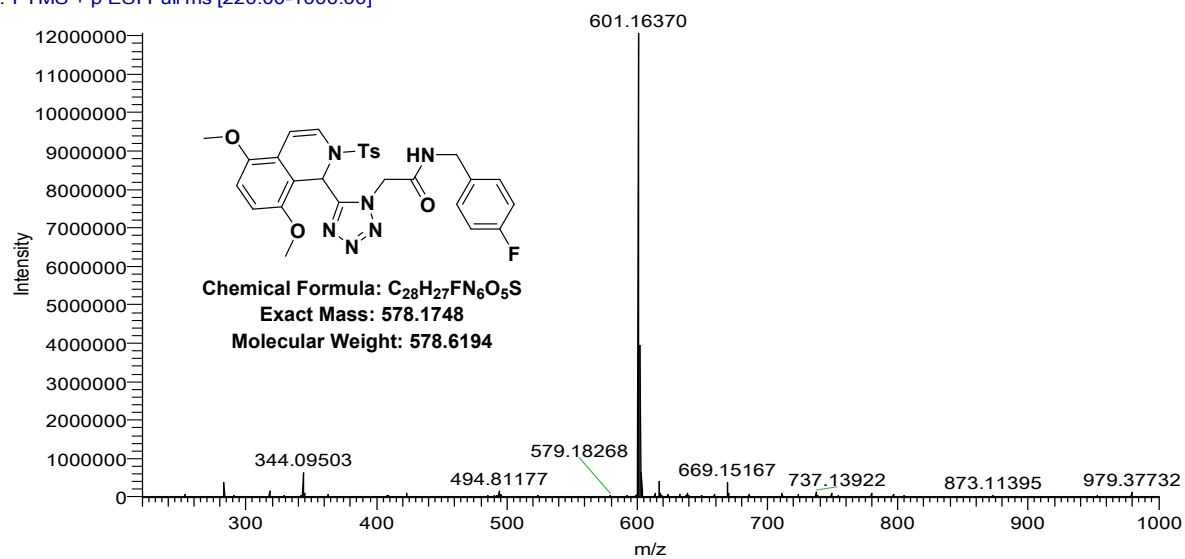

# 12d: N-(2,2-dimethoxyethyl)-N-((2,5-dimethoxyphenyl)(1-phenethyl-1H-tetrazol-5-yl)methyl)-4-methylbenzenesulfonamide

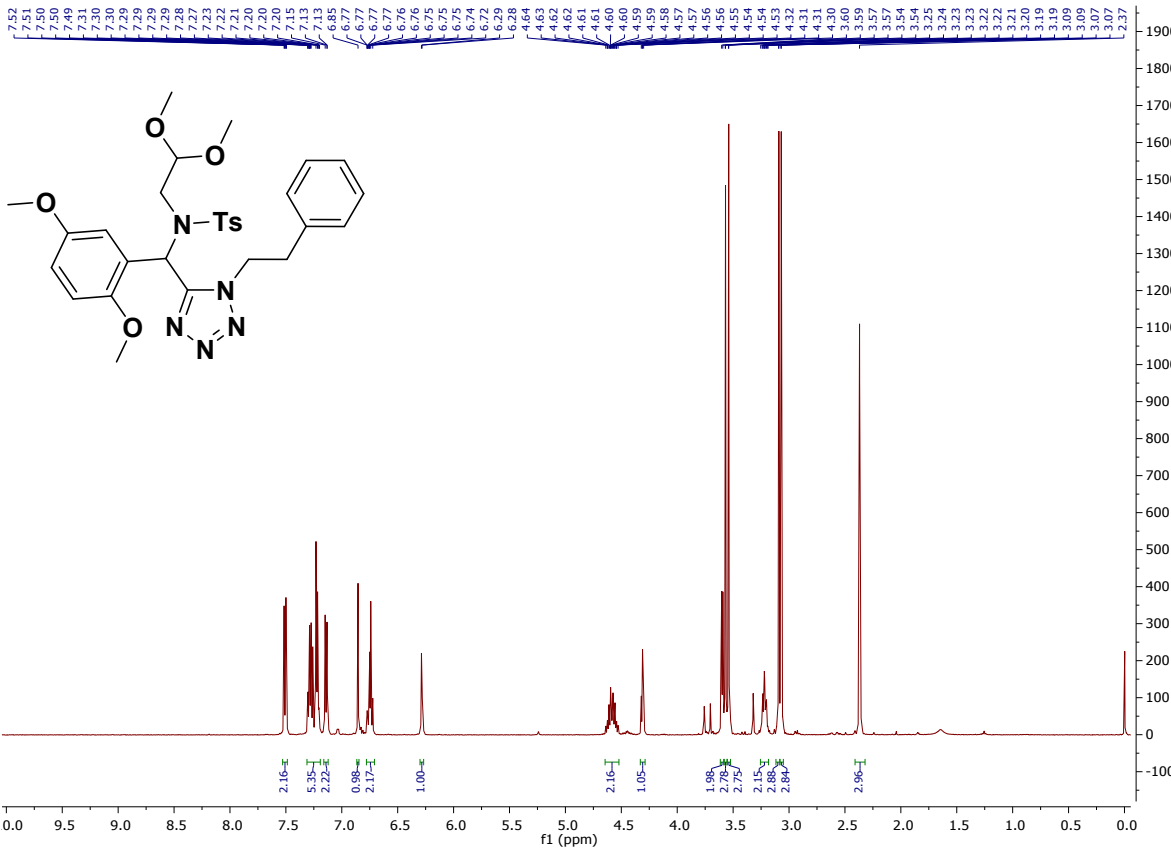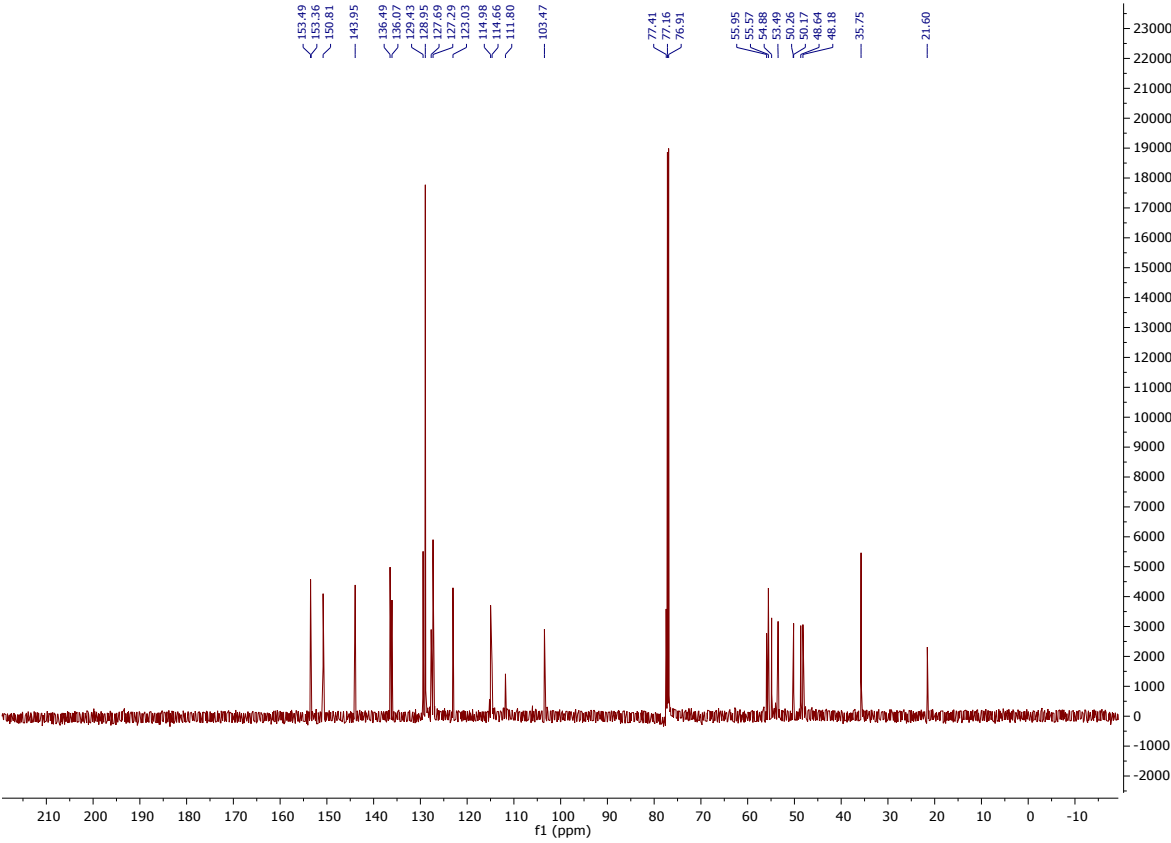

MSC-18MDV093-YZ377 #1512 RT: 6.74 AV: 1 NL: 1.76E9  
T: FTMS + p ESI Full ms [150.0000-1000.0000]

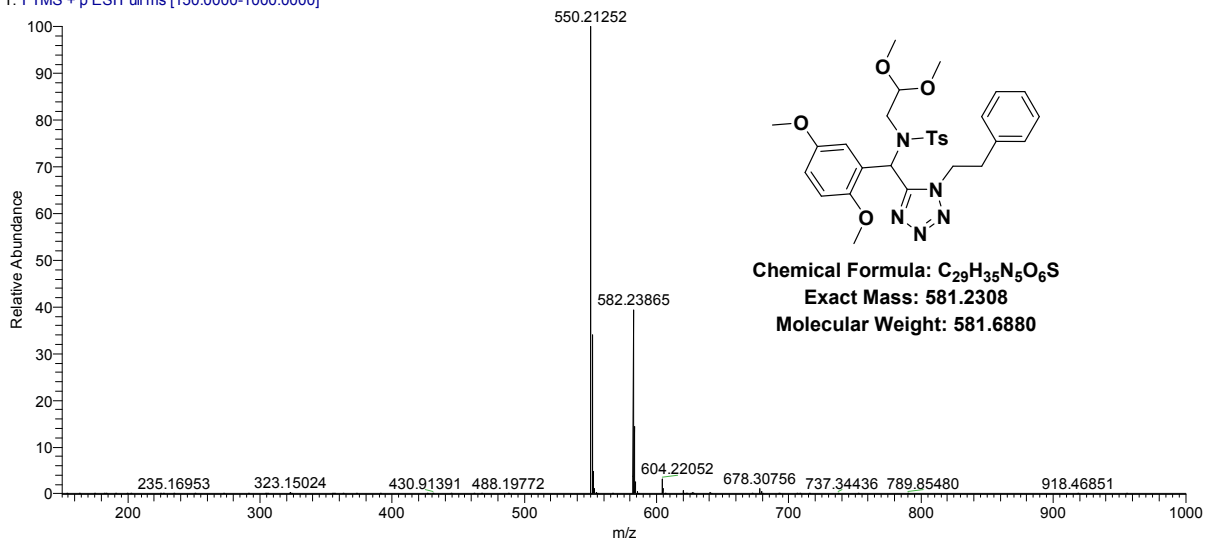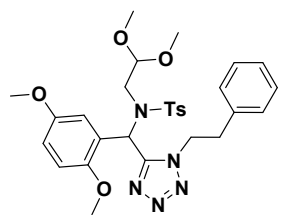

**Chemical Formula: C<sub>29</sub>H<sub>35</sub>N<sub>5</sub>O<sub>6</sub>S**  
**Exact Mass: 581.2308**  
**Molecular Weight: 581.6880**

**13d: 5,8-dimethoxy-1-(1-phenethyl-1*H*-tetrazol-5-yl)-2-tosyl-1,2-dihydroisoquinoline**

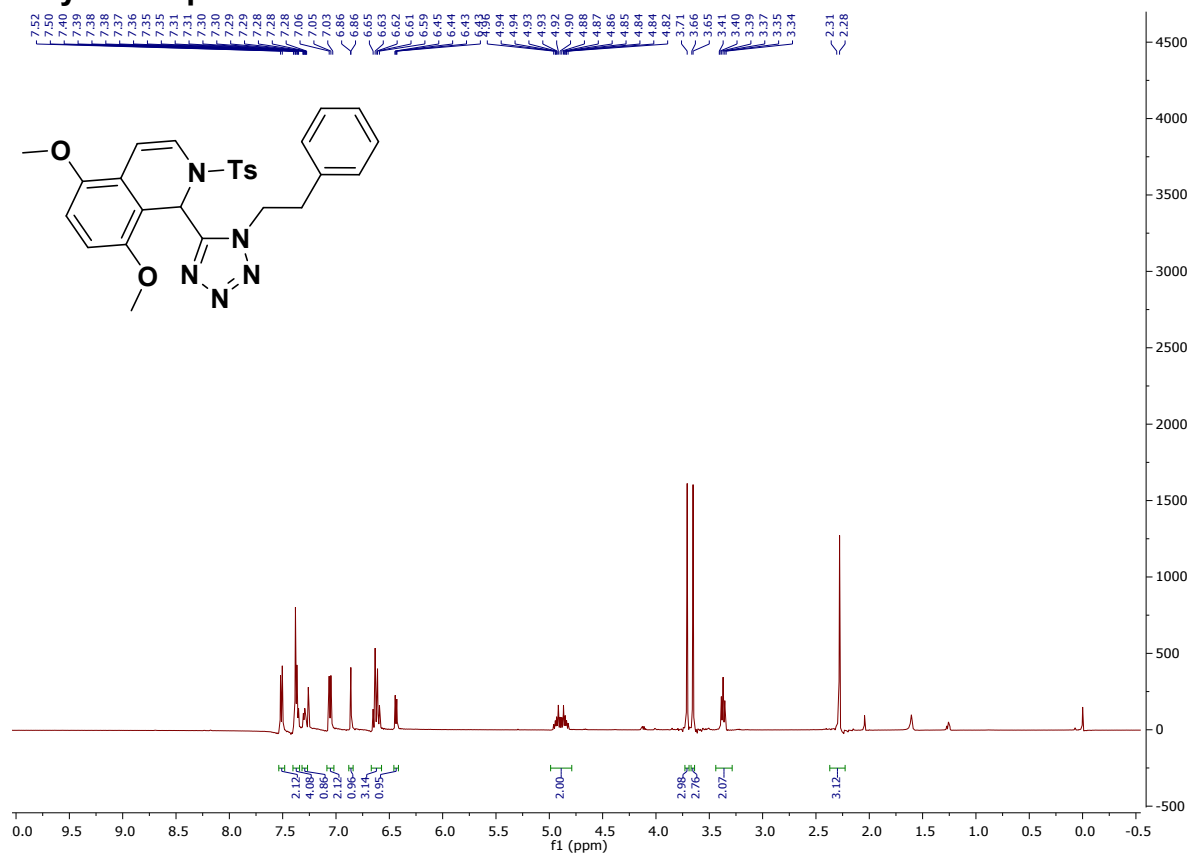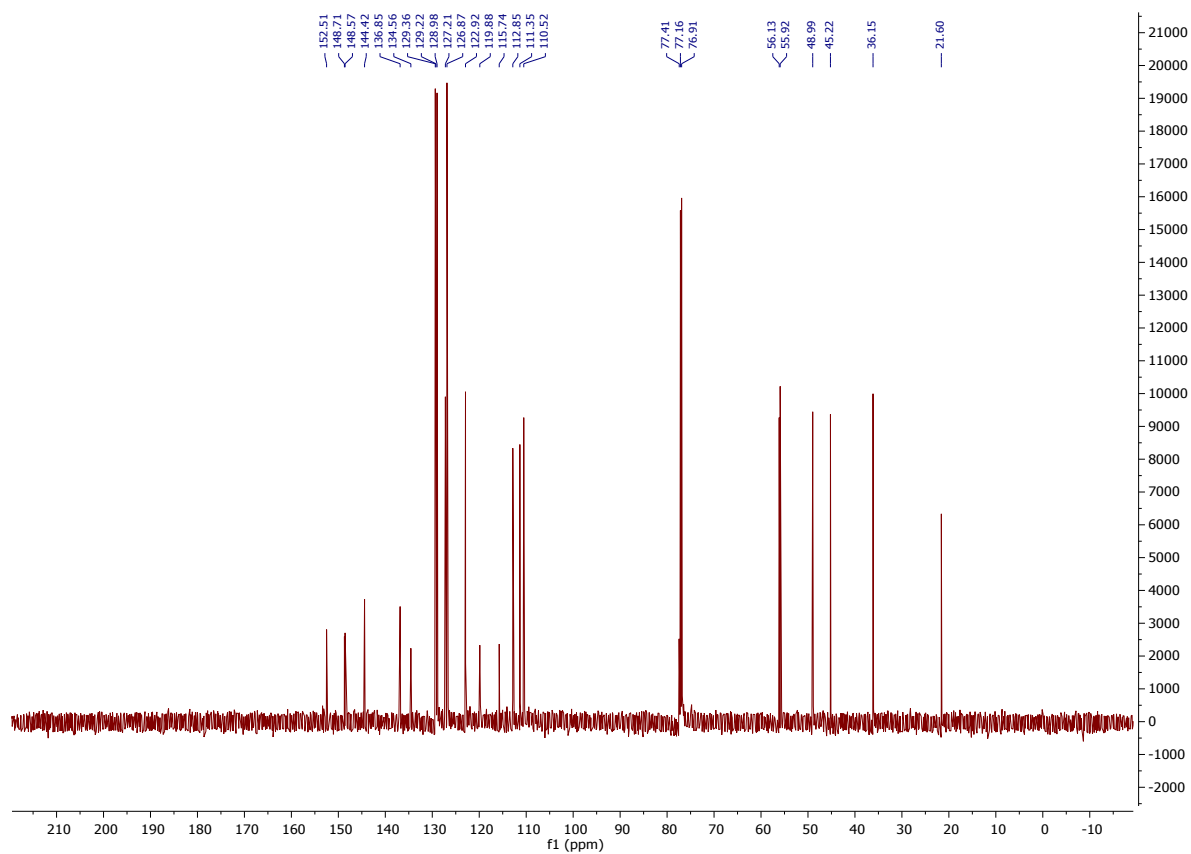

18mdv071-yz377C #6 RT: 0.10229 AV: 1 NL: 2.93E7  
T: FTMS + p ESI Full ms [220.00-1000.00]

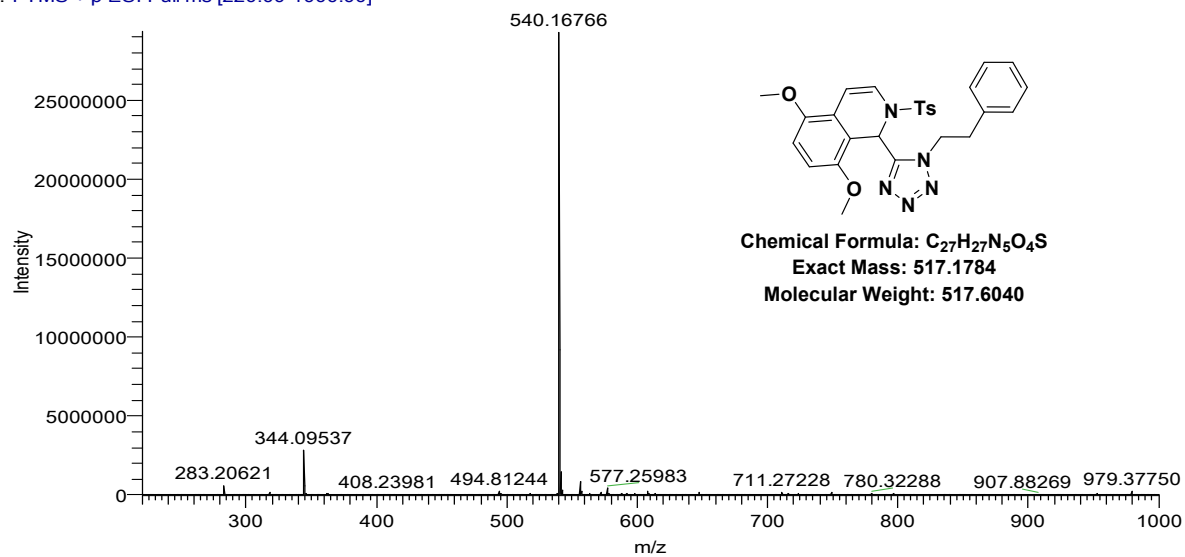

**14: 7-(2,2-dimethoxyethyl)-8-(3,5-dimethoxyphenyl)-7,8-dihydro-1H-tetrazolo[1,5-a]pyrazin-6(5H)-one**

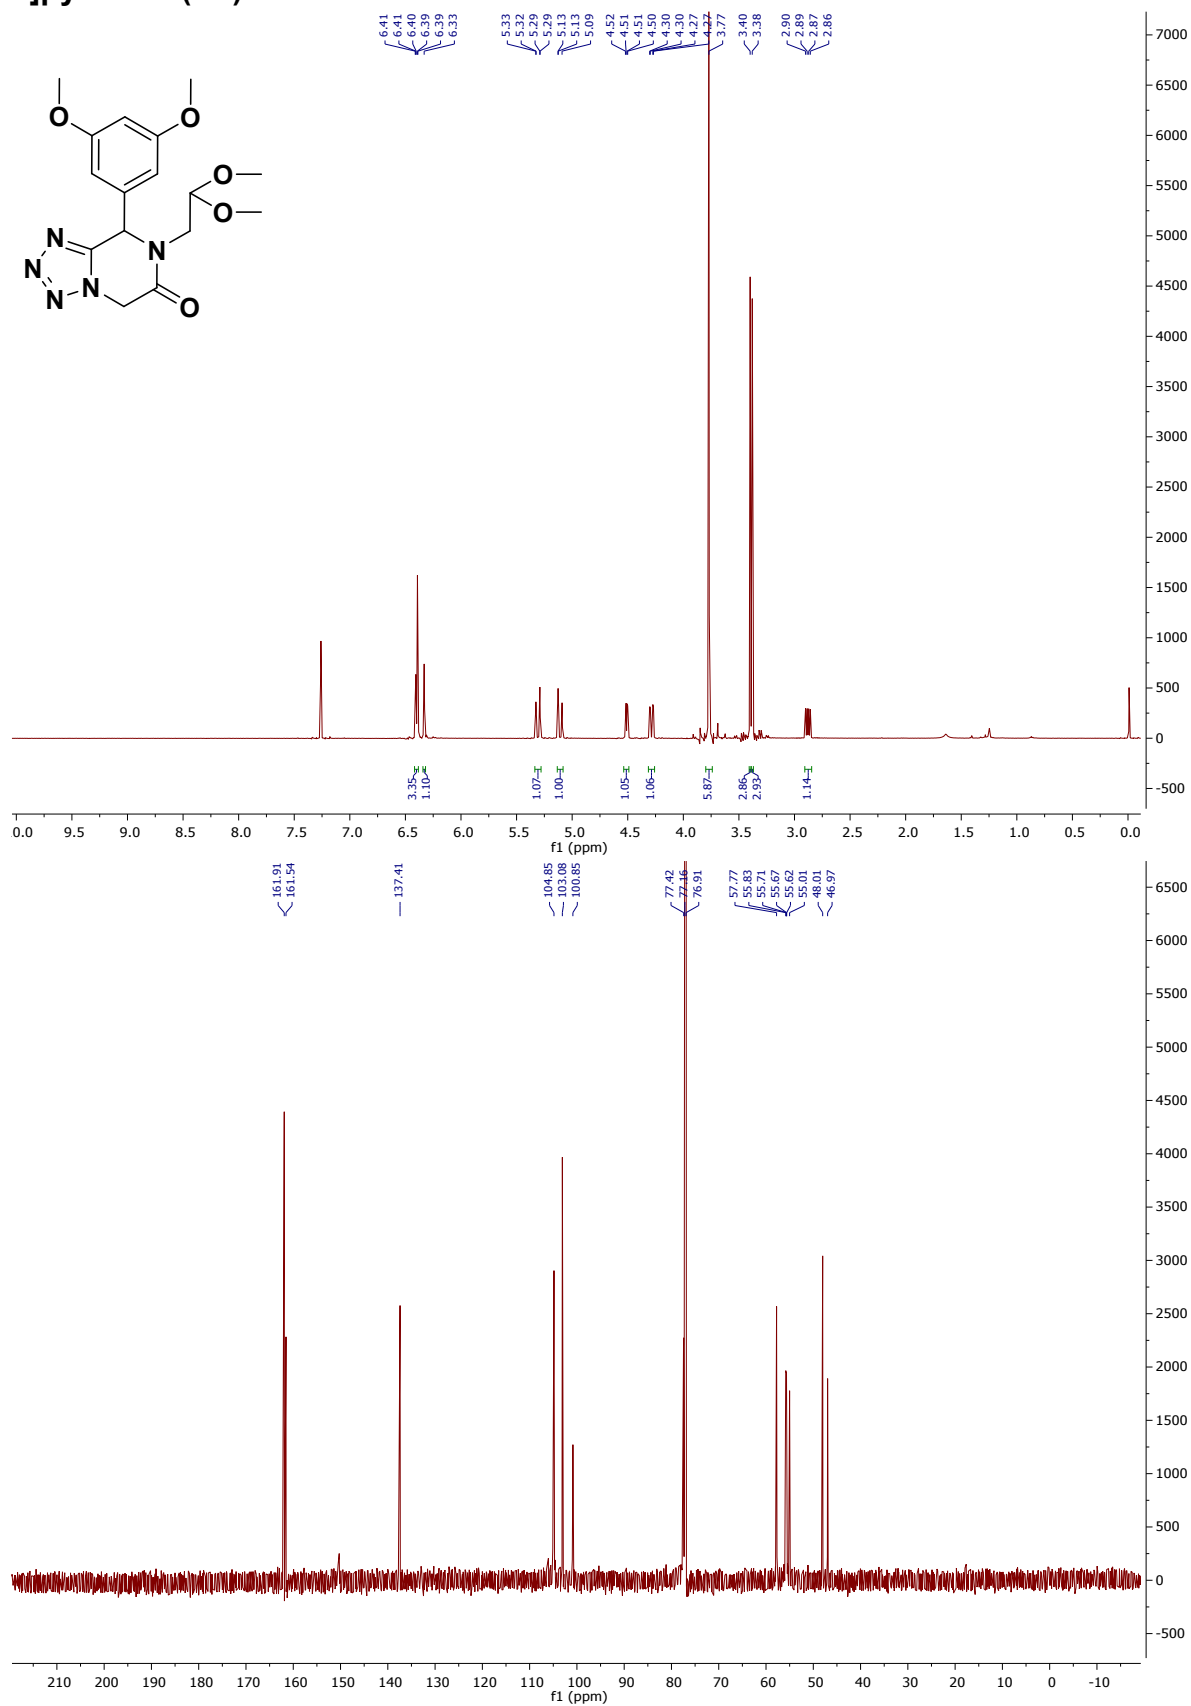

MSC-18MDV093-YZ261 #935 RT: 4.16558 AV: 1 NL: 2.13E8

T: FTMS + p ESI Full ms [150.0000-1000.0000]

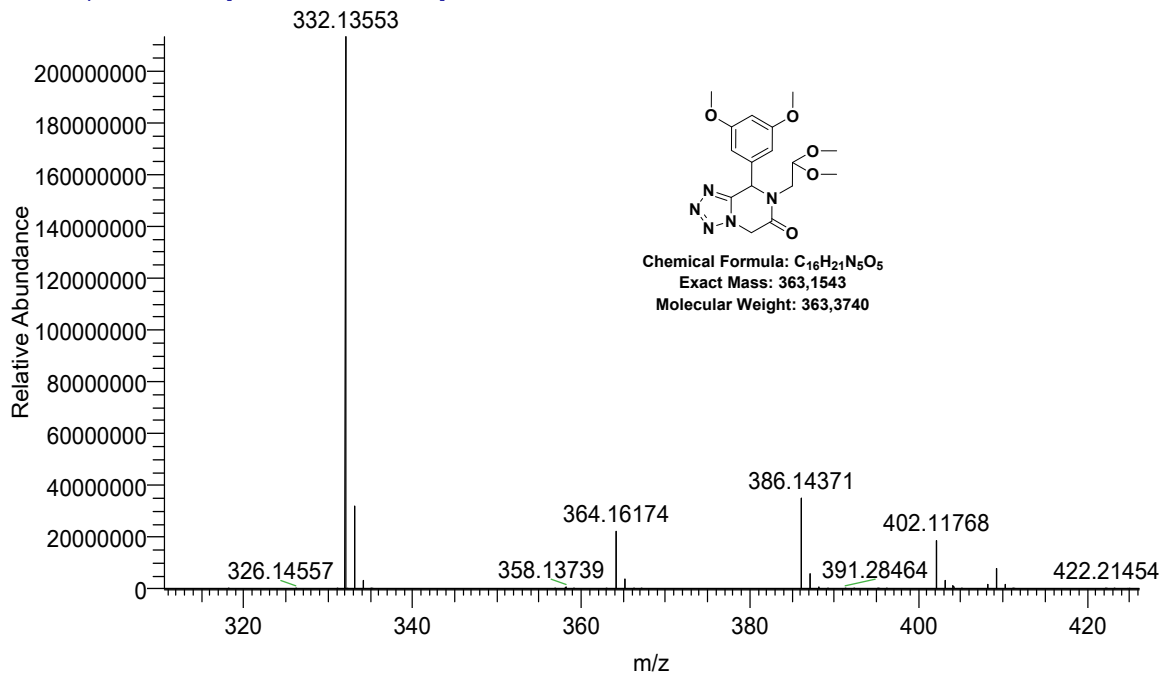

**15: 10,12-dimethoxy-13*b*H-tetrazolo[5',1':3,4]pyrazino[2,1-*a*]isoquinolin-6(5*H*)-one**

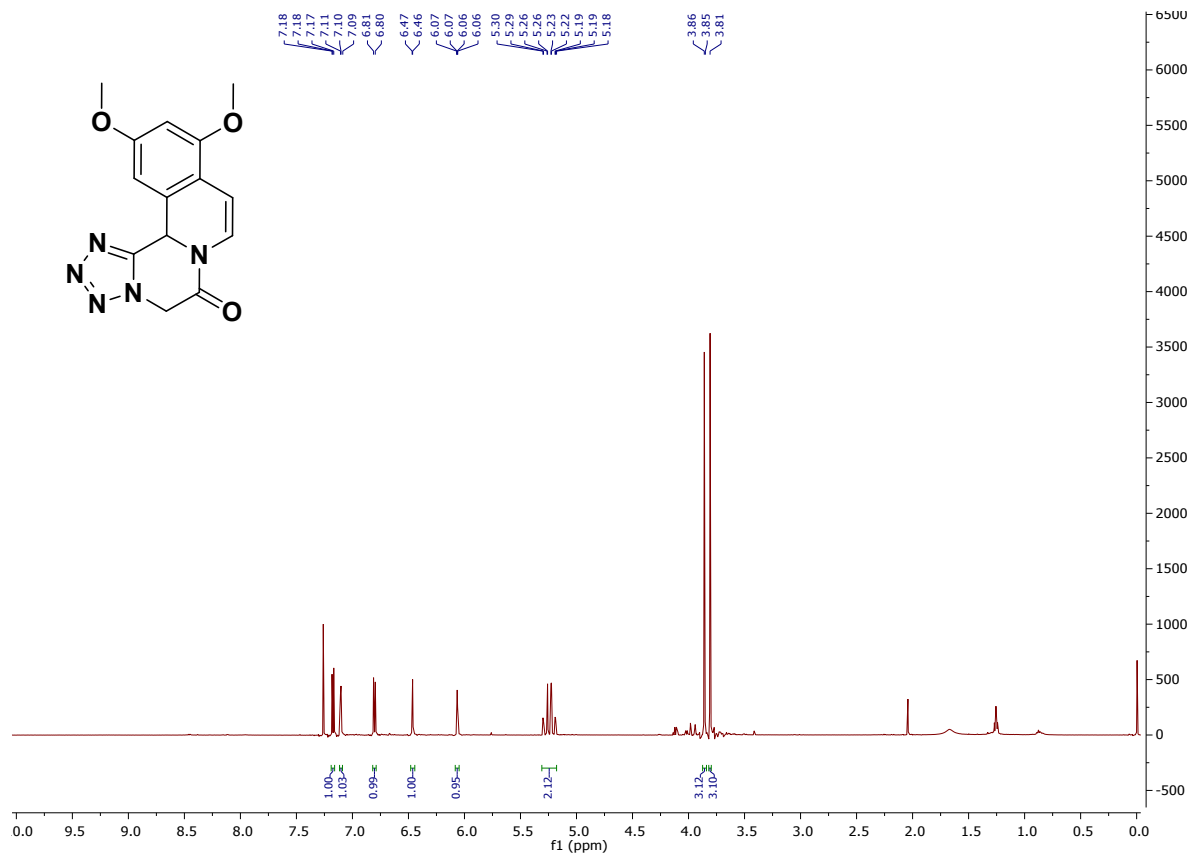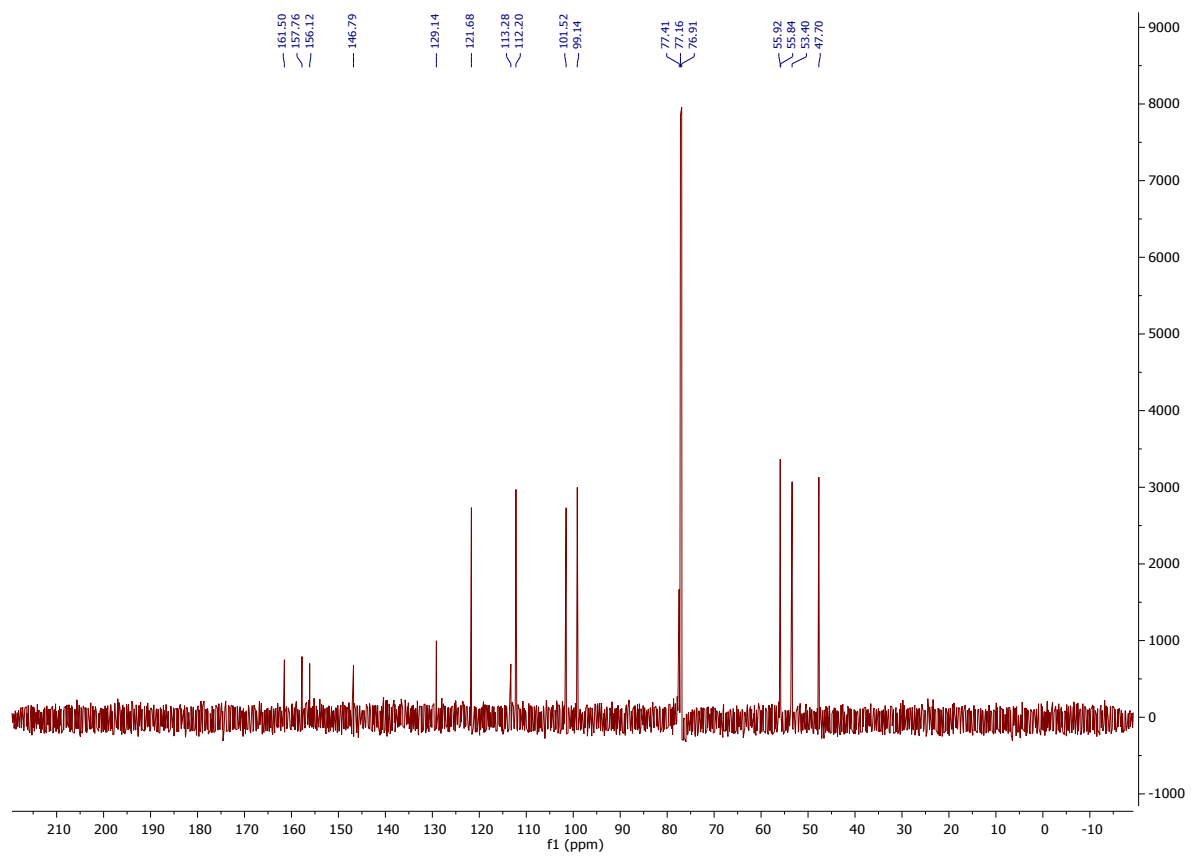



MSC-18MDV093-YZ337C #953 RT: 4.24576 AV: 1 NL: 3.90E8  
T: FTMS + p ESI Full ms [150.0000-1000.0000]

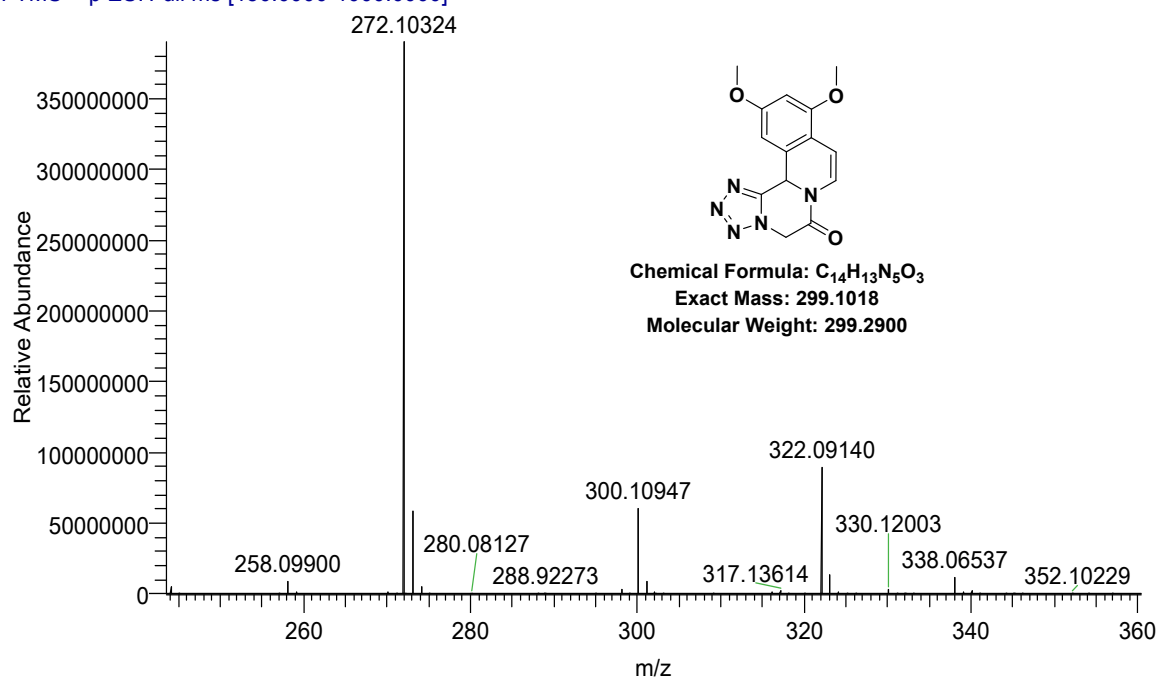

## Crystal structure determination

X-ray diffraction data for single crystals of compounds **6j**, **8a**, **10b**, **10d** and **13d** was collected using SuperNova (Rigaku - Oxford Diffraction) four circle diffractometer with a mirror monochromator and a microfocus MoK $\alpha$  radiation source ( $\lambda = 0.71073 \text{ \AA}$ ) which was used for monocrystals of **6j**, **8a** and **13d**, and CuK $\alpha$  radiation source ( $\lambda = 1.5418 \text{ \AA}$ ) used for **10b** and **10d**. Additionally, the diffractometer was equipped with a CryoJet HT cryostat system (Oxford Instruments) allowing low temperature experiments performed at 130(2) K for all but **6j**, for which the experiment temperature was set at 120(2) K. The obtained data sets were processed with CrysAlisPro software [S1]. The phase problem was solved with direct methods using SIR2004 [S2] or SUPERFLIP [S3]. Parameters of obtained models were refined by full-matrix least-squares on  $F^2$  using SHELXL-2014/6 [S4]. Calculations were performed using WinGX integrated system (ver. 2014.1) [S5]. Figure was prepared with Mercury 3.7 software [S6].

All non-hydrogen atoms were refined anisotropically. All hydrogen atoms attached to carbon atoms were positioned with the idealised geometry and refined using the riding model with the isotropic displacement parameter  $U_{\text{iso}}[\text{H}] = 1.2$  (or 1.5 (methyl groups only))  $U_{\text{eq}}[\text{C}]$ . Hydrogen atoms bound to nitrogen atoms were positioned on the difference Fourier map and were refined with no restraints on the isotropic displacement parameters. Crystal data and structure refinement results for presented crystal structures are shown in Table S1. The molecular geometry observed in crystal structures are shown in Figure S1.

In the asymmetric unit of **8a** two independent molecules are observed with slightly different conformation of the phenethyl group. In the case of structure **6j**, a conformational disorder within the phenyl ring of the phenethyl group is observed, with refined site occupancies being equal for both alternative conformers.

Crystallographic data have been deposited with the Cambridge Crystallographic Data Centre as supplementary publication nos.: CCDC 1573261 (**6j**), CCDC1827938 (**8a**), CCDC 1856636 (**10b**) CCDC 1827865 (**10d**) and CCDC1828772 (**13d**). Copies of the data can be obtained, free of charge, on application to CCDC, 12 Union Road, Cambridge CB2 1EZ, UK, (fax: +44-(0)1223-336033 or e-mail: deposit@ccdc.cam.ac.uk).

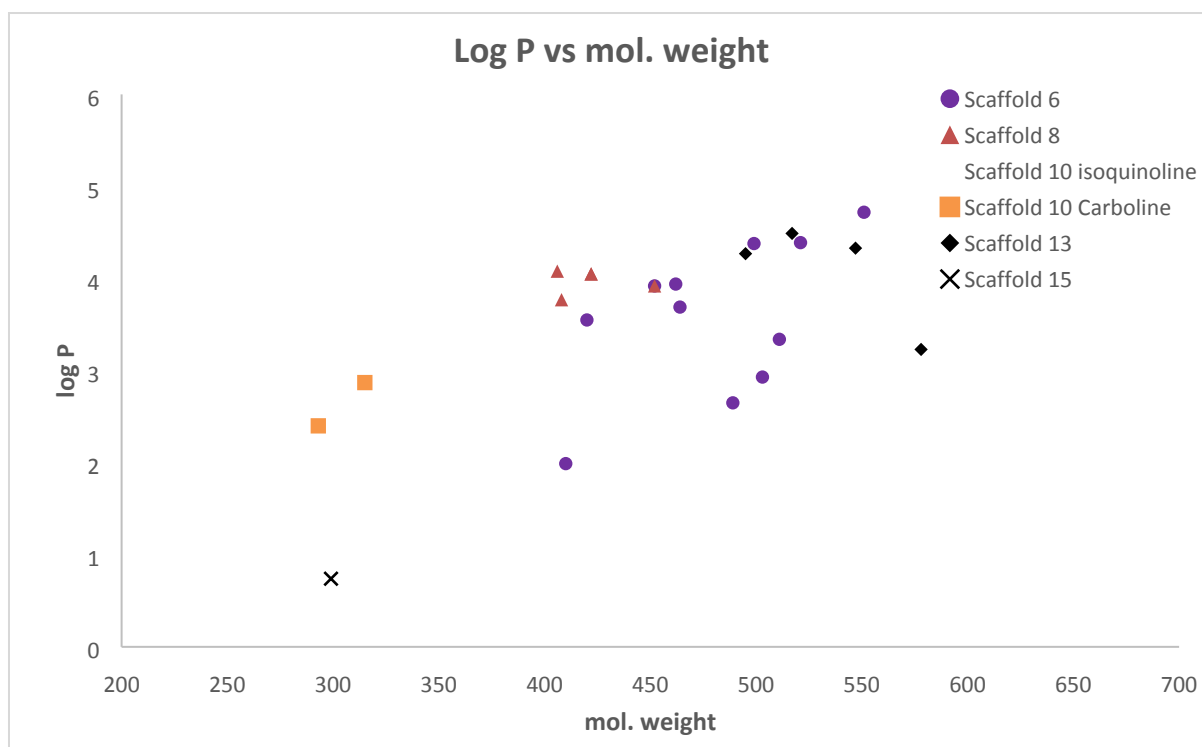

**Figure. SI-1a:** All synthesized molecules reported in this manuscript in a single plot of log P vs mol. weight.

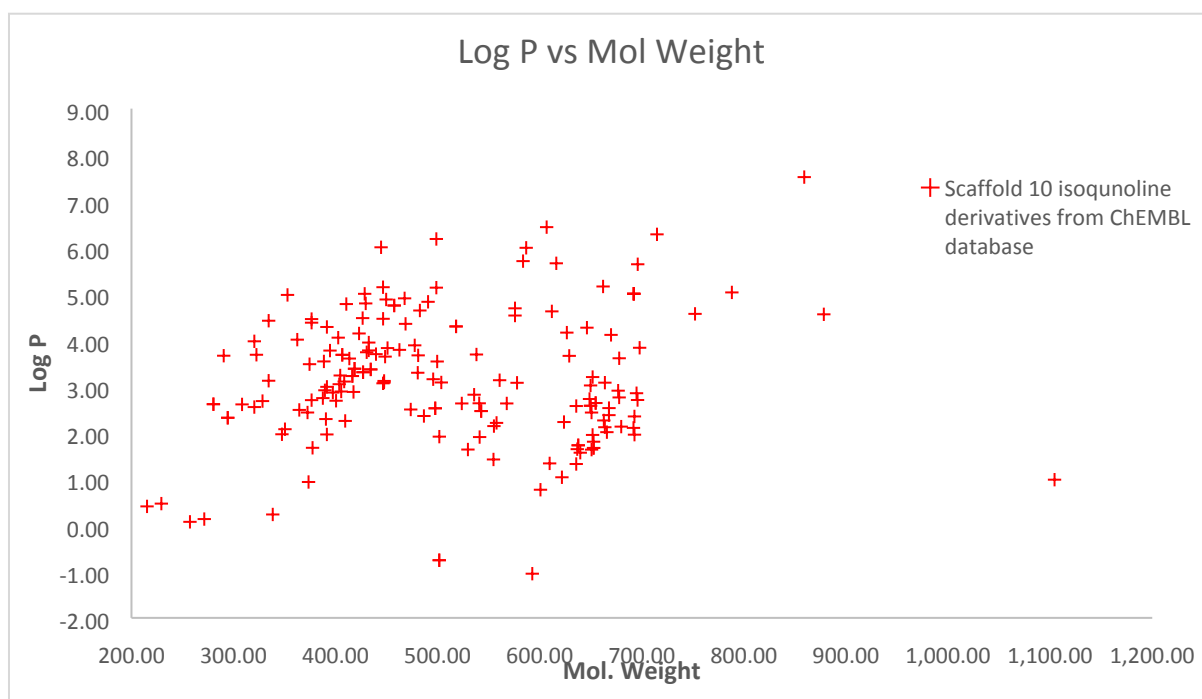

**Figure. SI-1b:** Lipophilicity vs molecular weight of 100 randomly selected of ChEMBL database of scaffold 10-isoquinoline.

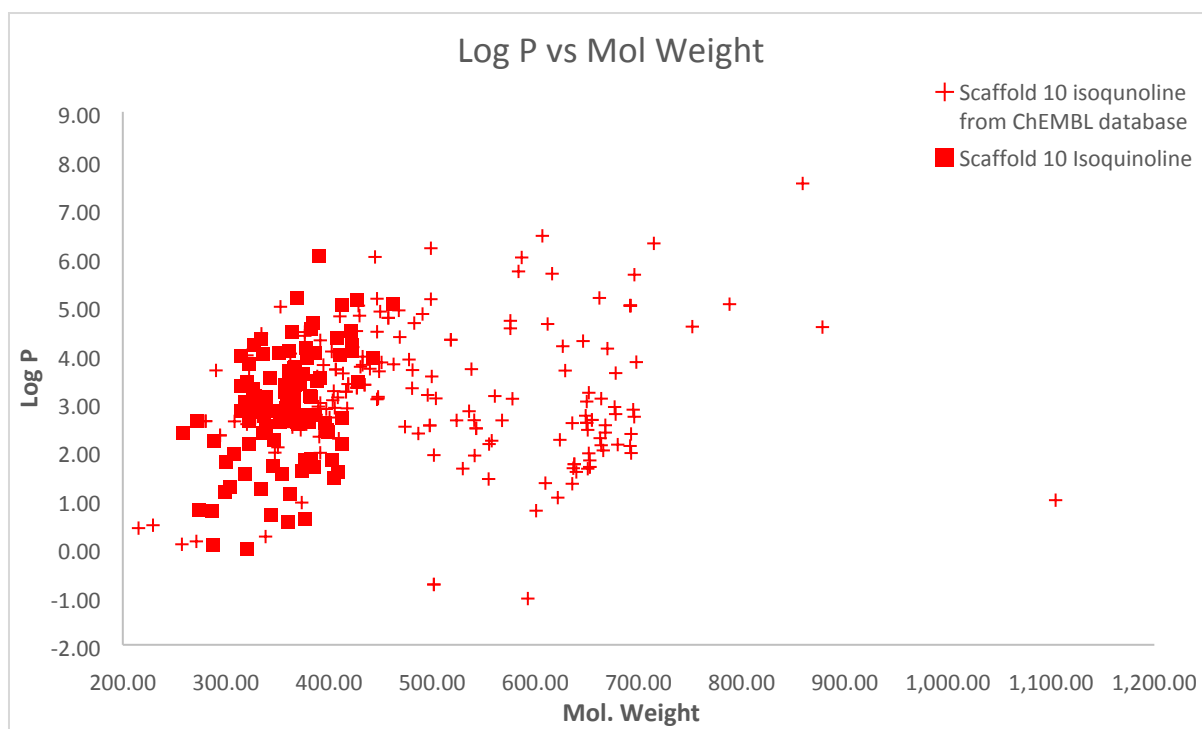

**Figure. SI-1c:** Comparison of 176 random molecules from the ChEMBL database and 100 virtually generated molecules of scaffold **10**-isoquinoline. Most of our randomly generate molecules fullfil the Lipinski's rule of 5.

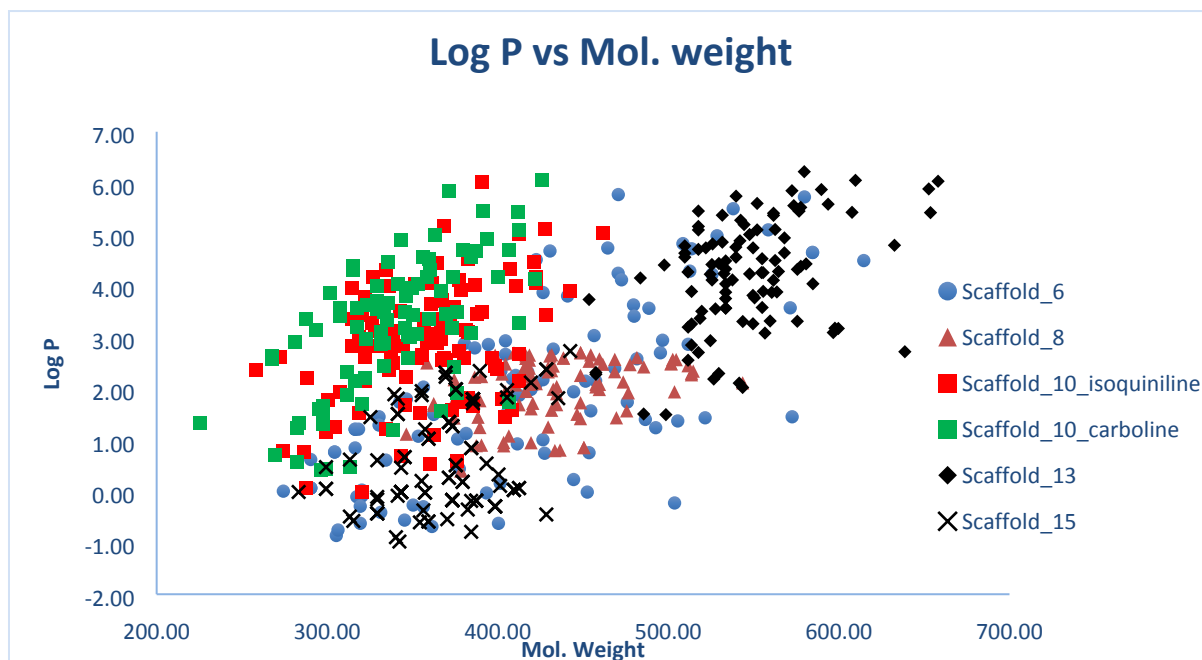

**Figure. SI-1d:** Lipophilicity vs molecular weight plotof virtual libraries of 100 randomly generated molecules of scaffolds of scaffold\_6 (blue, circle), scaffold\_8 (orange, tringle), scaffold\_10-isoquiniline (red, square), scaffold\_10-carboline (green, square), scaffold\_13 (black, square), and scaffold\_15 (black, cross).

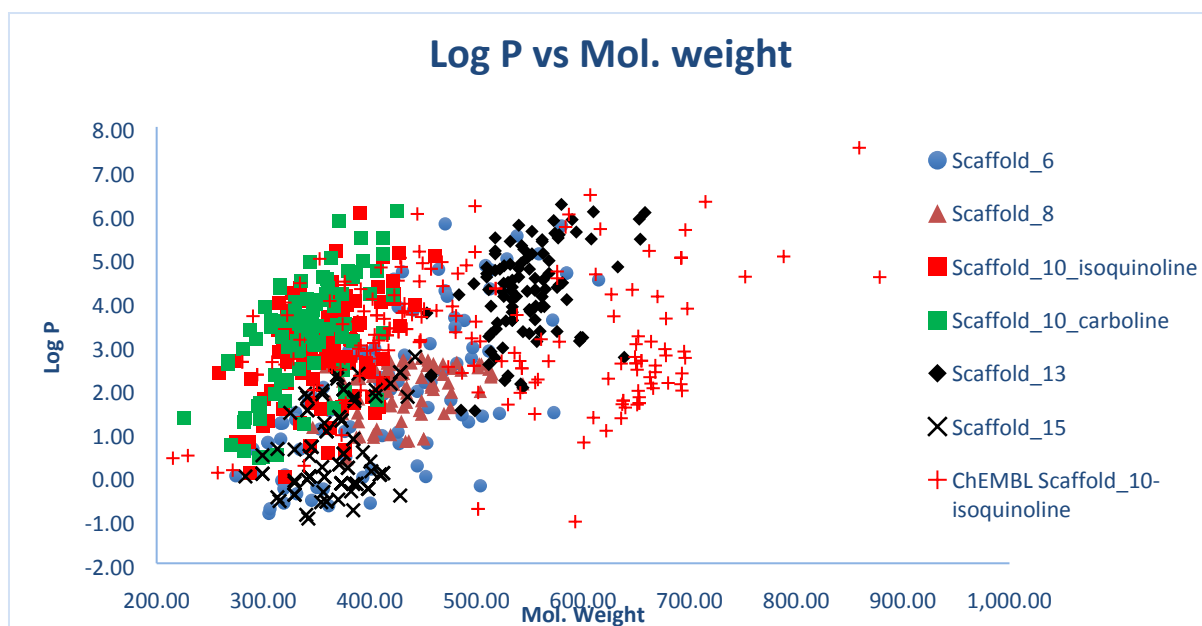

**Figure. SI-1e:** log P vs Mol. Weight of virtual libraries of 100 randomly generated molecules of scaffolds of scaffold\_6 (blue, circle), scaffold\_8 (orange, triangle), scaffold\_10-isoquinoline (red, square), scaffold\_10-carboline (green, square), scaffold\_13 (black, square), and scaffold\_15 (black, cross) comparing with the ChEMBL database of scaffold\_10-isoquinoline molecules (yellow-red, square-plus).

## References:

[S1] Rigaku-Oxford Diffraction; CrysAlisPro Oxford Diffraction Ltd, Abingdon, England V 1. 171. 36. 2. (release 27-06-2012 CN) 2006.

[S2] Burla M.C., Caliandro R., Camalli M., Carrozzini B., Cascarano G.L., De Caro L., Giacovazzo C., Polidori G. and Spagna R., *J. Appl. Cryst.* 2005, 38(2), 381–388.

[S3] Palatinus L., Chapuis G., *J. App. Cryst.* 2007, 40, 786-790.

[S4] Sheldrick G. M., *Acta Cryst.* 2008, A64, 112-122.

[S5] Farrugia L.J., *J. Appl. Cryst.* 1999, 32, 837-838.

[S6] Macrae C. F., Edgington P.R., McCabe P., Pidcock E., Shields G.P., Taylor R., Towler M. and van de Streek J., *J. Appl. Cryst.* 2006, 39,
